# Supplementary material for: Diethyl phosphite-mediated switchable synthesis of bis(imidazoheterocycles) derived disulfanes and sulfanes using imidazoheterocycles and octasulfur
Source: Royal Society of Chemistry journal article supplement (doi:10.1039/d1nj05226h), 2022-01-01

# Electronic Supplementary Information (ESI)

## Diethyl phosphite-mediated switchable synthesis of bis(imidazoheterocycles)disulfanes using imidazoheterocycles and octasulfur

Raju Jannapu Reddy, \*<sup>a</sup> Angothu Shankar,<sup>a</sup> Jangam Jagadesh Kumar, <sup>a</sup> and Nunavath Sharadha <sup>a</sup>

<sup>a</sup> Department of Chemistry, University College of Science, Osmania University, Hyderabad 500 007, India. E-mail: [rajuchem77@osmania.ac.in](mailto:rajuchem77@osmania.ac.in); [rajuchem08@yahoo.co.in](mailto:rajuchem08@yahoo.co.in)

\*Webpages: <https://www.rjreddyresearchgroup.com/>

Gamidi Rama Krishna <sup>b</sup>

<sup>b</sup> X-ray Crystallography, CSIR-National Chemical Laboratory, Pune 411 008, India.

---

### Table of Contents

|                                                                                          |    |
|------------------------------------------------------------------------------------------|----|
| General Experimental .....                                                               | 3  |
| Synthesis of Starting Materials .....                                                    | 4  |
| Synthesis of imidazoheterocycles (1a-v):.....                                            | 4  |
| General Procedure-1 (GP1) for the synthesis of bis(imidazoheterocycle)-disulfanes: ..... | 5  |
| 1,2-Bis(2-phenylimidazo[1,2-a]pyridin-3-yl)disulfane (2a): .....                         | 5  |
| 1,2-Bis[2-(p-tolyl)imidazo[1,2-a]pyridin-3-yl]disulfane (2b): .....                      | 5  |
| 1,2-Bis[2-(4-chlorophenyl)imidazo[1,2-a]pyridin-3-yl]disulfane(2c): .....                | 6  |
| 1,2-Bis[2-(4-methoxyphenyl)imidazo[1,2-a]pyridin-3-yl]disulfane (2d):.....               | 6  |
| 1,2-Bis[2-(2-bromophenyl)imidazo[1,2-a]pyridin-3-yl]disulfane (2e):.....                 | 6  |
| 1,2-Bis[2-(3-bromophenyl)imidazo[1,2-a]pyridin-3-yl]disulfane (2f):.....                 | 7  |
| 1,2-Bis[2-(3-methoxyphenyl)imidazo[1,2-a]pyridin-3-yl]disulfane (2g):.....               | 7  |
| 1,2-Bis[2-(thiophen-2-yl)imidazo[1,2-a]pyridin-3-yl]disulfane (2h): .....                | 7  |
| 1,2-Bis(8-methyl-2-phenylimidazo[1,2-a]pyridin-3-yl)disulfane (2i):.....                 | 7  |
| 1,2-Bis(8-methyl-2-(p-tolyl)imidazo[1,2-a]pyridin-3-yl)disulfane(2j):.....               | 8  |
| 1,2-Bis(8-methyl-2-(naphthalen-2-yl)imidazo[1,2-a]pyridin-3-yl)disulfane (2k): .....     | 8  |
| 1,2-Bis(7-methyl-2-phenylimidazo[1,2-a]pyridin-3-yl)disulfane (2l):.....                 | 8  |
| 1,2-Bis(7-methyl-2-(p-tolyl)imidazo[1,2-a]pyridin-3-yl)disulfane (2m): .....             | 8  |
| 1,2-Bis(6-chloro-2-phenylimidazo[1,2-a]pyridin-3-yl)disulfane (2n):.....                 | 9  |
| 1,2-Bis(6-bromo-2-phenylimidazo[1,2-a]pyridin-3-yl)disulfane (2o): .....                 | 9  |
| 1,2-Bis(2-((E)-styryl)imidazo[1,2-a]pyridin-3-yl)disulfane (2p):.....                    | 9  |
| 1,2-Bis(6-phenylimidazo[2,1-b]thiazol-5-yl)disulfane (2q):.....                          | 9  |
| 1,2-Bis(2-phenylbenzo[d]imidazo[2,1-b]thiazol-3-yl)disulfane (2r): .....                 | 9  |
| General Procedure-2 (GP2) for synthesis of bis(imidazoheterocycle)sulfanes: .....        | 10 |

|                                                                                                                                             |    |
|---------------------------------------------------------------------------------------------------------------------------------------------|----|
| <i>Bis</i> [2-phenylimidazo[1,2- <i>a</i> ]pyridin-3-yl]sulfane ( <i>3a</i> ):.....                                                         | 10 |
| <i>Bis</i> [2-( <i>p</i> -tolyl)imidazo[1,2- <i>a</i> ]pyridin-3-yl]sulfane ( <i>3b</i> ):.....                                             | 10 |
| <i>Bis</i> [2-(4-chlorophenyl)imidazo[1,2- <i>a</i> ]pyridin-3-yl]sulfane ( <i>3c</i> ):.....                                               | 10 |
| <i>Bis</i> [2-(4-methoxyphenyl)imidazo[1,2- <i>a</i> ]pyridin-3-yl]sulfane ( <i>3d</i> ):.....                                              | 11 |
| <i>Bis</i> [2-(3-methoxyphenyl)imidazo[1,2- <i>a</i> ]pyridin-3-yl]sulfane ( <i>3g</i> ):.....                                              | 11 |
| <i>Bis</i> [2-(thiophen-2-yl)imidazo[1,2- <i>a</i> ]pyridin-3-yl]sulfane ( <i>3h</i> ):.....                                                | 11 |
| <i>Bis</i> (8-methyl-2-phenylimidazo[1,2- <i>a</i> ]pyridin-3-yl)sulfane ( <i>3i</i> ): .....                                               | 11 |
| <i>Bis</i> [8-methyl-2-( <i>p</i> -tolyl)imidazo[1,2- <i>a</i> ]pyridin-3-yl]sulfane ( <i>3j</i> ): .....                                   | 12 |
| <i>Bis</i> [8-methyl-2-(naphthalen-2-yl)imidazo[1,2- <i>a</i> ]pyridin-3-yl]sulfane ( <i>3k</i> ): .....                                    | 12 |
| <i>Bis</i> (7-methyl-2-phenylimidazo[1,2- <i>a</i> ]pyridin-3-yl)sulfane ( <i>3l</i> ): .....                                               | 12 |
| <i>Bis</i> [7-methyl-2-( <i>p</i> -tolyl)imidazo[1,2- <i>a</i> ]pyridin-3-yl]sulfane ( <i>3m</i> ):.....                                    | 12 |
| <i>Bis</i> (6-chloro-2-phenylimidazo[1,2- <i>a</i> ]pyridin-3-yl)sulfane ( <i>3n</i> ): .....                                               | 13 |
| <i>Bis</i> (6-bromo-2-phenylimidazo[1,2- <i>a</i> ]pyridin-3-yl)sulfane ( <i>3o</i> ):.....                                                 | 13 |
| <i>Bis</i> [2-[( <i>E</i> )-styryl]imidazo[1,2- <i>a</i> ]pyridin-3-yl]sulfane ( <i>3p</i> ):.....                                          | 13 |
| <i>Bis</i> (6-phenylimidazo[2,1- <i>b</i> ]thiazol-5-yl)sulfane ( <i>3q</i> ):.....                                                         | 13 |
| <i>Bis</i> (2-phenylbenzo[ <i>d</i> ]imidazo[2,1- <i>b</i> ]thiazol-3-yl)sulfane ( <i>3r</i> ):.....                                        | 14 |
| <i>Bis</i> [2-(2,4-dichlorophenyl)imidazo[1,2- <i>a</i> ]pyridin-3-yl]sulfane ( <i>3s</i> ):.....                                           | 14 |
| <i>Bis</i> [7-methyl-2-(thiophen-2-yl)imidazo[1,2- <i>a</i> ]pyridin-3-yl]sulfane ( <i>3t</i> ):.....                                       | 14 |
| <i>Bis</i> [7-methyl-2-(pyrimidin-2-yl)imidazo[1,2- <i>a</i> ]pyridin-3-yl]sulfane ( <i>3u</i> ): .....                                     | 14 |
| <i>Bis</i> {2-[( <i>E</i> )-2-(2,6,6-trimethylcyclohex-1-en-1-yl)vinyl]imidazo[1,2- <i>a</i> ]pyridin-3-yl}-sulfane ( <i>3v</i> ):<br>..... | 15 |
| General Procedure-3 (GP3) for the synthesis of imidazo[1,2- <i>a</i> ]pyridine-indole derived sulfanes:...                                  | 15 |
| 3-[(1 <i>H</i> -Indol-3-yl)thio]-2-phenylimidazo[1,2- <i>a</i> ]pyridine ( <i>5aa</i> ): .....                                              | 15 |
| 3-[(5-Bromo-1 <i>H</i> -indol-3-yl)thio]-2-phenylimidazo[1,2- <i>a</i> ]pyridine ( <i>5ab</i> ):.....                                       | 16 |
| 3-[(6-Fluoro-1 <i>H</i> -indol-3-yl)thio]-2-phenylimidazo[1,2- <i>a</i> ]pyridine ( <i>5ac</i> ): .....                                     | 16 |
| 3-[(5-Methoxy-1 <i>H</i> -indol-3-yl)thio]-2-phenylimidazo[1,2- <i>a</i> ]pyridine ( <i>5ad</i> ): .....                                    | 16 |
| 3-[(1 <i>H</i> -Indol-3-yl)thio]-2-( <i>p</i> -tolyl)imidazo[1,2- <i>a</i> ]pyridine ( <i>5ba</i> ): .....                                  | 17 |
| 3-[(5-Bromo-1 <i>H</i> -indol-3-yl)thio]-2-( <i>p</i> -tolyl)imidazo[1,2- <i>a</i> ]pyridine ( <i>5bb</i> ):.....                           | 17 |
| 3-[(6-Fluoro-1 <i>H</i> -indol-3-yl)thio]-2-( <i>p</i> -tolyl)imidazo[1,2- <i>a</i> ]pyridine ( <i>5bc</i> ): .....                         | 17 |
| 3-[(5-Methoxy-1 <i>H</i> -indol-3-yl)thio]-2-( <i>p</i> -tolyl)imidazo[1,2- <i>a</i> ]pyridine ( <i>5bd</i> ):.....                         | 18 |
| Table S1: Crystal data and structure refinement for <i>2i</i> and <i>3a</i> .....                                                           | 18 |
| References .....                                                                                                                            | 20 |
| Unknown Compounds Spectra <sup>1</sup> H and <sup>13</sup> C NMR Spectra.....                                                               | 20 |

## General Experimental

All reagents were purchased from Sigma-Aldrich (Merck), Alfa Aesar, Acros, SDFine, Spectrochem or AVRA and used without further purification unless otherwise stated. For all reactions carried out under inert atmosphere, solvents were dried over activated 4 Å molecular sieves. Silicon oil baths on stirrer hotplates were employed with temperature control via thermometer. Reaction progress was monitored by Thin Layer Chromatography (TLC) performed using TLC Silica gel 60 F254. TLC plate's visualization was achieved by a combination of ultraviolet light (254 nm), potassium permanganate solution, iodine treatment or p-anisaldehyde stains. Flash column chromatography was performed using silica gel (100-200 mesh) as a stationary phase. Melting points were measured in open capillaries using DBK digital melting point apparatus and are uncorrected.  $^1\text{H}$  NMR and  $^{13}\text{C}$  NMR's were recorded using Bruker AVIII400 ( $^1\text{H}$  = 400 MHz and  $^{13}\text{C}$  = 101 MHz) with the spectrometers at 300 K. Chemical shifts ( $\delta$ ) are given in ppm relative to TMS and coupling constants (J) are quoted in Hz to one decimal place. For spectra recorded in chloroform-d ( $\text{CDCl}_3$ ) the  $\delta$  7.26 ppm resonance of residual  $\text{CHCl}_3$  for proton spectra and  $\delta$  77.16 ppm resonance of  $\text{CDCl}_3$  for carbon spectra were used as internal references. Spectral data for  $^1\text{H}$  NMR spectroscopy is reported as follows: Chemical shift (multiplicity, coupling constant, number of protons); and for  $^{13}\text{C}$  NMR spectroscopy: Chemical shift. The following abbreviations were used for multiplicity in  $^1\text{H}$  NMR: s (singlet), d (doublet), t (triplet), q (quadruplet), dd (doublet of doublets), td (triplet of doublets), quin (quintuplet), bs (broad singlet), m (multiplet), app. (apparent). All NMR spectrums are processed using MestReNova version 6.0.2(v). Mass spectra were analysed by Electrospray Ionization (ESI) method that were obtained on a Shimadzu LCMS-2020 mass spectrometer. High resolution mass spectroscopy (HRMS) were recorded using ESI-TOF techniques and was obtained using a Thermo scientific Exactive™ Orbitrap mass spectrometer or Q STAR XL Hybrid MS/MS to adjust the calibrated mass scale.

The single crystal X-ray diffraction measurements for all the components were performed at 100 K using APEX2 (Bruker, 2016; Bruker D8 VENTURE Kappa Duo PHOTON II CPAD) diffractometer having graphite-monochromatized ( $\text{MoK}\alpha = 0.71073 \text{ \AA}$ ). The X-ray generator was operated at 50 kV and 30 mA. A preliminary set of unit cell parameters and an orientation matrix were calculated from 36 frames, and the cell refinement was performed by SAINT-Plus (Bruker, 2016). An optimized strategy used for data collection consisted of different sets of  $\varphi$  and  $\omega$  scans with  $0.5^\circ$  steps  $\varphi/\omega$ . The data were collected with a time frame of 10 sec for all four components by setting the sample to detector distance fixed at 40 cm. All the data points were corrected for Lorentzian, polarization, and absorption effects using SAINT-Plus and SADABS programs (Bruker, 2016). SHELXS-97 (Sheldrick, 2008) was used for structure solution, and full-matrix least-squares refinement on  $F^2$ . The molecular graphics of ORTEP diagrams were performed by Mercury software. The crystal symmetry of all four components was cross-checked by running the cif files through PLATON (Spek, 2020) software and notified that no additional symmetry was observed. The Encifer software was used to correct the cif files.

## Synthesis of Starting Materials

### Synthesis of imidazoheterocycles (1a-v):

**Method-A:** According to known procedure (Scheme S1),<sup>1</sup> a heat gun-dried round bottle flask was charged  $\beta$ -keto bromides (5 mmol, 1.0 equiv), various 2-aminopyridines (7.5 mmol, 1.5 equiv) and sodium bicarbonates (7.5 mmol, 1.5 equiv) in CH<sub>3</sub>CN/H<sub>2</sub>O (9:1 mL, 10 mL). The reaction mixture was stirred at 80 °C for 1 h and monitored by TLC either complete or appeared to be proceeding no further progress. The mixture was quenched by addition of water (30 mL) followed by extraction with EtOAc (3x40 mL). The combined organic layers were washed with brine (2x30 mL), dried over anhydrous Na<sub>2</sub>SO<sub>4</sub>, and the solvent was removed under reduced pressure. The resulting residue was subjected to flash column chromatography (silica gel 60-120 mesh, eluted with 20-30% ethyl acetate/petether) to afford desired of imidazoheterocycles **1a-t**.

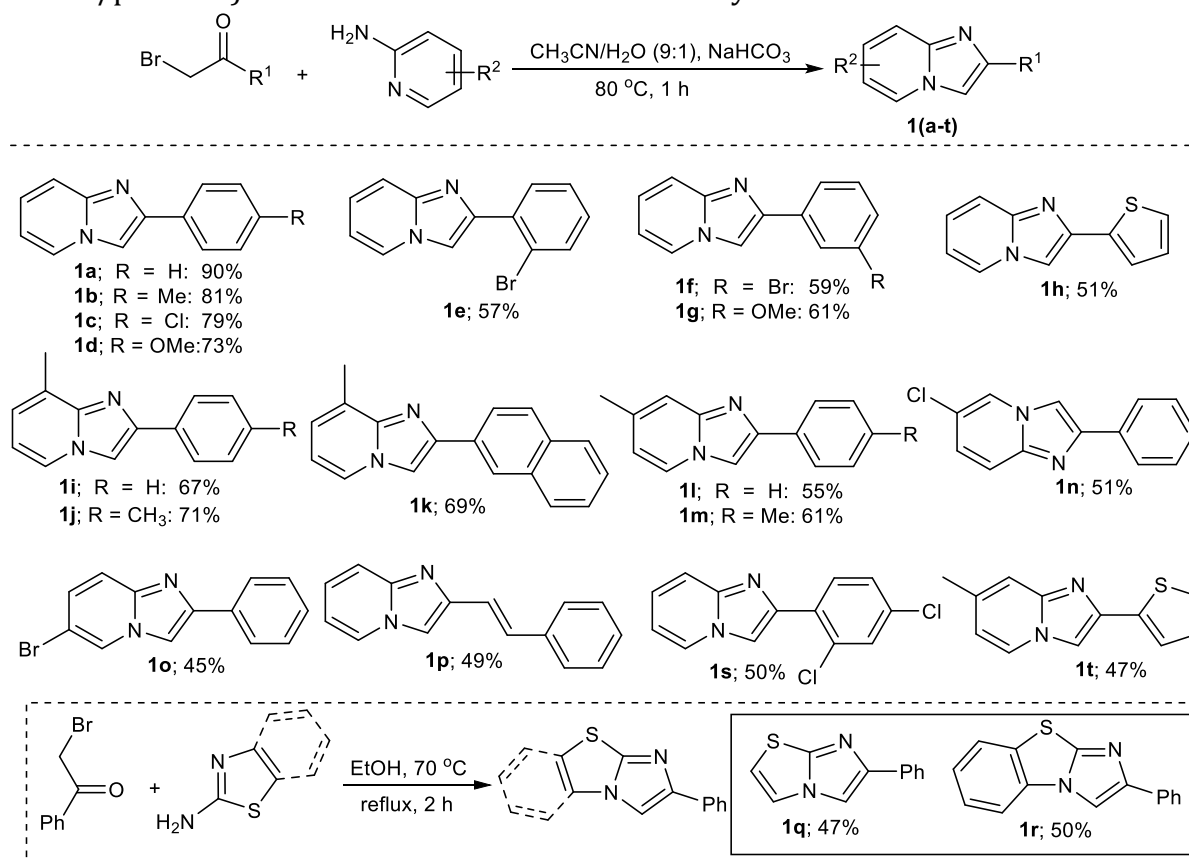

**Scheme S1:** Synthesis of imidazoheterocycles **1a-t**.

**Method-B:** According to known procedure (Scheme S2),<sup>2</sup> a heat gun-dried round bottle flask was charged 1-(pyrimidin-2-yl)ethan-1-one or (*E*)-4-(2,6,6-trimethylcyclohex-1-en-1-yl)but-3-en-2-one (4.0 mmol, 1.0 equiv), 4-methylpyridin-2-amine or pyridin-2-amine (4.8 mmol, 1.2 equiv), iodine (4 mmol, 1 equiv), and ammonium acetate (8 mmol, 2 equiv) in CHCl<sub>3</sub> (15 mL). The reaction mixture was stirred at room temperature for 16 h and monitored by TLC either complete or appeared to be proceeding no further progress. The mixture was quenched by addition of 10% sodium thiosulfate solution (10 mL) and water (20 mL) followed by extraction with EtOAc (2x40 mL). The combined organic layers were washed with brine (2x10 mL) dried over anhydrous Na<sub>2</sub>SO<sub>4</sub>, and the solvent was removed under reduced pressure. The resulting residue was subjected to

flash chromatography (silica gel 100-200 mesh, eluted with 25-30% ethyl acetate/petether) to afford desired product imidazopyridines **1u** and **1v**.

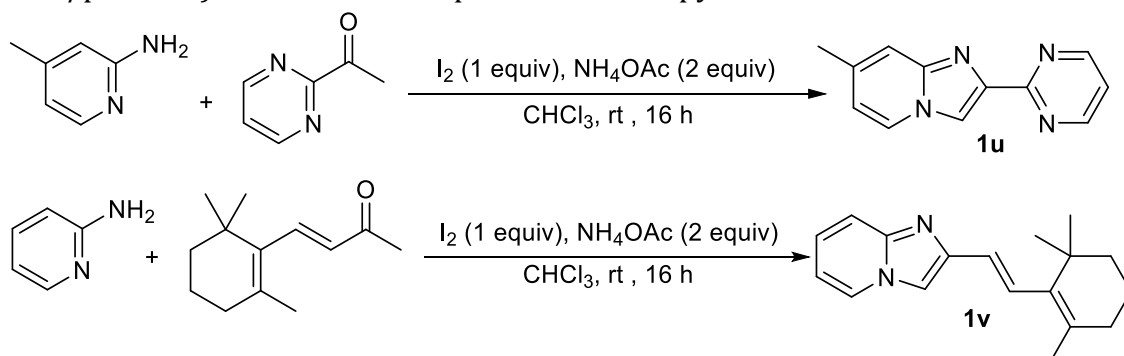

**Scheme S2:** Synthesis of imidazo[1,2-*a*]pyridines **1u** and **1v**.

**General Procedure-1 (GP1) for the synthesis of bis(imidazoheterocycle)disulfanes:**

A heat gun-dried Schlenk tube was charged imidazoheterocycles (0.5 mmol, 1.0 equiv),  $S_8$  (5.0 mmol, 10 equiv) and diethyl phosphite (0.25 mmol, 0.5 equiv) in DMSO (2.5 mL). The reaction mixture was stirred at 120 °C for 22 h and monitored by TLC either complete or appeared to be preceding no further progress. The mixture was quenched by addition of water (10 mL) followed by extraction with EtOAc (3x10 mL). The combined organic layers were washed with brine (2x10 mL), dried over anhydrous  $Na_2SO_4$ , and the solvent was removed under reduced pressure. The resulting residue was subjected to flash column chromatography (silica gel 100-200 mesh, eluted with 40-50% ethyl acetate/petether) to afford desired bis(imidazoheterocycle)disulfanes.

**1,2-Bis(2-phenylimidazo[1,2-*a*]pyridin-3-yl)disulfane (2a):**

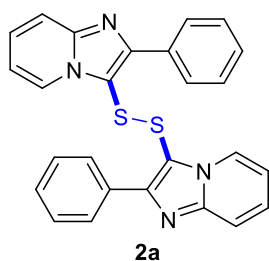

Following **GP1** using 2-phenylimidazo[1,2-*a*]pyridine **1a** (97.1 mg, 0.5 mmol),  $S_8$  (160.0 mg, 5.0 mmol) and diethyl phosphite (34.5 mg, 32  $\mu$ L, 0.25 mmol) for 22 h. Purified by flash column chromatography (silica gel, 40% EtOAc in petether) yielded title compound **2a** as a yellow solid (189.2 mg, 84%); **mp**: 239-241 °C [Lit.<sup>3</sup> 242-243 °C]; **<sup>1</sup>H NMR** (400 MHz,  $CDCl_3$ )  $\delta$  8.10 (d,  $J$  = 6.6 Hz, 2H), 7.63 (app. bs, 4H), 7.37 (d,  $J$  = 8.5 Hz, 2H), 7.20 (t,  $J$  = 7.2 Hz, 2H), 7.13–7.09 (m, 6H), 6.74 (td,  $J$  = 6.8, 0.7 Hz, 2H); **LCMS** (ESI,

$M+H^+$ ): 451.15. These data are consistent with literature values.<sup>3</sup>

**Gram-Scale Reaction:** Following **GP1** using 2-phenylimidazo[1,2-*a*]pyridine **1a** (1.16 g, 6.0 mmol),  $S_8$  (1.92 g, 60.0 mmol) and diethylphosphite (414.0 mg, 386.0  $\mu$ L, 3.0 mmol) in DMSO (25 mL) for 24 h. Purification by flash column chromatography (silica gel, 40% EtOAc in petether) yielded title compound **2a** (1.71 g, 63%) as a yellow solid.

**1,2-Bis[2-(*p*-tolyl)imidazo[1,2-*a*]pyridin-3-yl]disulfane (2b):**

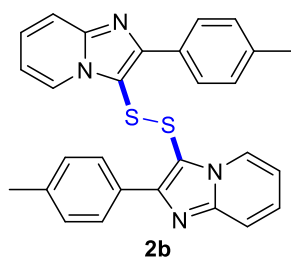

Following **GP1** using 2-(*p*-tolyl)imidazo[1,2-*a*]pyridine **1b** (104.1 mg, 0.5 mmol),  $S_8$  (160.0 mg, 5 mmol) and diethylphosphite (34.5 mg, 32  $\mu$ L, 0.25 mmol) for 22 h. Purified by flash column chromatography (silica gel, 40% EtOAc in petether) yielded title compound **2b** as a white solid (181.9 mg, 76%); **mp**: 201-203 °C [Lit.<sup>3</sup> 203-204 °C]; **<sup>1</sup>H NMR** (400 MHz,  $CDCl_3$ )  $\delta$  8.10 (d,  $J$  = 6.5 Hz, 2H), 7.53 (app. bs, 4H), 7.32 (d,  $J$  = 7.9 Hz, 2H), 7.19–7.14 (m, 2H),

6.87 (d,  $J = 6.6$  Hz, 4H), 6.74 (t,  $J = 6.8$  Hz, 2H), 2.27 (s, 6H); **LCMS** (ESI,  $M+H^+$ ): 479.15. These data are consistent with literature values.<sup>3</sup>

**Gram-Scale Reaction:** Following **GP1** using 2-(*p*-tolyl)imidazo[1,2-*a*]pyridine **1b** (1.05 g, 5.0 mmol),  $S_8$  (1.60 mg, 50.0 mmol) and diethyl phosphite (345.0 mg, 322  $\mu$ L, 2.5 mmol) DMSO (20 mL) for 24 h. Purification by flash column chromatography (silica gel, 40% EtOAc in petether) yielded title compound **2b** (1.44 g, 60%) as a colorless solid.

**1,2-Bis[2-(4-chlorophenyl)imidazo[1,2-*a*]pyridin-3-yl]disulfane (2c):**

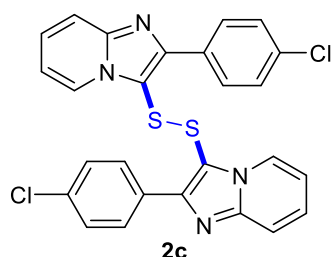

Following **GP1** using 2-(4-chlorophenyl)imidazo[1,2-*a*]pyridine **1c** (114.3 mg, 0.5 mmol),  $S_8$  (160.0 mg, 5.0 mmol) and diethyl phosphite (34.5 mg, 32  $\mu$ L, 0.25 mmol) for 22 h. Purified by flash column chromatography (silica gel, 40% EtOAc in petether) yielded title compound **2c** as a yellow solid (148.0 mg, 57%); **mp**: 213-215  $^{\circ}$ C [Lit.<sup>3</sup> 210-212  $^{\circ}$ C];  **$^1$ H NMR** (400 MHz,  $CDCl_3$ )  $\delta$  8.22 (s, 2H), 7.43 (app. bs, 4H), 7.28 (d,  $J = 4.1$  Hz, 4H), 6.96–6.86 (m, 6H); **LCMS** (ESI,  $M^+$ ): 519.10. These

data are consistent with literature values.<sup>3</sup>

**1,2-Bis[2-(4-methoxyphenyl)imidazo[1,2-*a*]pyridin-3-yl]disulfane (2d):**

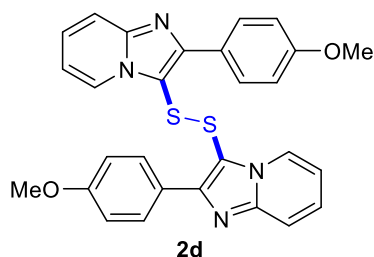

Following **GP1** using 2-(4-methoxyphenyl)imidazo[1,2-*a*]pyridine **1d** (112.1 mg, 0.5 mmol),  $S_8$  (160.0 mg, 5 mmol) and diethyl phosphite (34.5 mg, 32  $\mu$ L, 0.25 mmol) for 22 h. Purified by flash column chromatography (silica gel, 50% EtOAc in petether) yielded title compound **2d** as a yellow solid (168.5 mg, 66%); **mp**: 209-211  $^{\circ}$ C [Lit.<sup>3</sup> 211-213  $^{\circ}$ C];  **$^1$ H NMR** (400 MHz,  $CDCl_3$ )  $\delta$  8.13 (d,  $J = 6.1$  Hz, 2H), 7.59 (app. bs, 4H), 7.32 (d,  $J = 7.4$  Hz, 2H), 7.21–7.16 (m, 2H), 6.76

(t,  $J = 6.7$  Hz, 2H), 6.60 (d,  $J = 6.3$  Hz, 4H), 3.78 (s, 6H); **LCMS** (ESI,  $M+H^+$ ): 511.20. These data are consistent with literature values.<sup>3</sup>

**1,2-Bis[2-(2-bromophenyl)imidazo[1,2-*a*]pyridin-3-yl]disulfane (2e):**

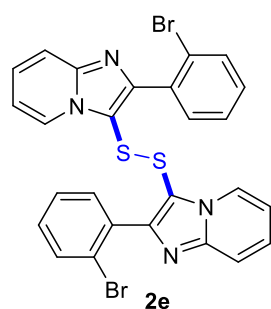

Following **GP1** using 2-(2-bromophenyl)imidazo[1,2-*a*]pyridine **1e** (136.5 mg, 0.5 mmol),  $S_8$  (160.0 mg, 5.0 mmol) and diethyl phosphite (34.5 mg, 32  $\mu$ L, 0.25 mmol) for 22 h. Purified by flash column chromatography (silica gel, 40% EtOAc in petether) yielded title compound **2e** as a yellow solid (164.2 mg, 54%); **mp**: 235-237  $^{\circ}$ C;  **$^1$ H NMR** (400 MHz,  $CDCl_3$ )  $\delta$  8.11 (d,  $J = 6.4$  Hz, 2H), 7.64 (app. bs, 4H), 7.36 (d,  $J = 8.0$  Hz, 2H), 7.21 (t,  $J = 7.28$  Hz, 2H), 7.14–7.08 (m, 4H), 6.75 (t,  $J = 6.5$  Hz, 2H);  **$^{13}C$  NMR** (101 MHz,  $CDCl_3$ )  $\delta$  147.4, 132.1, 128.3, 128.0(3C) 127.8(2C), 127.1, 124.5,

117.8(2C), 113.1; **HRMS** (ESI-TOF) calculated for  $C_{26}H_{17}Br_2N_4S_2$  [ $M+H^+$ ]:  $m/z$  606.9256; found 606.9261.

**1,2-Bis[2-(3-bromophenyl)imidazo[1,2-a]pyridin-3-yl]disulfane (2f):**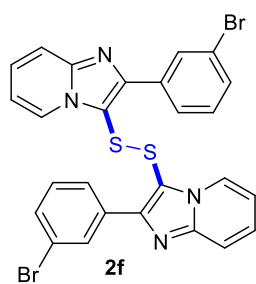

Following **GP1** using 2-(3-bromophenyl)imidazo[1,2-a]pyridine **1f** (136.5 mg, 0.5 mmol), S<sub>8</sub> (160.0 mg, 5.0 mmol) and diethyl phosphite (34.5 mg, 32 μL, 0.25 mmol) for 22 h. Purified by flash column chromatography (silica gel, 40% EtOAc in petether) yielded title compound **2f** as a yellow solid (206.8 mg, 68%); **mp**: 150-152 °C; **<sup>1</sup>H NMR** (400 MHz, CDCl<sub>3</sub>) δ 8.21 (s, 2H), 7.64 (s, 2H), 7.49 (s, 2H), 7.35 (s, 2H), 7.26 (t, *J* = 7.2 Hz, 2H), 7.18 (s, 2H), 6.89 (d, *J* = 5.7 Hz, 4H); **<sup>13</sup>C NMR** (101 MHz, CDCl<sub>3</sub>) δ 147.5, 133.7, 131.0, 130.4, 129.2, 127.7(2C), 126.5, 124.7, 121.8, 117.8, 113.8(2C); **HRMS** (ESI-TOF) calculated for C<sub>26</sub>H<sub>17</sub>Br<sub>2</sub>N<sub>4</sub>S<sub>2</sub> [M+H]<sup>+</sup>: *m/z* 606.9256; found 606.9255.

**1,2-Bis[2-(3-methoxyphenyl)imidazo[1,2-a]pyridin-3-yl]disulfane (2g):**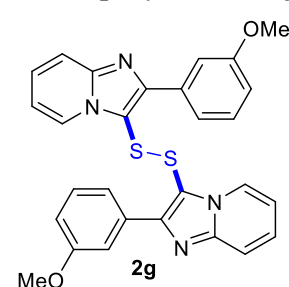

Following **GP1** using 2-(3-methoxyphenyl)imidazo[1,2-a]pyridine **1g** (112.1 mg, 0.5 mmol), S<sub>8</sub> (160.0 mg, 5.0 mmol) and diethyl phosphite (34.5 mg, 32 μL, 0.25 mmol) for 22 h. Purified by flash column chromatography (silica gel, 50% EtOAc in petether) yielded title compound **2g** as a yellow solid (160.1 mg, 63%); **mp**: 141-143 °C; **<sup>1</sup>H NMR** (400 MHz, CDCl<sub>3</sub>) δ 8.11 (d, *J* = 6.5 Hz, 2H), 7.37 (d, *J* = 8.3 Hz, 2H), 7.23-7.19 (m, 6H), 6.97 (t, *J* = 6.9 Hz, 2H), 6.75 (td, *J* = 6.8, 1.0 Hz, 2H), 6.67 (d, *J* = 7.3 Hz, 2H), 3.81 (s, 6H); **<sup>13</sup>C NMR** (101 MHz, CDCl<sub>3</sub>) δ 158.8, 147.4, 133.2, 128.6, 127.2, 124.5, 120.7, 117.6(2C), 114.8, 113.1, 112.6, 55.2(2C); **HRMS** (ESI-TOF) calculated for C<sub>28</sub>H<sub>23</sub>N<sub>4</sub>O<sub>2</sub>S<sub>2</sub> [M+H]<sup>+</sup>: *m/z* 511.1262, found 511.1244.

**1,2-Bis[2-(thiophen-2-yl)imidazo[1,2-a]pyridin-3-yl]disulfane (2h):**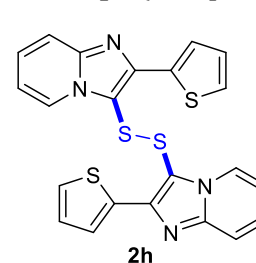

Following **GP1** using 2-(thiophen-2-yl)imidazo[1,2-a]pyridine **1h** (100.1 mg, 0.5 mmol), S<sub>8</sub> (160.0 mg, 5.0 mmol) and diethyl phosphite (34.5 mg, 32 μL, 0.25 mmol) for 22 h. Purified by flash column chromatography (silica gel, 40% EtOAc in petether) yielded title compound **2h** as a yellow color solid (171.2 mg, 74%); **mp**: 179-181 °C; **<sup>1</sup>H NMR** (400 MHz, CDCl<sub>3</sub>) δ 8.04 (d, *J* = 6.7 Hz, 2H), 7.60-7.49 (m, 2H), 7.40 (s, 2H), 7.25-7.20 (m, 2H), 7.17-7.07 (m, 2H), 6.74 (t, *J* = 6.7 Hz, 4H); **<sup>13</sup>C NMR** (101 MHz, CDCl<sub>3</sub>) δ 147.7, 127.5, 127.3, 126.8, 126.5, 124.4(3C), 117.4, 113.4(2C); **HRMS** (ESI-TOF) calculated for C<sub>22</sub>H<sub>15</sub>N<sub>4</sub>S<sub>4</sub> [M+H]<sup>+</sup>: *m/z* 463.0180; found 463.0174.

**1,2-Bis(8-methyl-2-phenylimidazo[1,2-a]pyridin-3-yl)disulfane (2i):**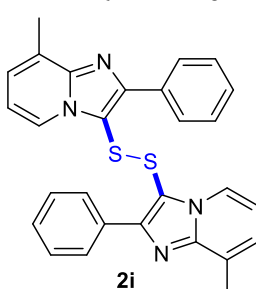

Following **GP1** using 8-methyl-2-phenylimidazo[1,2-a]pyridine **1i** (104.1 mg, 0.5 mmol), S<sub>8</sub> (160.0 mg, 5 mmol) and diethyl phosphite (34.5 mg, 32 μL, 0.25 mmol) for 22 h. Purified by flash column chromatography (silica gel, 40% EtOAc in petether) yielded title compound **2i** as a yellow color solid (196.2 mg, 82%); **mp**: 137-139 °C; **<sup>1</sup>H NMR** (400 MHz, CDCl<sub>3</sub>) δ 8.03 (d, *J* = 5.7 Hz, 2H), 7.55 (app. bs, 4H), 7.07-6.99 (m, 6H), 6.96 (d, *J* = 6.9 Hz, 2H), 6.67 (t, *J* = 6.8 Hz, 2H), 2.47 (s, 6H); **<sup>13</sup>C NMR** (101 MHz, CDCl<sub>3</sub>) δ 153.5, 147.7, 132.3, 127.9, 127.6, 127.5, 127.3, 126.0(2C), 122.5, 113.0(2C), 16.9(2C); **HRMS** (ESI-TOF) calculated for C<sub>28</sub>H<sub>23</sub>N<sub>4</sub>S<sub>2</sub> [M+H]<sup>+</sup>: *m/z* 479.1364; found 479.1351.



**1,2-Bis(8-methyl-2-(*p*-tolyl)imidazo[1,2-*a*]pyridin-3-yl)disulfane (2j):**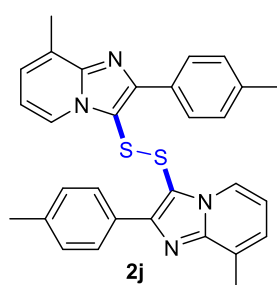

Following **GP1** using 8-methyl-2-(*p*-tolyl)imidazo[1,2-*a*]pyridine **1j** (111.1 mg, 0.5 mmol), S<sub>8</sub> (160.0 mg, 5.0 mmol) and diethyl phosphite (34.5 mg, 32  $\mu$ L, 0.25 mmol) for 22 h. Purified by flash column chromatography (silica gel, 40% EtOAc in petether) yielded title compound **2j** as a yellow solid (169.7 mg, 67%); **mp**: 177-179  $^{\circ}$ C [Lit.<sup>3</sup> 178-180  $^{\circ}$ C]; **<sup>1</sup>H NMR** (400 MHz, CDCl<sub>3</sub>)  $\delta$  8.05 (d, *J* = 4.7 Hz, 2H), 7.45 (app. bs, 4H), 6.92 (d, *J* = 6.6 Hz, 2H), 6.81 (d, *J* = 5.1 Hz, 4H), 6.68 (t, *J* = 6.7 Hz, 2H), 2.46 (s, 6H), 2.23 (s, 6H); **LCMS** (ESI, *M*+*H*<sup>+</sup>): 507.20. *These data are consistent with literature values.*<sup>3</sup>

**1,2-Bis(8-methyl-2-(naphthalen-2-yl)imidazo[1,2-*a*]pyridin-3-yl)disulfane (2k):**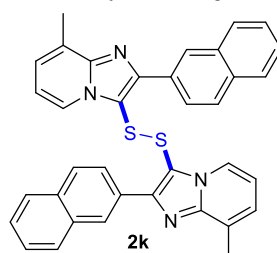

Following **GP1** using 8-methyl-2-(naphthalen-2-yl)imidazo[1,2-*a*]pyridine **1k** (129.1 mg, 0.5 mmol), S<sub>8</sub> (160.0 mg, 5.0 mmol) and diethyl phosphite (34.5 mg, 32  $\mu$ L, 0.25 mmol) for 22 h. Purified by flash column chromatography (silica gel, 40% EtOAc in petether) yielded title compound **2k** as a yellow solid (173.6 mg, 60 %); **mp**: 195-197 $^{\circ}$ C; **<sup>1</sup>H NMR** (400 MHz, CDCl<sub>3</sub>)  $\delta$  8.09 (d, *J* = 16.6 Hz, 4H), 7.79 (d, *J* = 6.6 Hz, 2H), 7.70 (d, *J* = 7.4 Hz, 4H), 7.50 (d, *J* = 7.6 Hz, 2H), 7.41 (app. bs, 4H), 6.52 (t, *J* = 6.7 Hz, 2H), 6.41 (bs, 2H), 2.03 (s, 6H); **<sup>13</sup>C NMR** (101 MHz, CDCl<sub>3</sub>)  $\delta$  147.4, 133.0, 132.7, 129.5, 128.8, 127.30(2C), 127.28, 126.9, 126.7, 126.1(2C), 126.0, 125.6, 125.5, 122.2, 113.1, 16.3; **HRMS** (ESI-TOF) calculated for C<sub>36</sub>H<sub>27</sub>N<sub>4</sub>S<sub>2</sub> [*M*+*H*<sup>+</sup>]: *m/z* 579.1677; found 579.1663.

**1,2-Bis(7-methyl-2-phenylimidazo[1,2-*a*]pyridin-3-yl)disulfane (2l):**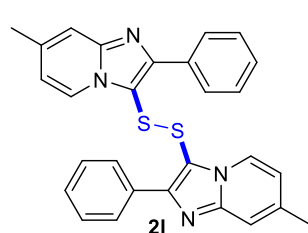

Following **GP1** using 7-methyl-2-phenylimidazo[1,2-*a*]pyridine **1l** (104.1 mg, 0.5 mmol), S<sub>8</sub> (160.0 mg, 5.0 mmol) and diethyl phosphite (34.5 mg, 32  $\mu$ L, 0.25 mmol) for 22 h. Purified by flash column chromatography (silica gel, 40% EtOAc in petether) yielded title compound **2l** as a yellow color solid (186.6 mg, 78%); **mp**: 219-225  $^{\circ}$ C [Lit.<sup>3</sup> 224-225  $^{\circ}$ C]; **<sup>1</sup>H NMR** (400 MHz, CDCl<sub>3</sub>)  $\delta$  7.92 (d, *J* = 6.8 Hz, 2H), 7.63 (app. bs, 4H), 7.16-7.04 (m, 8H), 6.53 (dd, *J* = 6.9, 1.2 Hz, 2H), 2.36 (s, 6H); **LCMS** (ESI, *M*+*H*<sup>+</sup>): 479.15. *These data are consistent with literature values.*<sup>3</sup>

**1,2-Bis(7-methyl-2-(*p*-tolyl)imidazo[1,2-*a*]pyridin-3-yl)disulfane (2m):**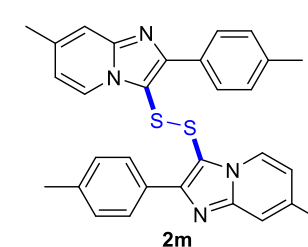

Following **GP1** using 7-methyl-2-(*p*-tolyl)imidazo[1,2-*a*]pyridine **1m** (111.1 mg, 0.5 mmol), S<sub>8</sub> (160.0 mg, 5.0 mmol) and diethyl phosphite (34.5 mg, 32  $\mu$ L, 0.25 mmol) for 22 h. Purified by flash column chromatography (silica gel, 40% EtOAc in petether) yielded title compound **2m** as a Yellow solid (220.4 mg, 87%); **mp**: 216-218  $^{\circ}$ C; **<sup>1</sup>H NMR** (400 MHz, CDCl<sub>3</sub>)  $\delta$  7.95 (d, *J* = 6.4 Hz, 2H), 7.56 (app. bs, 4H), 7.07 (s, 2H), 6.89 (d, *J* = 4.7 Hz, 4H), 6.55 (d, *J* = 6.4 Hz, 2H), 2.37 (s, 6H), 2.28 (s, 6H); **<sup>13</sup>C NMR** (101 MHz, CDCl<sub>3</sub>)  $\delta$  147.8, 138.2, 137.9, 129.4, 128.3, 127.8(3C), 123.8, 116.1, 115.4, 21.5(2C), 21.4(2C); **HRMS** (ESI-TOF) calculated for C<sub>30</sub>H<sub>27</sub>N<sub>4</sub>S<sub>2</sub> [*M*+*H*<sup>+</sup>]: *m/z* 507.1677; found 507.1663.



**1,2-Bis(6-chloro-2-phenylimidazo[1,2-a]pyridin-3-yl)disulfane (2n):**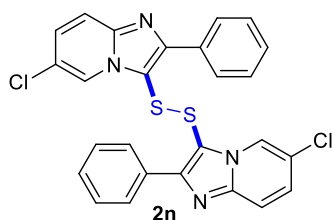

Following **GP1** using 6-chloro-2-phenylimidazo[1,2-a]pyridine **1n** (114.3 mg, 0.5 mmol), S<sub>8</sub> (160.0 mg, 5.0 mmol) and diethyl phosphite (34.5 mg, 32 μL, 0.25 mmol) for 22 h. Purified by flash column chromatography (silica gel, 40% EtOAc in petether) yielded title compound **2n** as a light yellow solid (155.8 mg, 60%); **mp**: 241-243 °C; <sup>1</sup>H NMR (400 MHz, CDCl<sub>3</sub>) δ 8.13 (s, 2H), 7.59–7.44 (app. bs, 4H), 7.21–7.03 (m, 10H); <sup>13</sup>C NMR (101 MHz, CDCl<sub>3</sub>) δ 145.8, 131.2, 128.4(2C), 127.9(2C), 127.73, 127.71, 122.8, 121.7, 118.2(3C); **HRMS** (ESI-TOF) calculated for C<sub>26</sub>H<sub>17</sub>Cl<sub>2</sub>N<sub>4</sub>S<sub>2</sub> [M+H]<sup>+</sup>: *m/z* 519.0272; found 519.0259.

**1,2-Bis(6-bromo-2-phenylimidazo[1,2-a]pyridin-3-yl)disulfane (2o):**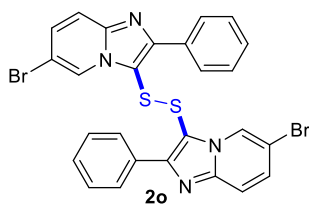

Following **GP1** using 6-bromo-2-phenylimidazo[1,2-a]pyridine **1o** (136.5 mg, 0.5 mmol), S<sub>8</sub> (160.0 mg, 5.0 mmol) and diethyl phosphite (34.5 mg, 32 μL, 0.25 mmol) for 22 h. Purified by flash column chromatography (silica gel, 40% EtOAc in petether) yielded title compound **2o** in traces, instead corresponding sulfide **3o** was isolated.

**1,2-Bis(2-((E)-styryl)imidazo[1,2-a]pyridin-3-yl)disulfane (2p):**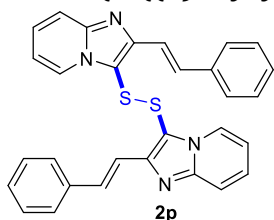

Following **GP1** using (*E*)-2-styrylimidazo[1,2-a]pyridine **1p** (110.1 mg, 0.5 mmol), S<sub>8</sub> (160.0 mg, 5.0 mmol) and diethyl phosphite (34.5 mg, 32 μL, 0.25 mmol) for 22 h. Purified by flash column chromatography (silica gel, 40% EtOAc in petether) yielded title compound **2p** in traces and undesired product was isolated.

**1,2-Bis(6-phenylimidazo[2,1-b]thiazol-5-yl)disulfane (2q):**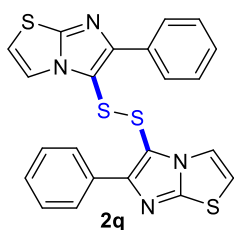

Following **GP1** using 6-phenylimidazo[2,1-b]thiazole **1q** (100.1 mg, 0.5 mmol), S<sub>8</sub> (160.0 mg, 5.0 mmol) and diethyl phosphite (34.5 mg, 32 μL, 0.25 mmol) for 22 h. Purified by flash column chromatography (silica gel, 40% EtOAc in petether) yielded title compound **2q** as a light yellow solid (120.2 mg, 52 %); **mp**: 179-181 °C [Lit.<sup>3</sup> 177-179 °C]; <sup>1</sup>H NMR (400 MHz, CDCl<sub>3</sub>) δ 7.78–7.76 (m, 4H), 7.28–7.23 (m, 6H), 7.12 (d, *J* = 4.4 Hz, 2H), 6.68 (d, *J* = 4.4 Hz, 2H); **LCMS** (ESI, M+H<sup>+</sup>): 463.00.

These data are consistent with literature values.<sup>3</sup>

**1,2-Bis(2-phenylbenzo[d]imidazo[2,1-b]thiazol-3-yl)disulfane (2r):**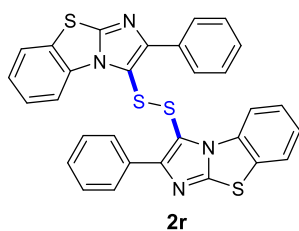

Following **GP1** using 2-phenylbenzo[d]imidazo[2,1-b]thiazole **1r** (100.1 mg, 0.5 mmol), S<sub>8</sub> (160.0 mg, 5.0 mmol) and diethyl phosphite (34.5 mg, 32 μL, 0.25 mmol) for 22 h. Purified by flash column chromatography (silica gel, 40% EtOAc in petether) yielded title compound **2r** as an impure (<20%).

### General Procedure-2 (GP2) for synthesis of bis(imidazoheterocycle)-sulfanes:

A heat gun-dried Schlenk tube was charged imidazoheterocycles (0.5 mmol, 1.0 equiv), S<sub>8</sub> (0.5 mmol, 1.0 equiv) and diethyl phosphite (0.5 mmol, 1.0 equiv) in DMSO (2.5 mL). The reaction mixture was stirred at 120 °C for 5 h and monitored by TLC either complete or appeared to be proceeding no further progress. The mixture was quenched by addition of water (10 mL) followed by extraction with EtOAc (3x10 mL). The combined organic layers were washed with brine (2x10 mL), dried over anhydrous Na<sub>2</sub>SO<sub>4</sub>, and the solvent was removed under reduced pressure. The resulting residue was subjected to flash chromatography (silica gel, eluted with 30-40% ethyl acetate/petether) to afford the corresponding sulfanes.

#### Bis[2-phenylimidazo[1,2-a]pyridin-3-yl]sulfane (3a):

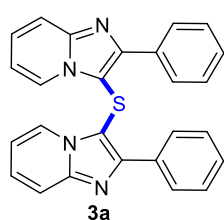

Following **GP2** using 2-phenylimidazo[1,2-a]pyridine **1a** (97.1 mg, 0.5 mmol), S<sub>8</sub> (16.0 mg, 0.5 mmol) and diethyl phosphite (69.0 mg, 65 μL, 0.5 mmol) for 5 h. Purified by flash column chromatography (silica gel, 40% EtOAc in petether) yielded title compound **3a** as a light yellow solid (171.5 mg, 82%); **mp**: 253-255 °C [Lit.<sup>4</sup> 251-252 °C]; **<sup>1</sup>H NMR** (400 MHz, CDCl<sub>3</sub>) δ 8.12–8.08 (m, 4H), 7.64–7.59 (m, 4H), 7.58–7.54 (m, 4H), 7.51–7.49 (m, 2H), 7.12–7.08 (m, 2H), 6.34 (td, *J* = 6.8, 1.1 Hz, 2H); **<sup>13</sup>C NMR** (101 MHz, CDCl<sub>3</sub>) δ 150.9, 146.6, 133.9, 129.6(2C), 129.0, 128.7(2C), 126.4, 125.4, 117.4, 112.6, 107.5; **LCMS** (ESI, *M+H*<sup>+</sup>): 419.10. These data are consistent with literature values.<sup>4</sup>

**Gram-Scale Reaction:** Following **GP2** using 2-phenylimidazo[1,2-a]pyridine **1a** (1.16 g, 6.0 mmol), S<sub>8</sub> (192 mg, 6.0 mmol) and diethyl phosphite (828.0 mg, 0.77 mL, 6.0 mmol) in DMSO (25 mL) for 6 h. Purification by flash column chromatography (silica gel, 40% EtOAc in petether) yielded title compound **2a** (1.97 g, 78%) as a light yellow solid.

#### Bis[2-(*p*-tolyl)imidazo[1,2-a]pyridin-3-yl]sulfane (3b):

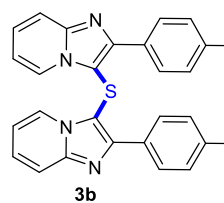

Following **GP2** using 2-(*p*-tolyl)imidazo[1,2-a]pyridine **1b** (104.1 mg, 0.5 mmol), S<sub>8</sub> (16.0 mg, 0.5 mmol) and diethyl phosphite (69.0 mg, 0.5 mmol) for 5 h. Purified by flash column chromatography (silica gel, 30% EtOAc in petether) yielded title compound **3b** as a light yellow solid (177.1 mg, 77%); **mp**: 259-261 °C [Lit.<sup>4</sup> 263-264 °C]; **<sup>1</sup>H NMR** (400 MHz, CDCl<sub>3</sub>) δ 8.01 (d, *J* = 8.1 Hz, 4H), 7.59 (d, *J* = 6.9 Hz, 2H), 7.48 (d, *J* = 9.0 Hz, 2H), 7.41 (d, *J* = 7.9 Hz, 4H), 7.10–7.06 (m, 2H), 6.35 (td, *J* = 6.8, 1.1 Hz, 2H), 2.51 (s, 6H). **LCMS** (ESI, *M*<sup>+</sup>): 446.11. These data are consistent with literature values.<sup>4</sup>

#### Bis[2-(4-chlorophenyl)imidazo[1,2-a]pyridin-3-yl]sulfane (3c):

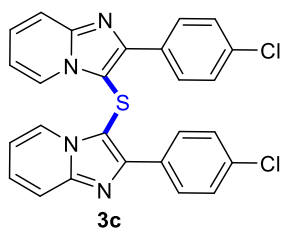

Following **GP2** using 2-(4-chlorophenyl)imidazo[1,2-a]pyridine **1c** (114.3 mg, 0.5 mmol), S<sub>8</sub> (16.0 mg, 0.5 mmol) and diethyl phosphite (69.0 mg, 0.5 mmol) for 5 h. Purified by flash column chromatography (silica gel, 40% EtOAc in petether) yielded title compound **3c** as a light yellow color solid (155.9 mg, 64%); **mp**: 293-295 °C [Lit.<sup>4</sup> 296-297 °C]; **<sup>1</sup>H NMR** (400 MHz, CDCl<sub>3</sub>) δ 8.08 (d, *J* = 8.4 Hz, 4H), 7.61–7.57 (m, 6H), 7.52 (d, *J* = 9.0 Hz, 2H), 7.15 (t, *J* = 7.4 Hz, 2H), 6.46 (t, *J* = 6.7 Hz, 2H); **LCMS** (ESI, *M*<sup>+</sup>): 487.10. These data are consistent with literature values.<sup>4</sup>

**Bis[2-(4-methoxyphenyl)imidazo[1,2-a]pyridin-3-yl]sulfane (3d):**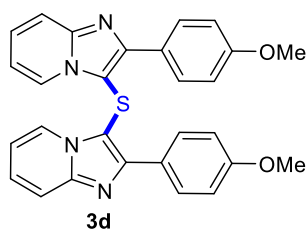

Following **GP2** using 2-(4-methoxyphenyl)imidazo[1,2-a]pyridine **1d** (112.1 mg, 0.5 mmol),  $S_8$  (16.0 mg, 0.5 mmol) and diethyl phosphite (69.0 mg, 65  $\mu$ L, 0.5 mmol) for 5 h. Purified by flash column chromatography (silica gel, 40% EtOAc in petether) yielded title compound **3d** as a brown solid (155.5 mg, 65%); mp: 222-224  $^{\circ}$ C [Lit.<sup>4</sup> 224-225  $^{\circ}$ C];  $^1\text{H NMR}$  (400 MHz,  $\text{CDCl}_3$ )  $\delta$  8.09–8.07 (m, 4H), 7.61 (d,  $J$  = 6.9 Hz, 2H), 7.47 (d,  $J$  = 9.0 Hz, 2H), 7.15–7.11 (m, 4H), 7.10–7.06 (m, 2H), 6.39 (td,  $J$  = 6.9, 1.0 Hz, 2H), 3.94 (s, 6H); **LCMS** (ESI,  $M+H^+$ ): 479.13. These data are consistent with literature values.<sup>4</sup>

**Bis[2-(3-methoxyphenyl)imidazo[1,2-a]pyridin-3-yl]sulfane (3g):**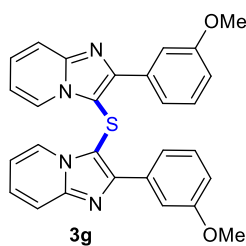

Following **GP2** using 2-(3-methoxyphenyl)imidazo[1,2-a]pyridine **1g** (112.1 mg, 0.5 mmol),  $S_8$  (16.0 mg, 0.5 mmol) and diethyl phosphite (69.0 mg, 65  $\mu$ L, 0.5 mmol) for 5 h. Purified by flash column chromatography (silica gel, 40% EtOAc in petether) yielded title compound **3g** as a yellow color solid (186.6 mg, 78%); mp: 149-151  $^{\circ}$ C [Lit.<sup>4</sup> 153-154  $^{\circ}$ C];  $^1\text{H NMR}$  (400 MHz,  $\text{CDCl}_3$ )  $\delta$  7.72 (d,  $J$  = 7.5 Hz, 2H), 7.65–7.60 (m, 4H), 7.54–7.49 (m, 4H), 7.12–7.09 (m, 4H), 6.39 (t,  $J$  = 6.7 Hz, 2H), 3.94 (s, 6H). **LCMS** (ESI,  $M+H^+$ ): 479.19. These data are consistent with literature values.<sup>4</sup>

**Bis[2-(thiophen-2-yl)imidazo[1,2-a]pyridin-3-yl]sulfane (3h):**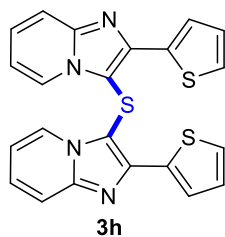

Following **GP2** using 2-(thiophen-2-yl)imidazo[1,2-a]pyridine **1h** (100.1 mg, 0.5 mmol),  $S_8$  (16.0 mg, 0.5 mmol) and diethyl phosphite (69.0 mg, 65  $\mu$ L, 0.5 mmol) for 5 h. Purified by flash column chromatography (silica gel, 40% EtOAc in petether) yielded title compound **3h** as a yellow color solid (157.1 mg, 73%); mp: 211-213  $^{\circ}$ C;  $^1\text{H NMR}$  (400 MHz,  $\text{CDCl}_3$ )  $\delta$  8.15 (d,  $J$  = 3.5 Hz, 2H), 7.93 (d,  $J$  = 6.8 Hz, 2H), 7.55–7.49 (m, 4H), 7.28 (t,  $J$  = 4.2 Hz, 2H), 7.12 (t,  $J$  = 7.7 Hz, 2H), 6.54 (t,  $J$  = 6.8 Hz, 2H);  $^{13}\text{C NMR}$  (101 MHz,  $\text{CDCl}_3$ )  $\delta$  146.9, 145.3, 136.6, 128.0, 127.5(2C), 126.8, 125.3, 117.4, 113.3, 104.6; **HRMS** (ESI-TOF) calculated for  $\text{C}_{22}\text{H}_{15}\text{N}_4\text{S}$  [ $M+H^+$ ]:  $m/z$  431.0459; found 431.0443.

**Bis(8-methyl-2-phenylimidazo[1,2-a]pyridin-3-yl)sulfane (3i):**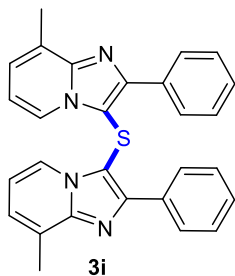

Following **GP2** using 8-methyl-2-phenylimidazo[1,2-a]pyridine **1i** (104.1 mg, 0.5 mmol),  $S_8$  (16.0 mg, 0.5 mmol) and diethyl phosphite (69.0 mg, 65  $\mu$ L, 0.5 mmol) for 5 h. Purified by flash column chromatography (silica gel, 40% EtOAc in petether) yielded title compound **3i** as a brown color solid (136.2 mg, 61%); mp: 214-216  $^{\circ}$ C [Lit.<sup>4</sup> 216-217  $^{\circ}$ C];  $^1\text{H NMR}$  (400 MHz,  $\text{CDCl}_3$ )  $\delta$  8.01 (d,  $J$  = 8.1 Hz, 4H), 7.59 (d,  $J$  = 6.9 Hz, 2H), 7.48 (d,  $J$  = 9.0 Hz, 2H), 7.41 (d,  $J$  = 7.9 Hz, 4H), 7.09–7.05 (m, 2H), 6.35 (td,  $J$  = 6.8, 0.9 Hz, 2H), 2.51 (s, 6H); **LCMS** (ESI,  $M+H^+$ ): 447.20. These data are consistent with literature values.<sup>4</sup>

**Bis[8-methyl-2-(*p*-tolyl)imidazo[1,2-*a*]pyridin-3-yl]sulfane (3j):**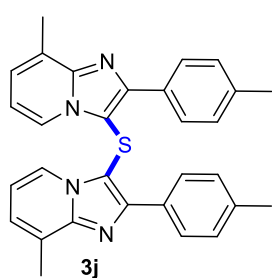

$M+H^+$ ): 475.20. These data are consistent with literature values.<sup>4</sup>

Following **GP2** using 8-methyl-2-(*p*-tolyl)imidazo[1,2-*a*]pyridine **1j** (111.1 mg, 0.5 mmol), **S<sub>8</sub>** (16.0 mg, 0.5 mmol) and diethyl phosphite (69.0 mg, 65  $\mu$ L, 0.5 mmol) for 5 h. Purified by flash column chromatography (silica gel, 40% EtOAc in petether) yielded title compound **3j** as a white color solid (151.7 mg, 64%); **mp**: 236-238 °C [Lit.<sup>4</sup> 239-240 °C]; **<sup>1</sup>H NMR** (400 MHz, CDCl<sub>3</sub>)  $\delta$  7.99 (d, *J* = 8.1 Hz, 4H), 7.46 (d, *J* = 6.8 Hz, 2H), 7.40 (d, *J* = 7.9 Hz, 4H), 6.86 (d, *J* = 6.9 Hz, 2H), 6.27 (t, *J* = 6.9 Hz, 2H), 2.51 (s, 12H); **LCMS** (ESI,

**Bis[8-methyl-2-(naphthalen-2-yl)imidazo[1,2-*a*]pyridin-3-yl]sulfane (3k):**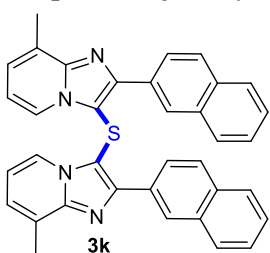

Following **GP2** using 8-methyl-2-(naphthalen-2-yl)imidazo[1,2-*a*]pyridine **1k** (129.1 mg, 0.5 mmol), **S<sub>8</sub>** (16.0 mg, 0.5 mmol) and diethyl phosphite (69.0 mg, 65  $\mu$ L, 0.5 mmol) for 5 h. Purified by flash column chromatography (silica gel, 40% EtOAc in petether) yielded title compound **3k** as a yellow color (224.1 mg, 82%); **mp**: 199-201 °C; **<sup>1</sup>H NMR** (400 MHz, CDCl<sub>3</sub>)  $\delta$  8.62 (s, 2H), 8.28 (dd, *J* = 8.5, 1.7 Hz, 2H), 8.08 (d, *J* = 8.6 Hz, 2H), 8.06–8.02 (m, 2H), 8.01–7.97 (m, 2H), 7.61–7.58 (m, 4H), 7.42 (d, *J* = 6.8 Hz, 2H), 6.83 (d, *J* = 6.9 Hz, 2H), 6.06 (t, *J* = 6.9 Hz, 2H), 2.53 (s, 6H); **<sup>13</sup>C NMR** (101 MHz, CDCl<sub>3</sub>)  $\delta$  150.4, 147.0, 133.53, 133.47, 131.7, 129.1, 128.8, 128.3, 128.0, 127.5, 127.4, 126.7, 126.5, 125.3, 123.3, 112.7, 107.9, 16.9; **HRMS** (ESI-TOF) calculated for C<sub>36</sub>H<sub>27</sub>N<sub>4</sub>S [M+H]<sup>+</sup>: *m/z* 547.1956; found 547.1948.

**Bis(7-methyl-2-phenylimidazo[1,2-*a*]pyridin-3-yl)sulfane (3l):**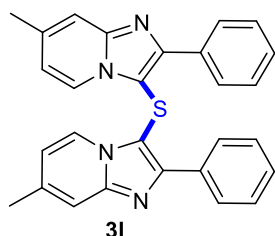

**LCMS** (ESI,  $M+H^+$ ): 447.15. These data are consistent with literature values.<sup>4</sup>

Following **GP2** using 7-methyl-2-phenylimidazo[1,2-*a*]pyridine **1l** (104.1 mg, 0.5 mmol), **S<sub>8</sub>** (16.0 mg, 0.5 mmol) and diethyl phosphite (69.0 mg, 65  $\mu$ L, 0.5 mmol) for 5 h. Purified by flash column chromatography (silica gel, 40% EtOAc in petether) yielded title compound **3l** as a yellow solid (196.4 mg, 88%); **mp**: 199-201 °C [Lit.<sup>4</sup> 197-198 °C]; **<sup>1</sup>H NMR** (400 MHz, CDCl<sub>3</sub>)  $\delta$  8.11–8.08 (m, 4H), 7.62–7.58 (m, 4H), 7.55–7.51 (m, 2H), 7.40 (tt, *J* = 7.2, 1.32 Hz, 2H), 7.24 (s, 2H), 6.17 (dd, *J* = 7.0, 1.6 Hz, 2H), 2.25 (s, 6H);

**Bis[7-methyl-2-(*p*-tolyl)imidazo[1,2-*a*]pyridin-3-yl]sulfane (3m):**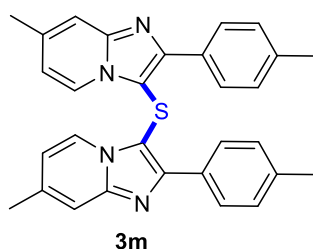

Following **GP2** using 7-methyl-2-(*p*-tolyl)imidazo[1,2-*a*]pyridine **1m** (111.1 mg, 0.5 mmol), **S<sub>8</sub>** (16.0 mg, 0.5 mmol) and diethyl phosphite (69.0 mg, 65  $\mu$ L, 0.5 mmol) for 5 h. Purified by flash column chromatography (silica gel, 40% EtOAc in petether) yielded title compound **3m** as a yellow color solid (161.3 mg, 68%); **mp**: 227-229 °C; **<sup>1</sup>H NMR** (400 MHz, CDCl<sub>3</sub>)  $\delta$  8.01 (d, *J* = 8.1 Hz, 4H), 7.44 (d, *J* = 7.1 Hz, 2H), 7.40 (d, *J* = 7.9 Hz, 4H), 7.23 (s, 2H), 6.19 (dd, *J* = 7.0, 1.6 Hz, 2H), 2.51 (s, 6H), 2.26 (s, 6H); **<sup>13</sup>C NMR** (101 MHz, CDCl<sub>3</sub>)  $\delta$  150.7, 147.0, 138.7, 137.5, 131.1, 129.39(2C), 129.36(2C), 124.7, 115.9, 115.2, 106.3, 21.6, 21.3; **HRMS** (ESI-TOF) calculated for C<sub>30</sub>H<sub>27</sub>N<sub>4</sub>S [M+H]<sup>+</sup>: *m/z* 475.1956; found 475.1945.



**Bis(6-chloro-2-phenylimidazo[1,2-a]pyridin-3-yl)sulfane (3n):**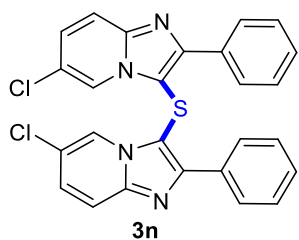

Following **GP2** using 6-chloro-2-phenylimidazo[1,2-a]pyridine **1n** (114.3 mg, 0.5 mmol), S<sub>8</sub> (16.0 mg, 0.5 mmol) and diethyl phosphite (69.0 mg, 65  $\mu$ L, 0.5 mmol) for 5 h. Purified by flash column chromatography (silica gel, 40% EtOAc in petether) yielded title compound **3n** as a white solid (155.9 mg, 64 %); **mp**: 239-241 °C; **<sup>1</sup>H NMR** (400 MHz, CDCl<sub>3</sub>)  $\delta$  8.08 (d, *J* = 7.1 Hz, 4H), 7.65 (t, *J* = 7.3 Hz, 4H), 7.59 (d, *J* = 7.3 Hz, 2H), 7.57 (d, *J* = 1.2 Hz, 2H), 7.45 (d, *J* = 9.4 Hz, 2H), 7.08 (dd, *J* = 9.4, 1.9 Hz, 2H); **<sup>13</sup>C NMR** (101 MHz, CDCl<sub>3</sub>)  $\delta$  152.0, 145.1, 133.1, 129.6, 129.4(2C), 129.2(2C), 128.1, 123.8, 121.4, 117.9, 107.8; **HRMS** (ESI-TOF) calculated for C<sub>26</sub>H<sub>17</sub>Cl<sub>2</sub>N<sub>4</sub>S [M+H]<sup>+</sup>: *m/z* 487.0551; found 487.0539.

**Bis(6-bromo-2-phenylimidazo[1,2-a]pyridin-3-yl)sulfane (3o):**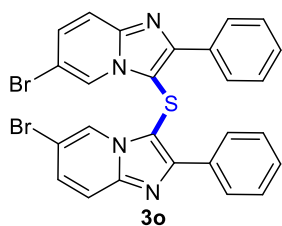

Following **GP1** using 6-bromo-2-phenyl-imidazo[1,2-a]pyridine **1o** (136.5 mg, 0.5 mmol), S<sub>8</sub> (16.0 mg, 0.5 mmol) and diethyl phosphite (69.0 mg, 65  $\mu$ L, 0.5 mmol) for 5 h. Purified by flash column chromatography (silica gel, 40% EtOAc in petether) yielded title compound **3o** as a white solid; (169.2 mg, 59%); **mp**: 250-252 °C; **<sup>1</sup>H NMR** (400 MHz, CDCl<sub>3</sub>)  $\delta$  8.12 (d, *J* = 7.1 Hz, 4H), 7.73 (d, *J* = 1.1 Hz, 2H), 7.66 (t, *J* = 7.4 Hz, 4H), 7.40 (tt, *J* = 7.6, 1.2, 2H), 7.41 (d, *J* = 9.8 Hz, 2H), 7.19 (dd, *J* = 9.4, 1.8 Hz, 2H); **<sup>13</sup>C NMR** (101 MHz, CDCl<sub>3</sub>)  $\delta$  151.7, 145.2, 133.0, 130.3, 129.7, 129.4(2C), 129.3(2C), 126.0, 118.2, 107.9, 107.4; **HRMS** (ESI-TOF) calculated for C<sub>26</sub>H<sub>17</sub>Br<sub>2</sub>N<sub>4</sub>S [M+H]<sup>+</sup>: *m/z* 573.9462; found 574.9535.

**Bis[2-[(E)-styryl]imidazo[1,2-a]pyridin-3-yl]sulfane (3p):**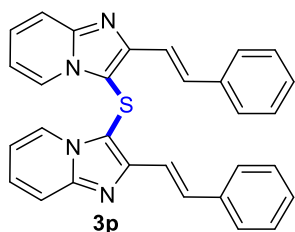

Following **GP2** using (*E*)-2-styrylimidazo[1,2-a]pyridine **1p** (110.1 mg, 0.5 mmol), S<sub>8</sub> (16.0 mg, 0.5 mmol) and diethyl phosphite (69.0 mg, 65  $\mu$ L, 0.5 mmol) for 5 h. Purified by flash column chromatography (silica gel, 40% EtOAc in petether) yielded title compound **3p** as a yellow color solid (152.9 mg, 65%); **mp**: 237-239 °C; **<sup>1</sup>H NMR** (400 MHz, CDCl<sub>3</sub>)  $\delta$  8.28 (d, *J* = 6.4 Hz, 2H), 7.81 (q, *J* = 16.0 Hz, 4H), 7.69 (d, *J* = 6.6 Hz, 4H), 7.56 (d, *J* = 8.8 Hz, 2H), 7.34 (d, *J* = 7.3 Hz, 6H), 7.22 (t, *J* = 7.8 Hz, 2H), 6.78 (t, *J* = 6.5 Hz, 2H); **<sup>13</sup>C NMR** (101 MHz, CDCl<sub>3</sub>)  $\delta$  148.7, 147.3, 136.9, 133.8, 129.0(2C), 128.6, 127.2(2C), 127.0, 124.4, 117.59, 117.56, 113.3, 107.6; **HRMS** (ESI-TOF) calculated for C<sub>30</sub>H<sub>23</sub>N<sub>4</sub>S [M+H]<sup>+</sup>: *m/z* 471.1643; found 471.1643.

**Bis(6-phenylimidazo[2,1-b]thiazol-5-yl)sulfane (3q):**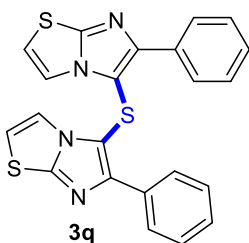

Following **GP2** using 6-phenylimidazo[2,1-b]thiazole **1q** (100.1 mg, 0.5 mmol), S<sub>8</sub> (16.0 mg, 0.5 mmol) and diethyl phosphite (69.0 mg, 65  $\mu$ L, 0.5 mmol) for 5 h. Purified by flash column chromatography (silica gel, 40% EtOAc in petether) yielded title compound **3q** as a light yellow solid (137.7 mg, 64%); **mp**: 227-229°C [Lit.<sup>4</sup> 230-231°C]; **<sup>1</sup>H NMR** (400 MHz, CDCl<sub>3</sub>)  $\delta$  8.08–8.06 (m, 4H), 7.56–7.53 (m, 4H), 7.46 (tt, *J* = 7.4, 1.2 Hz, 2H), 6.52 (d, *J* = 4.5 Hz, 2H), 6.48 (d, *J* = 4.5 Hz, 2H); **LCMS** (ESI, *M+H*<sup>+</sup>): 431.05. These data are consistent with literature values.<sup>4</sup>

**Bis(2-phenylbenzo[d]imidazo[2,1-b]thiazol-3-yl)sulfane (3r):**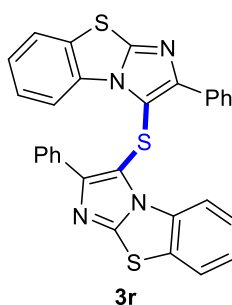

Following **GP2** using 2-phenylbenzo[d]imidazo[2,1-b]thiazole **1r** (125.1 mg, 0.5 mmol), S<sub>8</sub> (16.0 mg, 0.5 mmol) and diethyl phosphite (69.0 mg, 65 μL, 0.5 mmol) for 5 h. Purified by flash column chromatography (silica gel, 40% EtOAc in petether) yielded title compound **3r** as a light yellow solid (111.4 mg, 42%); **mp**: 251-253 °C; **<sup>1</sup>H NMR** (400 MHz, CDCl<sub>3</sub>) δ 7.95 (d, *J* = 7.8 Hz, 2H), 7.76–7.72 (m, 4H), 7.59 (dd, *J* = 8.0, 0.7 Hz, 2H), 7.28–7.26 (m, 6H), 7.24 (dd, *J* = 8.0, 1.1 Hz, 2H), 7.04 (m, 2H); **<sup>13</sup>C NMR** (101 MHz, CDCl<sub>3</sub>) δ 151.6, 149.7, 133.3, 133.2, 129.8, 128.8(2C), 128.5, 128.3(2C), 126.0, 124.9, 123.9,

114.9, 112.0; **HRMS** (ESI-TOF) calculated for C<sub>30</sub>H<sub>19</sub>N<sub>4</sub>S<sub>3</sub> [M+H]<sup>+</sup>: *m/z* 531.0772; found 531.0762.

**Bis[2-(2,4-dichlorophenyl)imidazo[1,2-a]pyridin-3-yl]sulfane (3s):**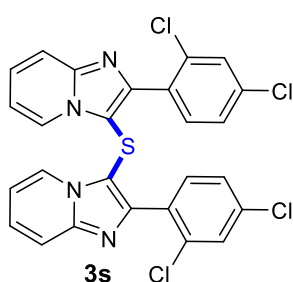

Following **GP2** using 2-(2,4-dichlorophenyl)imidazo[1,2-a]pyridine **1s** (131.5 mg, 0.5 mmol), S<sub>8</sub> (16.0 mg, 0.5 mmol) and diethyl phosphite (69.0 mg, 65 μL, 0.5 mmol) for 5 h. Purified by flash column chromatography (silica gel, 40% EtOAc in petether) yielded title compound **3s** as a light yellow solid (170.1 mg, 61%); **mp**: 157-159 °C; **<sup>1</sup>H NMR** (400 MHz, CDCl<sub>3</sub>) δ 7.61–7.58 (m, 4H), 7.56 (d, *J* = 9.0 Hz, 2H), 7.37 (d, *J* = 1.1 Hz, 4H), 7.25–7.21 (m, 2H), 6.63 (td, *J* = 6.8, 1.1 Hz, 2H); **<sup>13</sup>C NMR** (101 MHz, CDCl<sub>3</sub>) δ 148.0,

146.3, 135.7, 135.1, 133.5, 131.6, 129.9, 127.1, 126.4, 124.2, 117.9, 113.2, 109.9; **HRMS** (ESI-TOF) calculated for C<sub>26</sub>H<sub>15</sub>Cl<sub>4</sub>N<sub>4</sub>S [M+H]<sup>+</sup>: *m/z* 554.9766; found 554.9772.

**Bis[7-methyl-2-(thiophen-2-yl)imidazo[1,2-a]pyridin-3-yl]sulfane (3t):**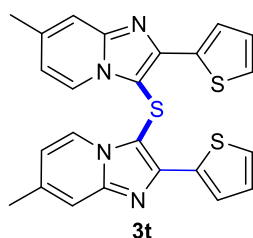

Following **GP2** using 7-methyl-2-(thiophen-2-yl)imidazo[1,2-a]pyridine **1t** (107.1 mg, 0.5 mmol), S<sub>8</sub> (16.0 mg, 0.5 mmol) and diethyl phosphite (69.0 mg, 65 μL, 0.5 mmol) for 5 h. Purified by flash column chromatography (silica gel, 40% EtOAc in petether) yielded title compound **3t** as a yellow color solid (126.1 mg, 55%); **mp**: 183-185 °C; **<sup>1</sup>H NMR** (400 MHz, CDCl<sub>3</sub>) δ 8.13 (s, 2H), 7.78 (d, *J* = 6.7 Hz, 2H), 7.53 (d, *J* = 4.4 Hz, 2H), 7.27 (app. bs, 4H), 6.38 (d, *J* =

6.6 Hz, 2H), 2.26 (s, 6H); **<sup>13</sup>C NMR** (101 MHz, CDCl<sub>3</sub>) δ 147.3, 145.0, 138.1, 136.8, 128.0, 127.24, 127.20, 124.5, 115.9(2C), 104.1, 21.4; **HRMS** (ESI-TOF) calculated for C<sub>24</sub>H<sub>19</sub>N<sub>4</sub>S<sub>3</sub> [M+H]<sup>+</sup>: *m/z* 459.0772; found 459.0756.

**Bis[7-methyl-2-(pyrimidin-2-yl)imidazo[1,2-a]pyridin-3-yl]sulfane (3u):**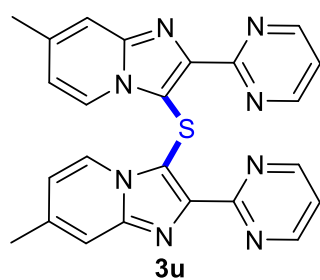

Following **GP2** using 7-methyl-2-(pyrimidin-2-yl)imidazo[1,2-a]pyridine **1u** (105.1 mg, 0.5 mmol), S<sub>8</sub> (16.0 mg, 0.5 mmol) and diethyl phosphite (69.0 mg, 65 μL, 0.5 mmol) for 5 h. Purified by flash column chromatography (silica gel, 50% EtOAc in petether) yielded title compound **3u** as a yellow color solid (123.8 mg, 55%); **mp**: 226-228 °C; **<sup>1</sup>H NMR** (400 MHz, CDCl<sub>3</sub>) δ 9.48 (d, *J* = 1.2 Hz, 2H), 8.63 (s, 2H), 8.58 (d, *J* = 2.4 Hz, 2H), 8.54 (d, *J* = 7.1 Hz, 2H), 7.33 (s, 2H), 6.51 (d, *J* = 7.0 Hz, 2H), 2.32 (s, 6H); **<sup>13</sup>C NMR** (101 MHz, CDCl<sub>3</sub>) δ 149.1, 147.2, 145.2, 145.0,

143.6, 143.5, 138.3, 125.3, 116.5, 116.1, 109.1, 21.4; **HRMS** (ESI-TOF) calculated for C<sub>24</sub>H<sub>19</sub>N<sub>8</sub>S [M+H]<sup>+</sup>: *m/z* 451.1453; found 451.1442.



**Bis{2-((E)-2-(2,6,6-trimethylcyclohex-1-en-1-yl)vinyl)imidazo[1,2-a]pyridin-3-yl}-sulfane (3v):**

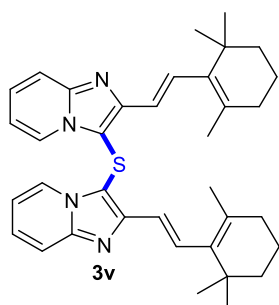

Following **GP2** using (E)-2-(2-(2,6,6-trimethylcyclohex-1-en-1-yl)vinyl)imidazo[1,2-a]pyridine **1v** (133.1 mg, 0.5 mmol), S<sub>8</sub> (16.0 mg, 0.5 mmol), diethyl phosphite (69.0 mg, 65  $\mu$ L, 0.5 mmol) for 5 h. Purified by flash column chromatography (silica gel, 40% EtOAc in petether) yielded title compound **3v** as a yellow color solid (132.2 mg, 47%); **mp**: 197-199  $^{\circ}$ C; **<sup>1</sup>H NMR** (400 MHz, CDCl<sub>3</sub>)  $\delta$  8.29 (d, *J* = 6.8 Hz, 2H), 7.52 (d, *J* = 9.0 Hz, 2H), 7.45 (d, *J* = 16.0 Hz, 2H), 7.20-7.16 (m, 2H), 7.09 (d, *J* = 16.0 Hz, 2H), 6.68 (td, *J* = 6.8, 1.0 Hz, 2H), 2.13 (t, *J* = 6.0 Hz, 4H), 1.94 (s, 6H), 1.70 (quintet, *J* = 6.4 Hz, 4H), 1.59-1.54 (m, 4H), 1.20 (s, 12H); **<sup>13</sup>C NMR** (101 MHz, CDCl<sub>3</sub>)  $\delta$  149.1, 147.2, 138.1, 133.6, 130.8, 126.6, 124.8, 122.5, 117.3, 112.7, 105.8, 39.7, 34.5, 33.2, 29.2(2C), 22.1, 19.4; **HRMS** (ESI-TOF) calculated for C<sub>36</sub>H<sub>43</sub>N<sub>4</sub>S [M+H]<sup>+</sup>: *m/z* 563.3208; found 563.3212.

**General Procedure-3 (GP3) for the synthesis of imidazo[1,2-a]pyridine-indole derived sulfanes:**

A heat gun-dried Schlenk tube was charged 1,2-bis(2-phenylimidazo[1,2-a]pyridin-3-yl)disulfane (0.5 mmol, 1.0 equiv), substituted indoles (0.75 mmol, 1.5 equiv) and diethyl phosphite (0.5 mmol, 1.0 equiv) in DMSO (2.5 mL). The reaction mixture was stirred at 120  $^{\circ}$ C for 15 h and monitored by TLC either complete or appeared to be proceeding no further progress. The mixture was quenched by addition of water (10 mL) followed by extraction with EtOAc (3x10 mL). The combined organic layers was washed with brine (2x10 mL), dried over anhydrous Na<sub>2</sub>SO<sub>4</sub>, and the solvent was removed under reduced pressure. The resulting residue was subjected to flash chromatography (silica gel, eluted with 30-40% ethyl acetate/petether) to afford the corresponding imidazo[1,2-a]pyridine-indole derived thioethers.

**3-[(1H-Indol-3-yl)thio]-2-phenylimidazo[1,2-a]pyridine (5aa):**

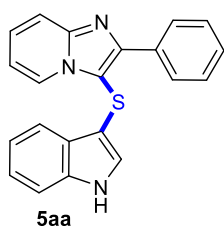

Following **GP3** using 1,2-bis(2-phenylimidazo[1,2-a]pyridin-3-yl)disulfane **2a** (225.3 mg, 0.5 mmol), 1H-indole **4a** (87.8 mg, 0.75 mmol) and diethyl phosphite (69.0 mg, 65  $\mu$ L, 0.5 mmol) for 15 h. Purified by flash column chromatography (silica gel, 40% EtOAc in petether) yielded title compound **5aa** as a light yellow solid (126.3 mg, 74%); **mp**: 220-222  $^{\circ}$ C; [Lit.<sup>5</sup> 219-221  $^{\circ}$ C]; **<sup>1</sup>H NMR** (400 MHz, CDCl<sub>3</sub>)  $\delta$  8.60 (dt, *J* = 6.8, 1.1 Hz, 1H), 8.36-8.34 (m, 2H), 8.27 (s, 1H), 7.62 (d, *J* = 9.0 Hz, 1H), 7.53 (t, *J* = 7.5 Hz, 2H), 7.46-7.42 (m, 1H), 7.36 (d, *J* = 8.0 Hz, 1H), 7.24-7.21 (m, 1H), 7.19 (d, *J* = 2.6 Hz, 1H), 7.16-7.12 (m, 1H), 7.02-6.98 (m, 1H), 6.87 (td, *J* = 6.8, 1.1 Hz, 1H); **HRMS** (ESI-TOF) calculated for C<sub>21</sub>H<sub>16</sub>N<sub>3</sub>S [M+H]<sup>+</sup>: *m/z* 342.1059; found 342.1052. *These data are consistent with literature values.*<sup>5</sup>

**3-[(5-Bromo-1H-indol-3-yl)thio]-2-phenylimidazo[1,2-a]pyridine (5ab):**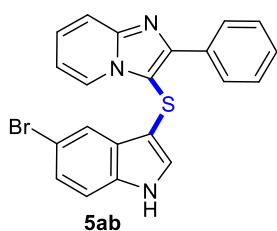

Following **GP3** using 1,2-bis(2-phenylimidazo[1,2-a]pyridin-3-yl)disulfane **2a** (225.3 mg, 0.5 mmol), 5-bromo-1H-indole **4b** (147.0 mg, 0.75 mmol) and diethyl phosphite (69.0 mg, 65  $\mu$ L, 0.5 mmol) for 15 h. Purified by flash column chromatography (silica gel, 40% EtOAc in petether) yielded title compound **5ab** as a light yellow solid (102.9 mg, 49%); **mp**: 227-229  $^{\circ}$ C [Lit.<sup>5</sup> 228-230 $^{\circ}$ C];  **$^1$ H NMR** (400 MHz, CDCl<sub>3</sub>)  $\delta$  8.59 (dt,  $J$  = 6.8, 1.0 Hz, 1H), 8.41 (s, 1H), 8.29–8.24 (m, 2H), 7.62 (d,  $J$  = 9.0 Hz, 1H), 7.56 (t,  $J$  = 7.4 Hz, 2H), 7.50–7.45 (m, 1H), 7.38 (d,  $J$  = 1.8 Hz, 1H), 7.21–7.17 (m, 2H), 7.11 (d,  $J$  = 8.6 Hz, 1H), 6.91 (td,  $J$  = 6.8, 1.1 Hz, 1H); **HRMS** (ESI-TOF) calculated for C<sub>21</sub>H<sub>15</sub>BrN<sub>3</sub>S [M+H]<sup>+</sup>:  $m/z$  420.0165; found 420.1053. These data are consistent with literature values.<sup>5</sup>

**3-[(6-Fluoro-1H-indol-3-yl)thio]-2-phenylimidazo[1,2-a]pyridine (5ac):**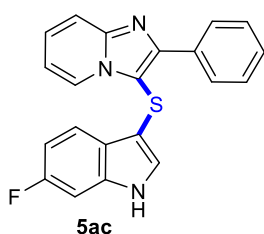

Following **GP3** using 1,2-bis(2-phenylimidazo[1,2-a]pyridin-3-yl)disulfane **2a** (225.3 mg, 0.5 mmol), 6-fluoro-1H-indole **4c** (101.3 mg, 0.75 mmol) and diethyl phosphite (69.0 mg, 0.5 mmol) for 15 h. Purified by flash column chromatography (silica gel, 40% EtOAc in petether) yielded title compound **5ac** as a light yellow solid (53.4 mg, 74%); **mp**: 206-208  $^{\circ}$ C;  **$^1$ H NMR** (400 MHz, DMSO-d<sub>6</sub>)  $\delta$  11.50 (s, 1H), 8.87 (d,  $J$  = 6.8 Hz, 1H), 8.33 (d,  $J$  = 7.2 Hz, 2H), 7.86 (d,  $J$  = 2.5 Hz, 1H), 7.64 (d,  $J$  = 9.0 Hz, 1H), 7.59 (t,  $J$  = 7.5 Hz, 2H), 7.49 (t,  $J$  = 7.4 Hz, 1H), 7.40–7.35 (m, 1H), 7.12–7.05 (m, 2H), 6.91 (dd,  $J$  = 8.7, 5.4 Hz, 1H), 6.64 (td,  $J$  = 9.7, 2.3 Hz, 1H);  **$^{13}$ C NMR** (101 MHz, DMSO-d<sub>6</sub>)  $\delta$  159.0 (d,  $J$  = 236.0 Hz), 147.9, 145.3, 136.1 (d,  $J$  = 12.8 Hz), 133.8, 131.0, 128.44(2C), 128.39(2C), 126.5, 125.0, 124.3, 119.2, 119.1, 117.0, 113.1, 109.8, 108.3 (d,  $J$  = 24.6 Hz), 101.0, 98.2 (d,  $J$  = 25.8 Hz); **HRMS** (ESI-TOF) calculated for C<sub>21</sub>H<sub>15</sub>N<sub>3</sub>SF [M+H]<sup>+</sup>:  $m/z$  360.0965; found 360.0965.

**3-[(5-Methoxy-1H-indol-3-yl)thio]-2-phenylimidazo[1,2-a]pyridine (5ad):**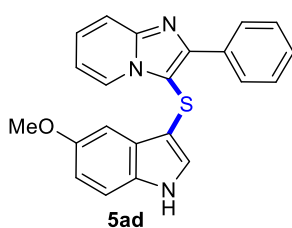

Following **GP3** using 1,2-bis(2-phenylimidazo[1,2-a]pyridin-3-yl)disulfane **2a** (225.3 mg, 0.5 mmol), 5-methoxy-1H-indole **4d** (110.3 mg, 0.75 mmol) and diethyl phosphite (69.0 mg, 65  $\mu$ L, 0.5 mmol) for 15 h. Purified by flash column chromatography (silica gel, 40% EtOAc in petether) yielded title compound **5ad** as a light yellow solid (131.9 mg, 71%); **mp**: 186-188 $^{\circ}$ C;  **$^1$ H NMR** (400 MHz, DMSO-d<sub>6</sub>)  $\delta$  11.31 (s, 1H), 8.94 (d,  $J$  = 6.3 Hz, 1H), 8.46 (d,  $J$  = 7.2 Hz, 2H), 7.93 (s, 1H), 7.61 (d,  $J$  = 8.4 Hz, 2H), 7.50–7.33 (m, 3H), 7.18 (d,  $J$  = 8.6 Hz, 1H), 7.10–7.05 (m, 1H), 6.59 (d,  $J$  = 8.1 Hz, 1H), 6.44 (s, 1H), 3.15 (s, 3H);  **$^{13}$ C NMR** (101 MHz, DMSO-d<sub>6</sub>)  $\delta$  153.9, 147.5, 145.3, 134.0, 131.0, 129.0, 128.6, 128.44(2C), 128.39(2C), 128.32, 128.2, 126.4, 125.1, 117.0, 113.0, 112.7, 110.1, 99.9, 99.1, 54.4; **HRMS** (ESI-TOF) calculated for C<sub>22</sub>H<sub>18</sub>N<sub>3</sub>SO [M+H]<sup>+</sup>:  $m/z$  372.1171; found 372.1165.

**3-[(1*H*-Indol-3-yl)thio]-2-(*p*-tolyl)imidazo[1,2-*a*]pyridine (5ba):**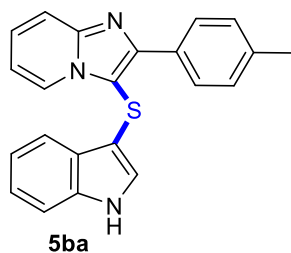

Following **GP3** using 1,2-bis(2-(*p*-tolyl)imidazo[1,2-*a*]pyridin-3-yl)disulfane **2b** (239.3 mg, 0.5 mmol), 1*H*-indole **4a** (87.8 mg, 0.75 mmol) and diethyl phosphite (69.0 mg, 65  $\mu$ L, 0.5 mmol) for 15 h. Purified by flash column chromatography (silica gel, 40% EtOAc in petether) yielded title compound **5ba** as a yellow solid (142.1 mg, 80%); **mp**: 190-192  $^{\circ}$ C;  **$^1$ H NMR** (400 MHz, DMSO- $d_6$ )  $\delta$  11.44 (s, 1H), 8.86 (d,  $J$  = 6.6 Hz, 1H), 8.30 (d,  $J$  = 7.7 Hz, 2H), 7.85 (s, 1H), 7.61 (d,  $J$  = 8.8 Hz, 1H), 7.41–7.31 (m, 4H), 7.07–6.99 (m, 3H), 6.79 (t,  $J$  = 7.3 Hz, 1H), 2.42 (s, 3H);  **$^{13}$ C NMR** (101 MHz, DMSO- $d_6$ )  $\delta$  147.8, 145.2, 137.7, 136.2, 131.1, 130.2, 129.0(2C), 128.3(2C), 127.7, 126.3, 124.9, 121.9, 119.7, 118.2, 116.9, 112.9, 112.1, 109.7, 100.6, 21.0; **HRMS** (ESI-TOF) calculated for C<sub>22</sub>H<sub>18</sub>N<sub>3</sub>S [M+H]<sup>+</sup>:  $m/z$  356.1216; found 356.1222.

**3-[(5-Bromo-1*H*-indol-3-yl)thio]-2-(*p*-tolyl)imidazo[1,2-*a*]pyridine (5bb):**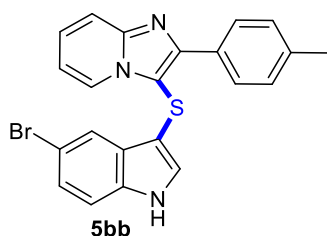

Following **GP3** using 1,2-bis(2-(*p*-tolyl)imidazo[1,2-*a*]pyridin-3-yl)disulfane **2b** (239.3 mg, 0.5 mmol), 5-bromo-1*H*-indole **4b** (147.0 mg, 0.75 mmol) and diethyl phosphite (69 mg, 65  $\mu$ L, 0.5 mmol) for 15 h. Purified by flash column chromatography (silica gel, 40% EtOAc in petether) yielded title compound **5bb** as a light yellow solid (175.9 mg, 81%); **mp**: 210-212 $^{\circ}$ C;  **$^1$ H NMR** (400 MHz, DMSO- $d_6$ )  $\delta$  11.59 (s, 1H), 8.88 (d,  $J$  = 5.9 Hz, 1H), 8.14 (d,  $J$  = 7.3 Hz, 2H), 7.93 (s, 1H), 7.62 (d,  $J$  = 8.4 Hz, 1H), 7.43–7.35 (m, 3H), 7.25 (d,  $J$  = 8.4 Hz, 1H), 7.12–7.05 (m, 2H), 6.94 (s, 1H), 2.44 (s, 3H);  **$^{13}$ C NMR** (101 MHz, DMSO- $d_6$ )  $\delta$  148.7, 145.3, 137.8, 134.8, 131.8, 130.9, 129.5, 129.0 (2C), 128.5 (2C), 126.4, 124.9, 124.5, 120.9, 116.9, 114.0, 113.0, 112.5, 109.6, 100.7, 21.0; **HRMS** (ESI-TOF) calculated for C<sub>22</sub>H<sub>17</sub>BrN<sub>3</sub>S [M+H]<sup>+</sup>:  $m/z$  434.0321; found 434.0321.

**3-[(6-Fluoro-1*H*-indol-3-yl)thio]-2-(*p*-tolyl)imidazo[1,2-*a*]pyridine (5bc):**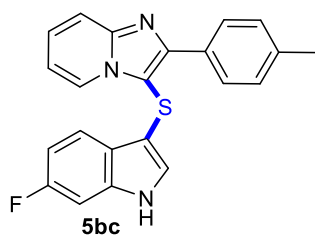

Following **GP3** using 1,2-bis(2-(*p*-tolyl)imidazo[1,2-*a*]pyridin-3-yl)disulfane **2b** (239.3 mg, 0.5 mmol), 6-fluoro-1*H*-indole **4c** (141.9 mg, 0.75 mmol) and diethyl phosphite (69.0 mg, 65  $\mu$ L, 0.5 mmol) for 15 h. Purified by flash column chromatography (silica gel, 40% EtOAc in petether) yielded title compound **5bc** as a light yellow solid (141.9 mg, 76%); **mp**: 198-200 $^{\circ}$ C;  **$^1$ H NMR** (400 MHz, CDCl<sub>3</sub>)  $\delta$  8.55 (dt,  $J$  = 6.8, 1.2 Hz, 1H), 8.22 (d,  $J$  = 8.2 Hz, 2H), 7.59 (d,  $J$  = 9.0 Hz, 1H), 7.33 (d,  $J$  = 7.9 Hz, 2H), 7.24–7.19 (m, 2H), 7.17 (d,  $J$  = 2.6 Hz, 1H), 6.92 (dd,  $J$  = 9.3, 2.2 Hz, 1H), 6.86 (td,  $J$  = 6.8, 1.1 Hz, 1H), 6.76–6.71 (m, 1H), 2.45 (s, 3H);  **$^{13}$ C NMR** (101 MHz, DMSO- $d_6$ )  $\delta$  159.0 (d,  $J$  = 240.9 Hz), 147.9, 145.3, 137.7, 136.1 (d,  $J$  = 12.8 Hz), 130.9 (d,  $J$  = 15.5 Hz), 129.0(2C), 128.3(2C), 126.3, 124.9, 124.4, 119.2 (d,  $J$  = 10.3 Hz), 116.9, 113.0, 109.3, 108.3 (d,  $J$  = 24.7 Hz), 101.1, 98.2 (d,  $J$  = 25.8 Hz), 20.9 (one quaternary aromatic resonance could not be identified); **HRMS** (ESI-TOF) calculated for C<sub>22</sub>H<sub>17</sub>FN<sub>3</sub>S [M+H]<sup>+</sup>:  $m/z$  374.1122; found 374.1121.

**3-[(5-Methoxy-1H-indol-3-yl)thio]-2-(p-tolyl)imidazo[1,2-a]pyridine (5bd):**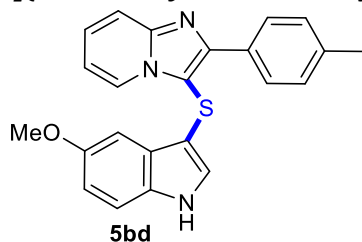

Following **GP3** using 1,2-bis(2-(p-tolyl)imidazo[1,2-a]pyridin-3-yl)disulfane **2b** (239.3 mg, 0.5 mmol), 5-methoxy-1H-indole **4d** (110.3 mg, 0.75 mmol) and diethyl phosphite (69.0 mg, 65  $\mu$ L, 0.5 mmol) for 15 h. Purified by flash column chromatography (silica gel, 40% EtOAc in petether) yielded title compound **5bd** as a light yellow solid (165.7 mg, 86%); **mp**: 166-168°C; **<sup>1</sup>H NMR** (400 MHz, 4:1 DMSO- $d_6$ :DCM#)  $\delta$  11.32 (s, 1H), 8.93 (d,  $J$  = 6.8 Hz, 1H), 8.37 (d,  $J$  = 8.1 Hz, 2H), 7.92 (d,  $J$  = 2.6 Hz, 1H), 7.61 (d,  $J$  = 9.0 Hz, 1H), 7.40 (d,  $J$  = 8.0 Hz, 2H), 7.37–7.32 (m, 1H), 7.19 (d,  $J$  = 8.7 Hz, 1H), 7.05 (td,  $J$  = 6.8, 0.8 Hz, 1H), 6.61 (dd,  $J$  = 8.7, 2.4 Hz, 1H), 6.48 (d,  $J$  = 2.2 Hz, 1H), 3.18 (s, 3H), 2.38 (s, 3H); **<sup>13</sup>C NMR** (101 MHz, 4:1 DMSO- $d_6$ :DCM#)  $\delta$  153.9, 147.7, 145.2, 137.7, 131.2, 131.0, 130.9, 128.9(2C), 128.4(3C), 126.3, 125.0, 116.9, 112.9, 112.8, 112.7, 109.8, 100.2, 99.2, 54.2, 20.8; **HRMS** (ESI-TOF) calculated for C<sub>23</sub>H<sub>20</sub>N<sub>3</sub>OS [M+H]<sup>+</sup>:  $m/z$  386.1322; found 386.1321. #A mixture of DCM:DMSO- $d_6$  (4:1) used for the clear solubility and recorded the NMR for better resolution of the spectra.

**Table S1: Crystal data and structure refinement for 2i and 3a**

| DATA_2i                                                       |                   | CCDC               |                                 | 2128914            |
|---------------------------------------------------------------|-------------------|--------------------|---------------------------------|--------------------|
| Bond precision:                                               |                   | C-C = 0.0090 Å     |                                 | Wavelength=0.71073 |
| Cell:                                                         | a=12.800(2)       | b=13.044(2)        | c=28.611(5)                     |                    |
|                                                               | alpha=90          | beta=90            | gamma=90                        |                    |
| Temperature:                                                  | 100 K             |                    |                                 |                    |
|                                                               | <b>Calculated</b> | <b>Reported</b>    |                                 |                    |
| Volume                                                        | 4777.0(13)        | 4776.8(13)         |                                 |                    |
| Space group                                                   | P 21 21 21        | P 21 21 21         |                                 |                    |
| Hall group                                                    | P 2ac 2ab         | P 2ac 2ab          |                                 |                    |
| Moiety formula                                                | C28 H22 N4 S2     | C28 H22 N4 S2      |                                 |                    |
| Sum formula                                                   | C28 H22 N4 S2     | C28 H22 N4 S2      |                                 |                    |
| Mr                                                            | 478.62            | 478.61             |                                 |                    |
| Dx,g cm-3                                                     | 1.331             | 1.331              |                                 |                    |
| Z                                                             | 8                 | 8                  |                                 |                    |
| Mu (mm-1)                                                     | 0.248             | 0.248              |                                 |                    |
| F000                                                          | 2000.0            | 2000.0             |                                 |                    |
| F000'                                                         | 2002.57           |                    |                                 |                    |
| h,k,lmax                                                      | 15,15,34          | 15,15,34           |                                 |                    |
| Nref                                                          | 8422[ 4698]       | 8420               |                                 |                    |
| Tmin,Tmax                                                     | 0.971,0.980       | 0.619,0.746        |                                 |                    |
| Tmin'                                                         | 0.959             |                    |                                 |                    |
| Correction method= # Reported T Limits: Tmin=0.619 Tmax=0.746 |                   |                    |                                 |                    |
| AbsCorr = MULTI-SCAN                                          |                   |                    |                                 |                    |
| Data completeness= 1.79/1.00                                  |                   | Theta(max)= 24.999 |                                 |                    |
| R(reflections)= 0.0559( 8354)                                 |                   |                    | wR2(reflections)= 0.1503( 8420) |                    |
| S = 1.263                                                     | Npar= 600         |                    |                                 |                    |

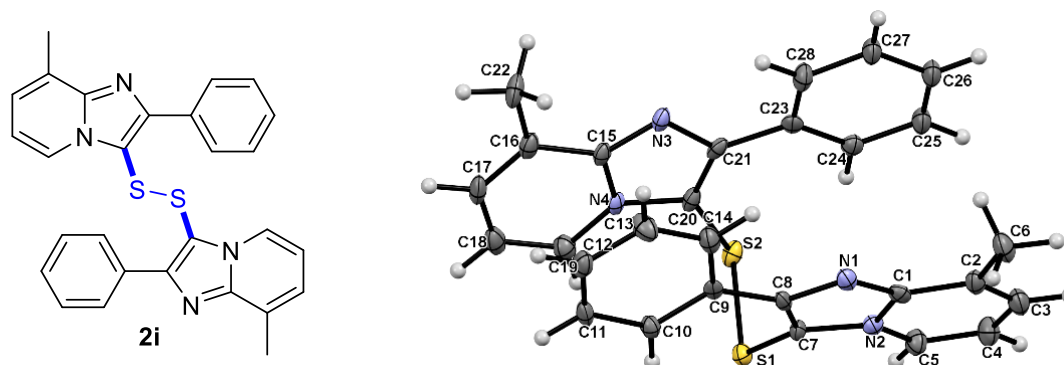

**Figure S1:** ORTEP diagram of compound **2i**, the asymmetric unit contains two molecules for clarity one of the molecules was deleted. Herein, the ellipsoids are drawn with a 50% probability level. [Crystallization was performed by taking 30 mg of **2i** in a conical flask followed by slow addition of 20% EtOAc in petroleum ether until dissolving the compound **2i**. The obtained clear solution was kept at ambient temperature to evaporate petroleum ether and formed single-crystals as desired.]

| DATA_3a                                                       |                                                  | CCDC               |                                                  | 2128915            |
|---------------------------------------------------------------|--------------------------------------------------|--------------------|--------------------------------------------------|--------------------|
| Bond precision:                                               |                                                  | C-C = 0.0020 Å     |                                                  | Wavelength=0.71073 |
| Cell:                                                         | a=11.9878(11)                                    | b=13.8358(16)      | c=12.5210(14)                                    |                    |
|                                                               | alpha=90                                         | beta=101.924(4)    | gamma=90                                         |                    |
| Temperature:                                                  | 100 K                                            |                    |                                                  |                    |
|                                                               | Calculated                                       |                    | Reported                                         |                    |
| Volume                                                        | 2031.9(4)                                        |                    | 2031.9(4)                                        |                    |
| Space group                                                   | P 21/n                                           |                    | P 21/n                                           |                    |
| Hall group                                                    | -P 2yn                                           |                    | -P 2yn                                           |                    |
| Moiety formula                                                | C <sub>26</sub> H <sub>18</sub> N <sub>4</sub> S |                    | C <sub>26</sub> H <sub>18</sub> N <sub>4</sub> S |                    |
| Sum formula                                                   | C <sub>26</sub> H <sub>18</sub> N <sub>4</sub> S |                    | C <sub>26</sub> H <sub>18</sub> N <sub>4</sub> S |                    |
| Mr                                                            | 418.50                                           |                    | 418.50                                           |                    |
| Dx,g cm <sup>-3</sup>                                         | 1.368                                            |                    | 1.368                                            |                    |
| Z                                                             | 4                                                |                    | 4                                                |                    |
| Mu (mm <sup>-1</sup> )                                        | 0.181                                            |                    | 0.181                                            |                    |
| F000                                                          | 872.0                                            |                    | 872.0                                            |                    |
| F000'                                                         | 872.77                                           |                    |                                                  |                    |
| h,k,lmax                                                      | 15,17,15                                         |                    | 15,17,15                                         |                    |
| Nref                                                          | 4436                                             |                    | 4429                                             |                    |
| Tmin,Tmax                                                     | 0.979,0.986                                      |                    | 0.696,0.746                                      |                    |
| Tmin'                                                         | 0.966                                            |                    |                                                  |                    |
| Correction method= # Reported T Limits: Tmin=0.696 Tmax=0.746 |                                                  |                    |                                                  |                    |
| AbsCorr = MULTI-SCAN                                          |                                                  |                    |                                                  |                    |
| Data completeness= 0.998                                      |                                                  | Theta(max)= 27.000 |                                                  |                    |
| R(reflections)= 0.0409( 4142)                                 |                                                  |                    | wR2(reflections)= 0.1206( 4429)                  |                    |
| S = 1.202                                                     |                                                  | Npar= 281          |                                                  |                    |

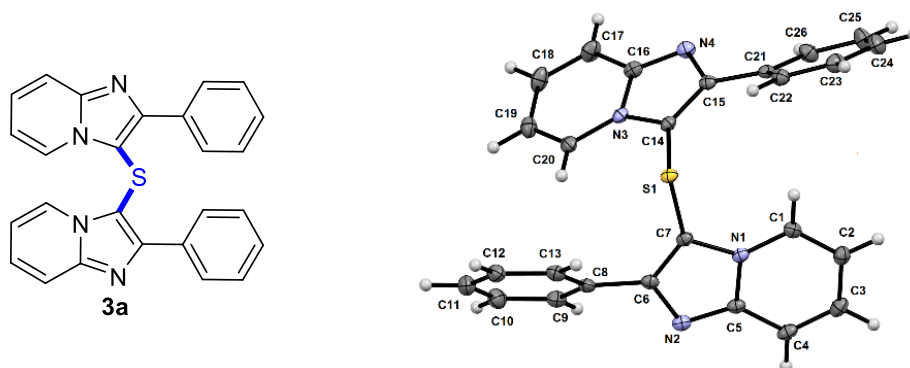

**Figure S2:** ORTEP diagram of **3a** drawn at the 50% probability level.

[Crystallization was performed by taking 30 mg of **3a** in a conical flask followed by slow addition of 20% EtOAc in petroleum ether until dissolving the compound **3a**. The obtained clear solution was kept at ambient temperature to evaporate petroleum ether and formed single-crystals as desired.]

## References

1. M. H. Fisher and A. Lusi, *J. Med. Chem.*, 1972, **15**, 982.
2. D. Kour, R. Khajuria and K. K. Kapoor, *Tetrahedron Lett.*, 2016, **57**, 4464.
3. S. M. A. Shakoor, D. S. Agarwal, S. Khullar, S. K. Mandal and R. Sakhuja, *Chem.-Asian J.*, 2017, **12**, 3061.
4. L.-L. Tian, S. Lu, Z.-H. Zhang, E.-L. Huang, H.-T. Yan, X. Zhu, X.-Q. Hao and M.-P. Song, *J. Org. Chem.*, 2019, **84**, 5213.
5. T. Guo, X.-N. Wei, M. Zhang, Y. Liu, L.-M. Zhu and Y.-H. Zhao, *Chem. Commun.*, 2020, **56**, 5751.

---

## Unknown Compounds Spectra $^1\text{H}$ and $^{13}\text{C}$ NMR Spectra

---

(Note: Common laboratory solvents as trace impurities, peaks at  $\delta$  1.25 and  $\delta$  1.58 refers to grease and moisture respectively in a  $^1\text{H}$  NMR recorded in  $\text{CDCl}_3$  and DMSO. In a  $^{13}\text{C}$  NMR recorded in  $\text{CDCl}_3$  a peak at  $\delta$  29.7 represents to grease; Ref. H. E. Gottlie, V. Kotlyar, A. Nudelman, *J. Org. Chem.*, 1997, 62, 7512).

---



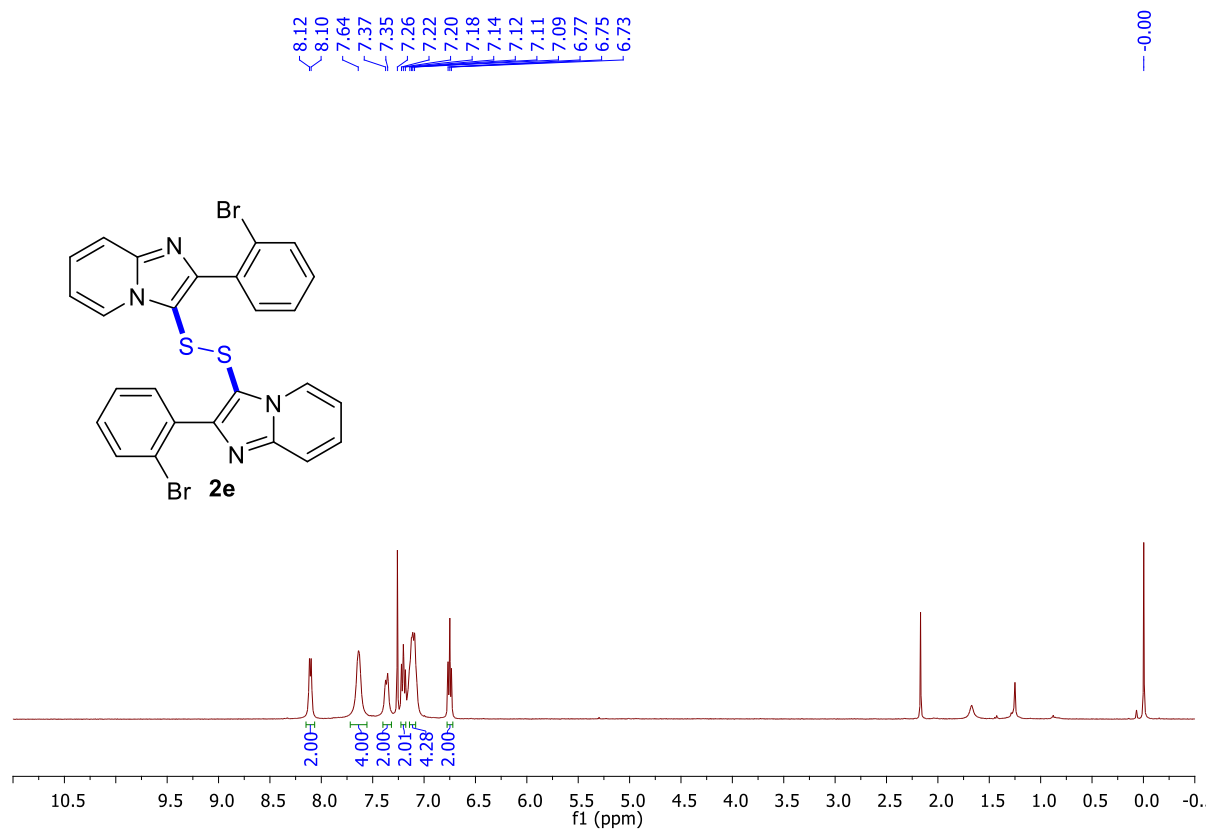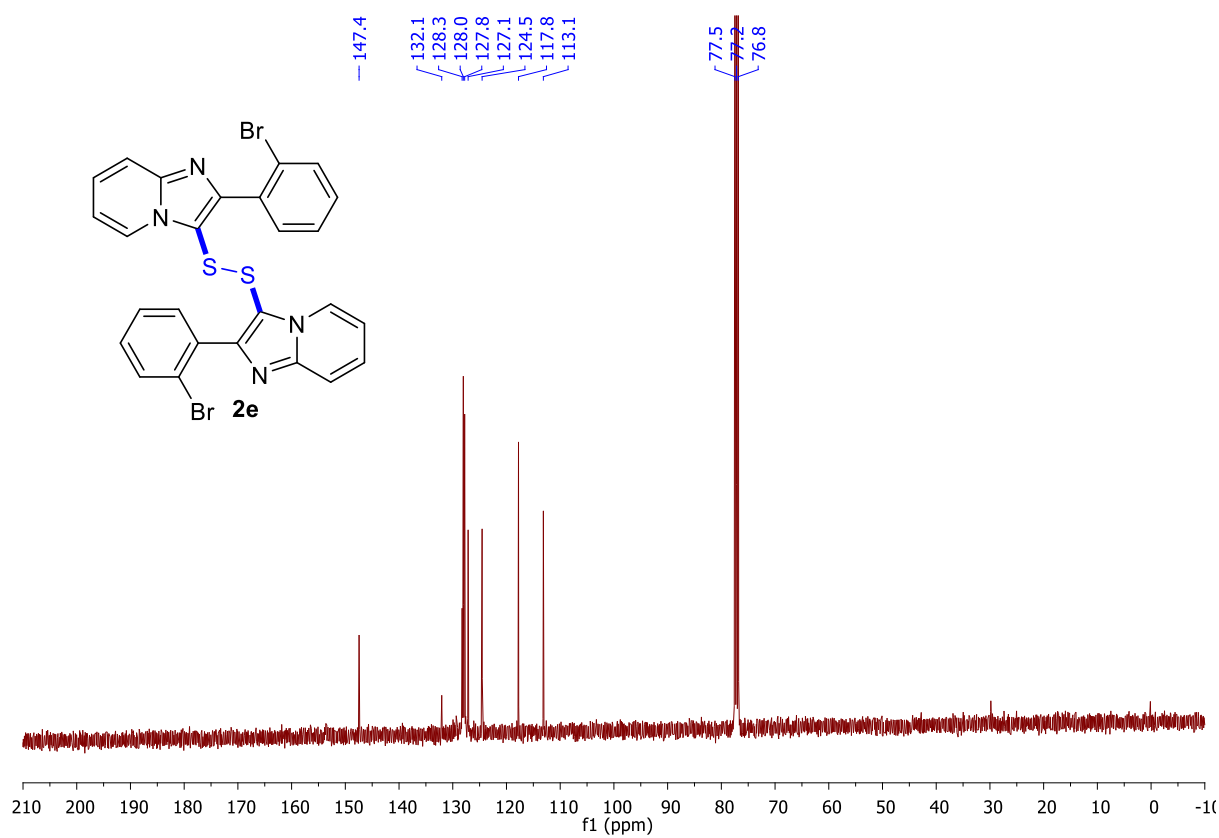

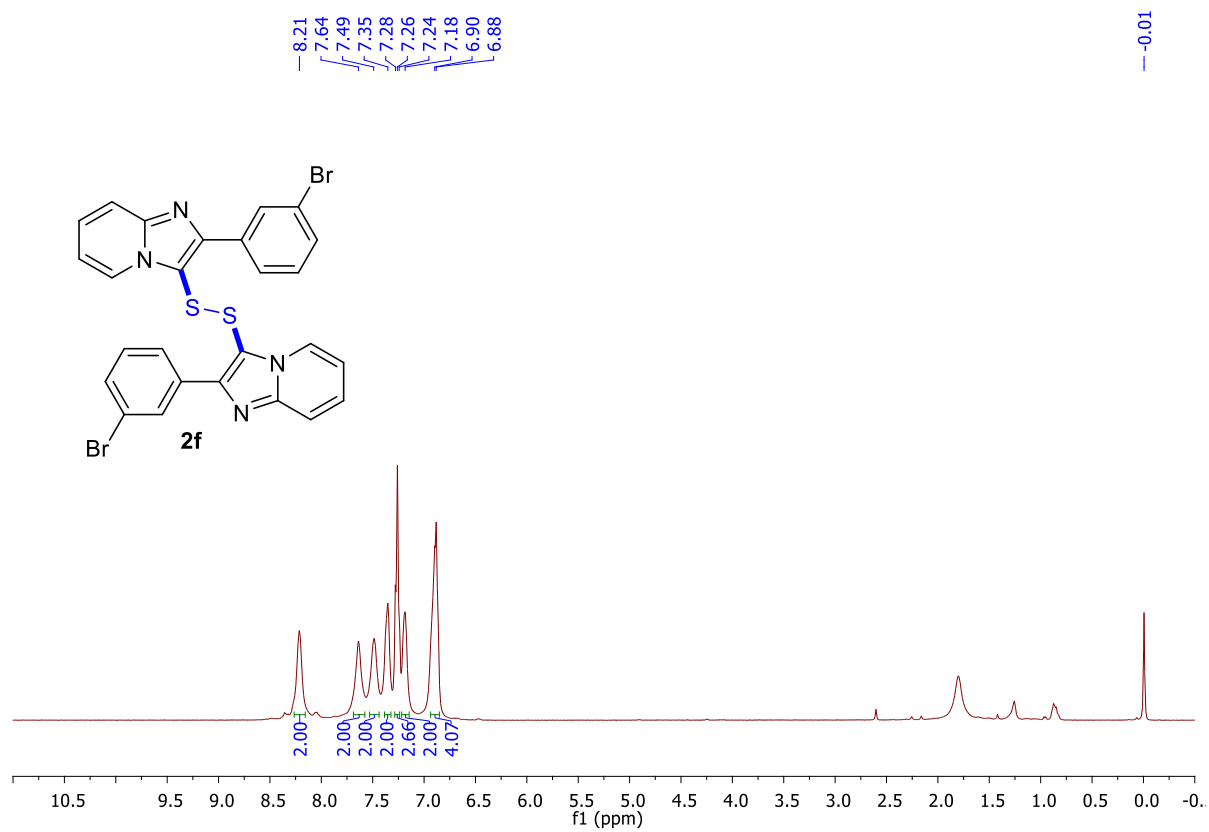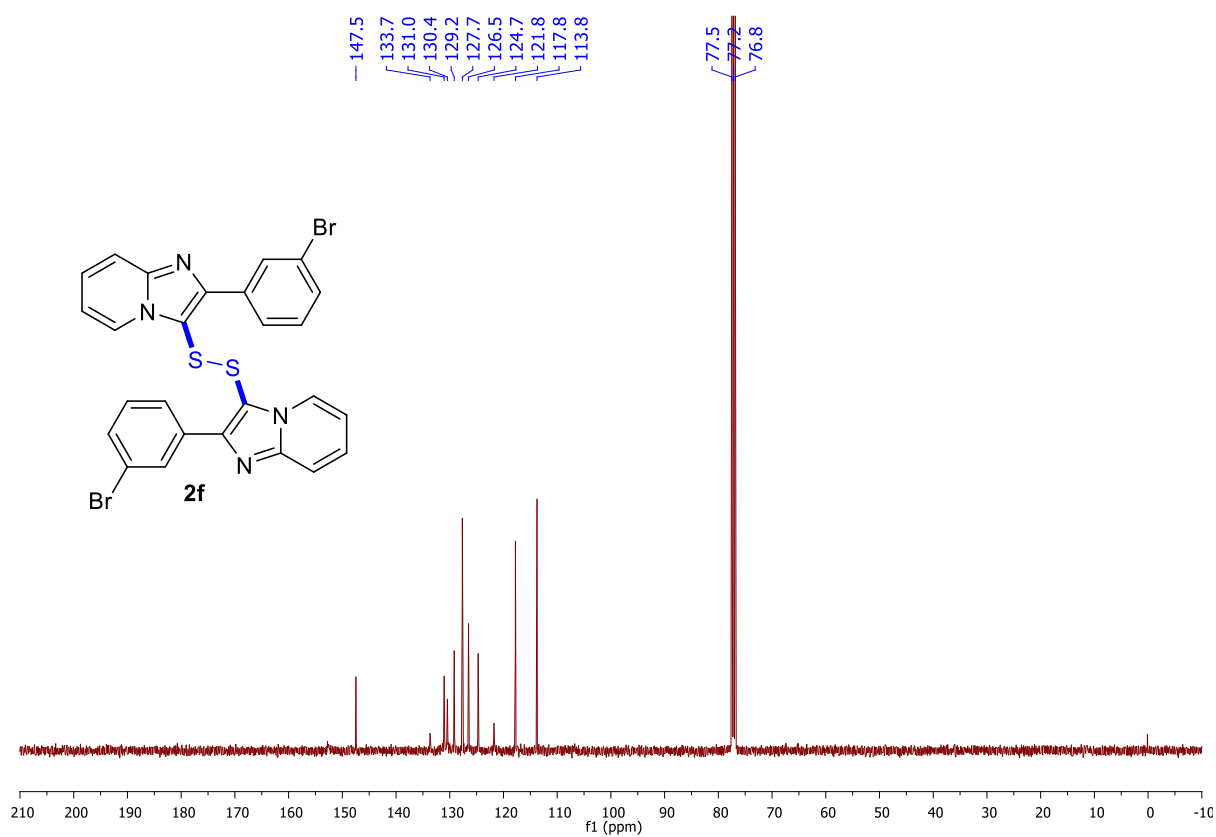

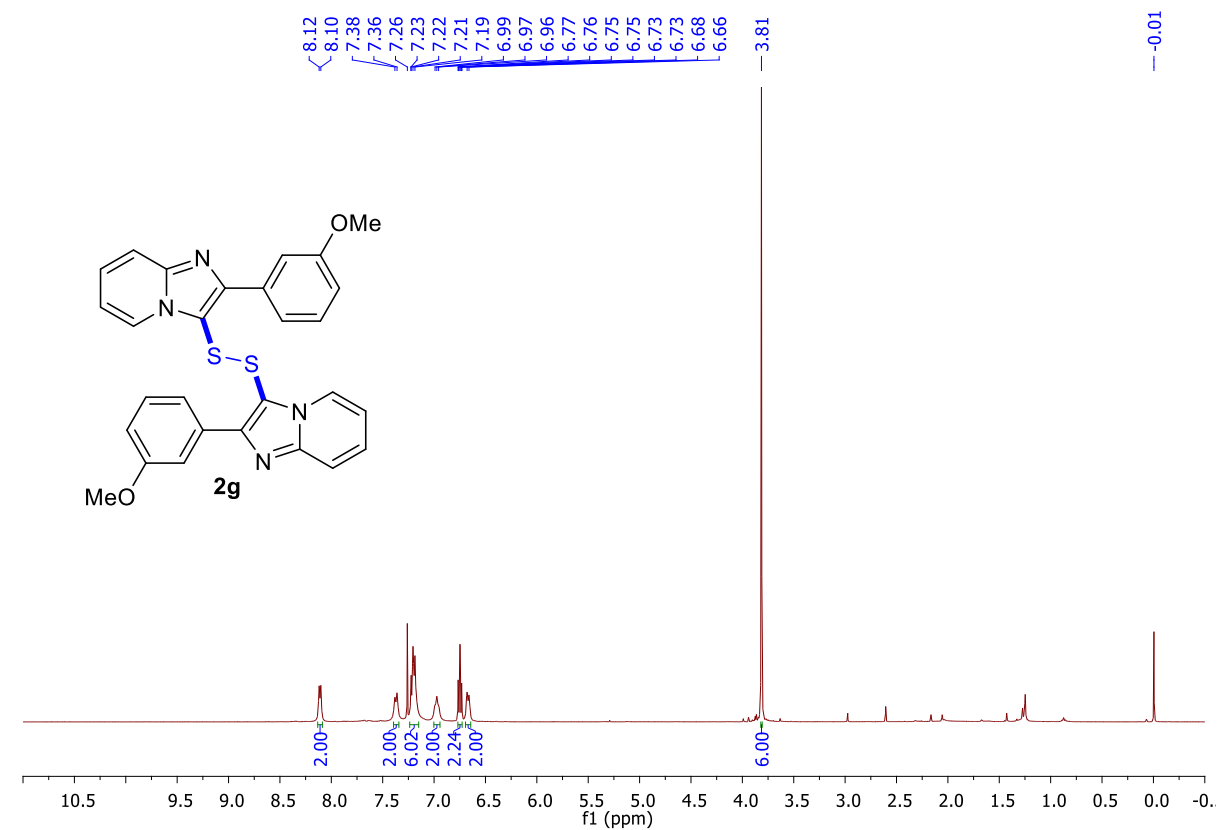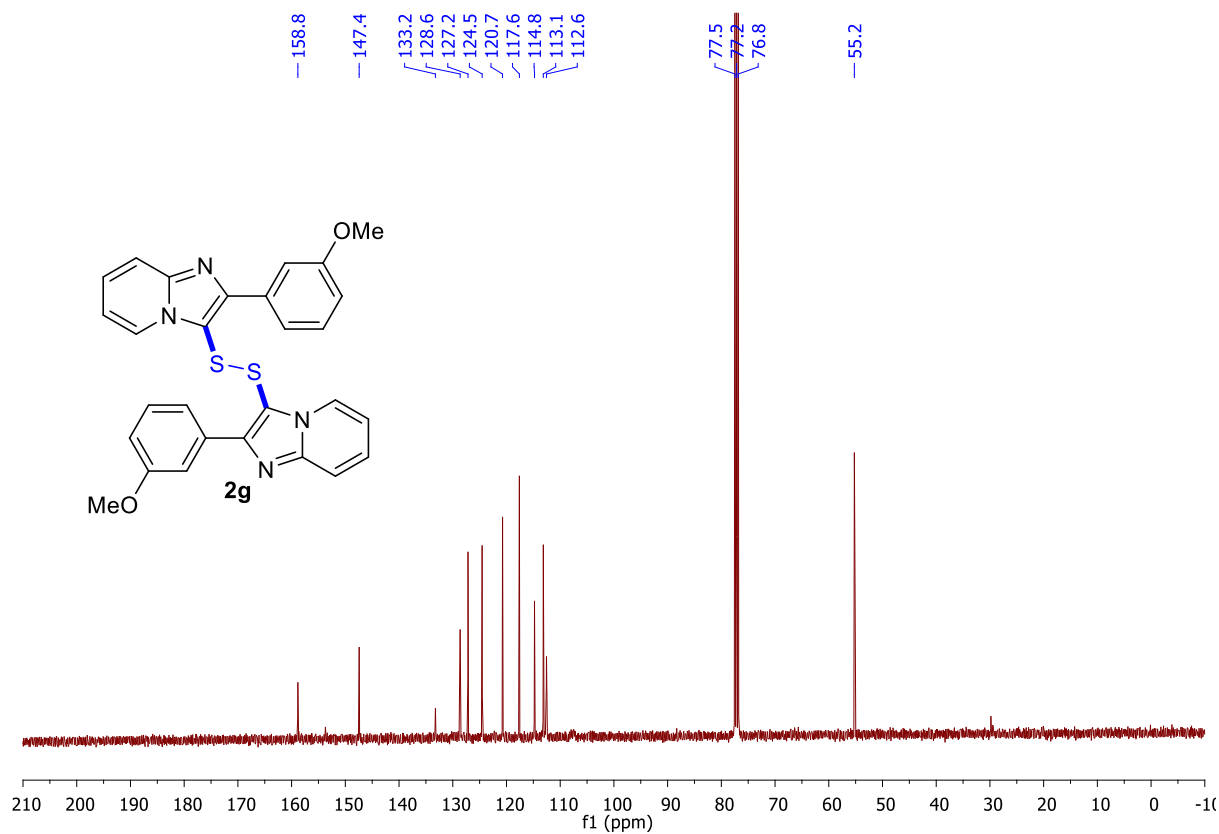

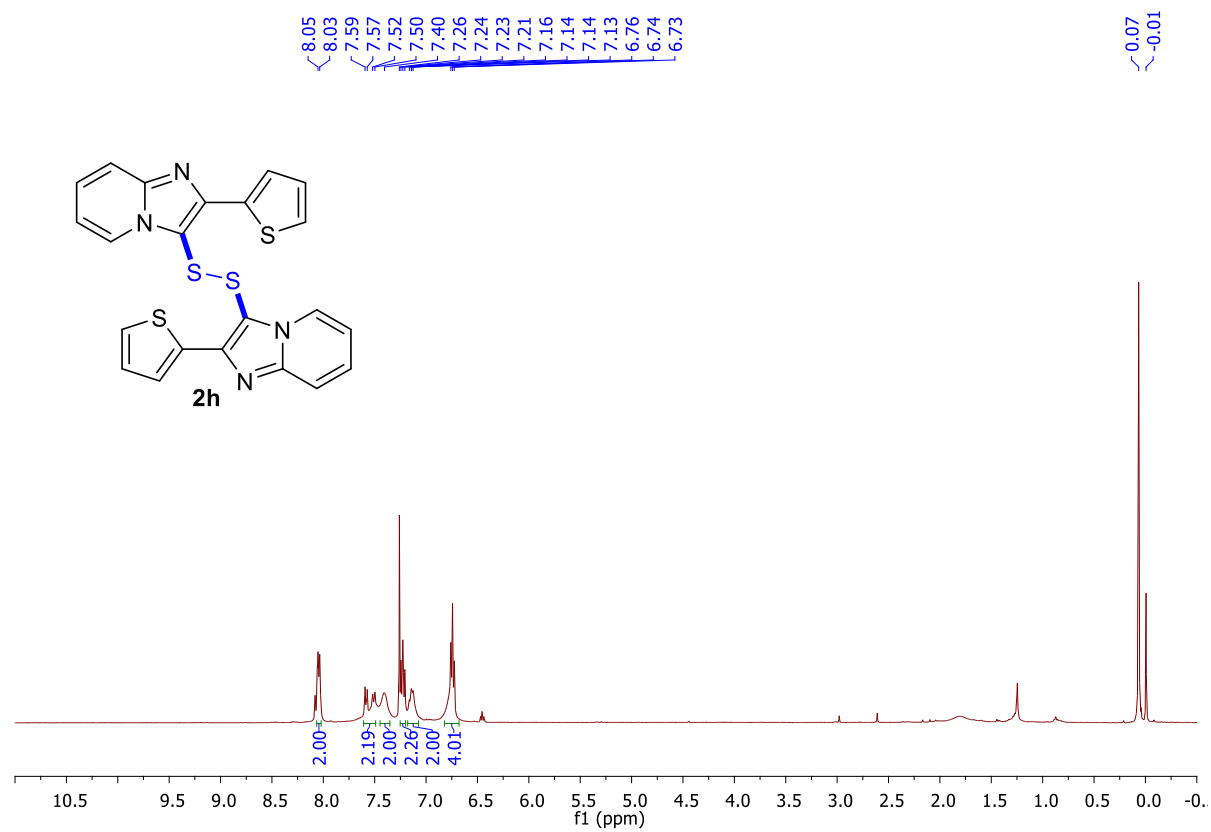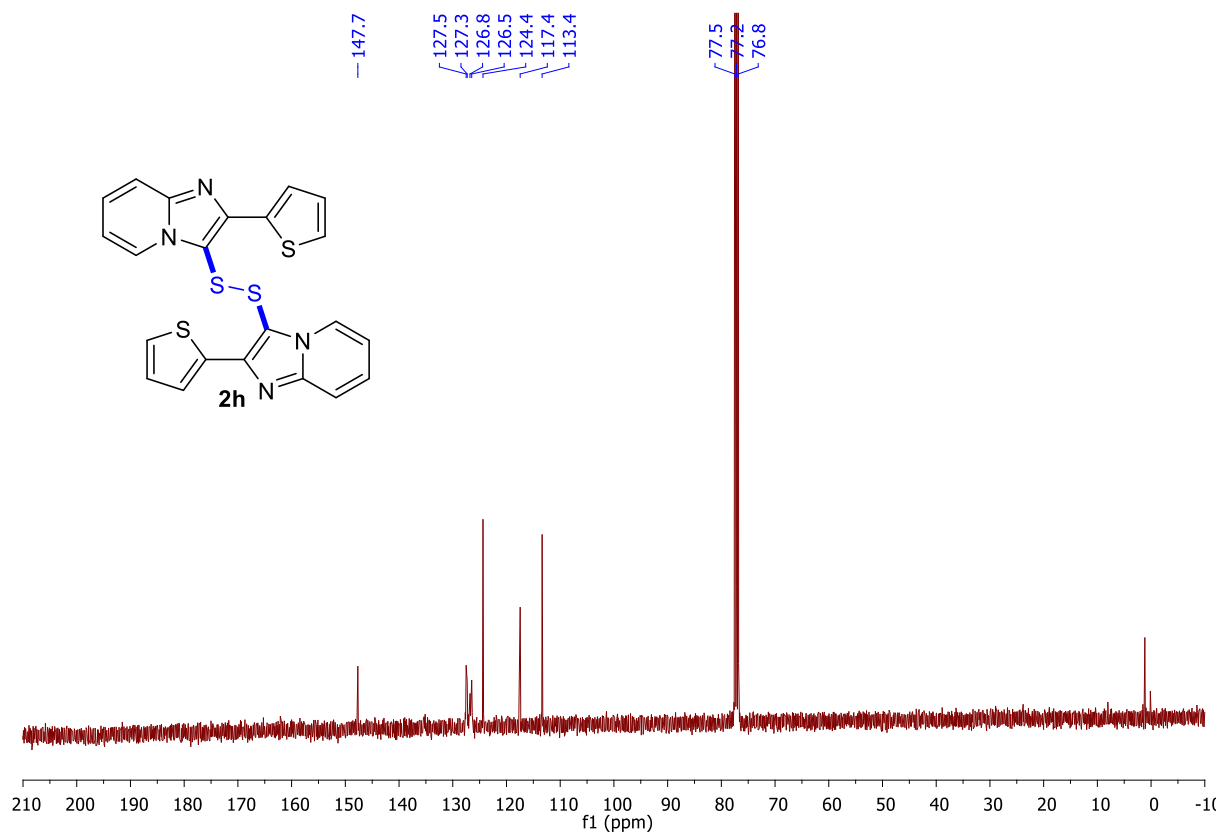

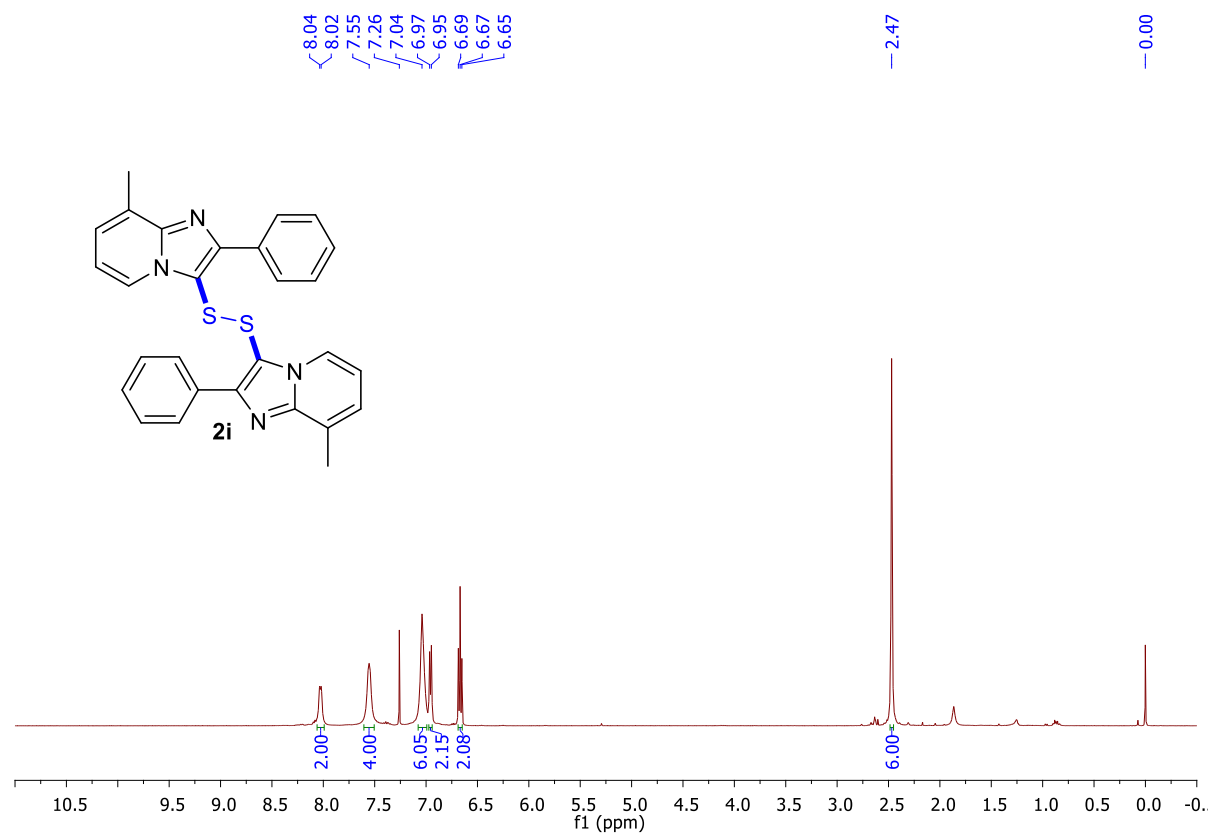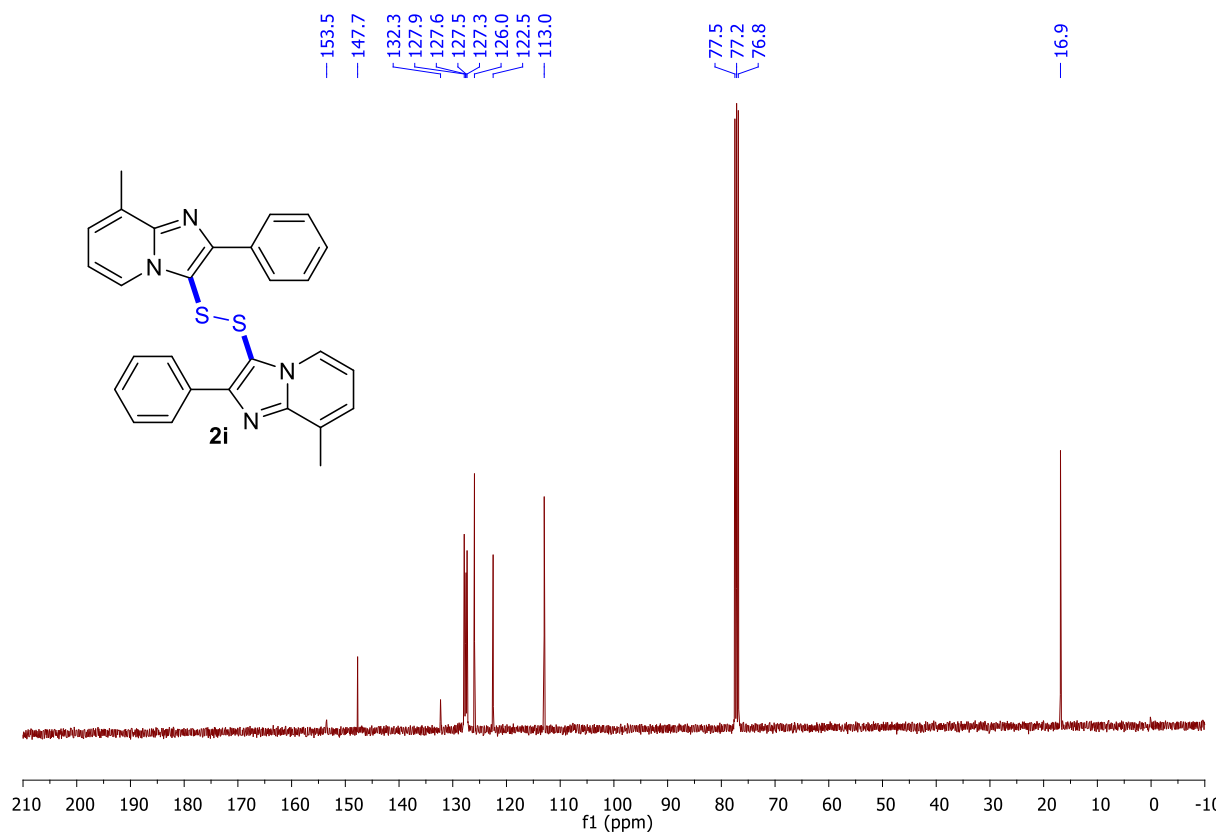

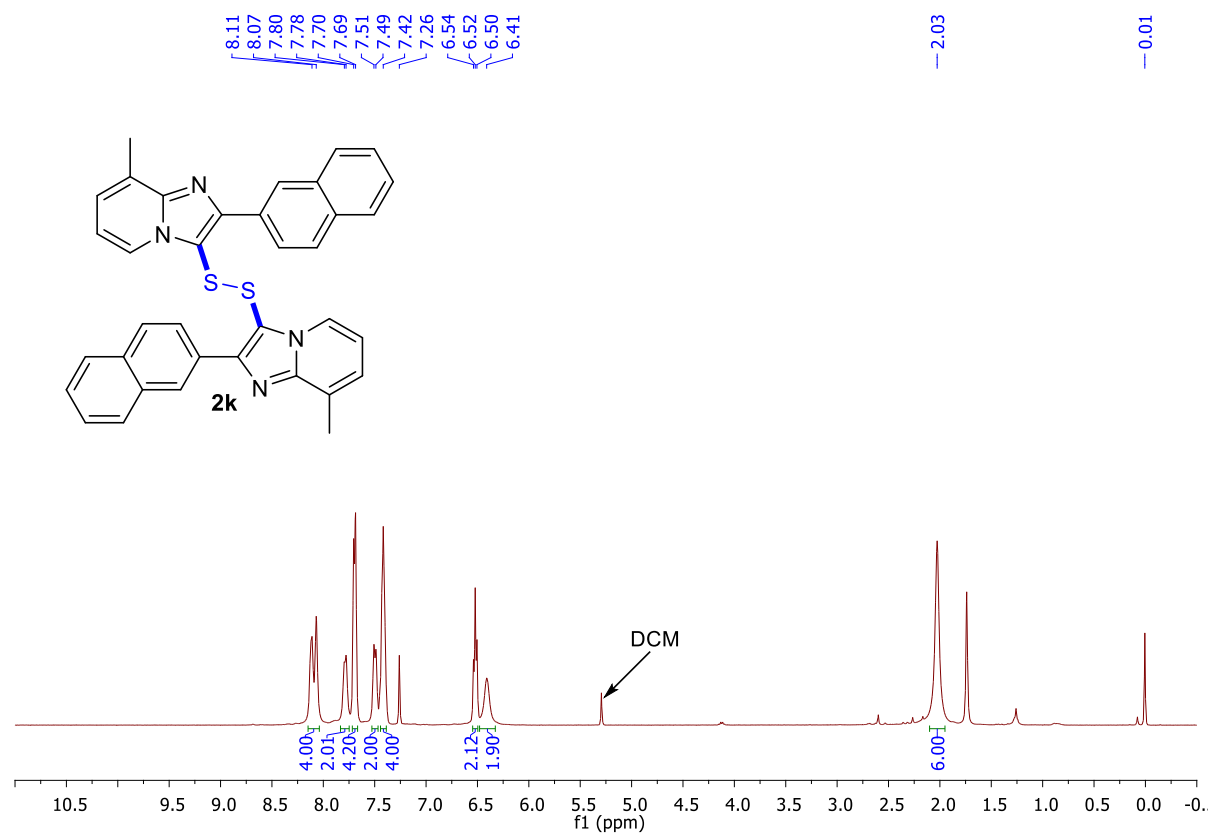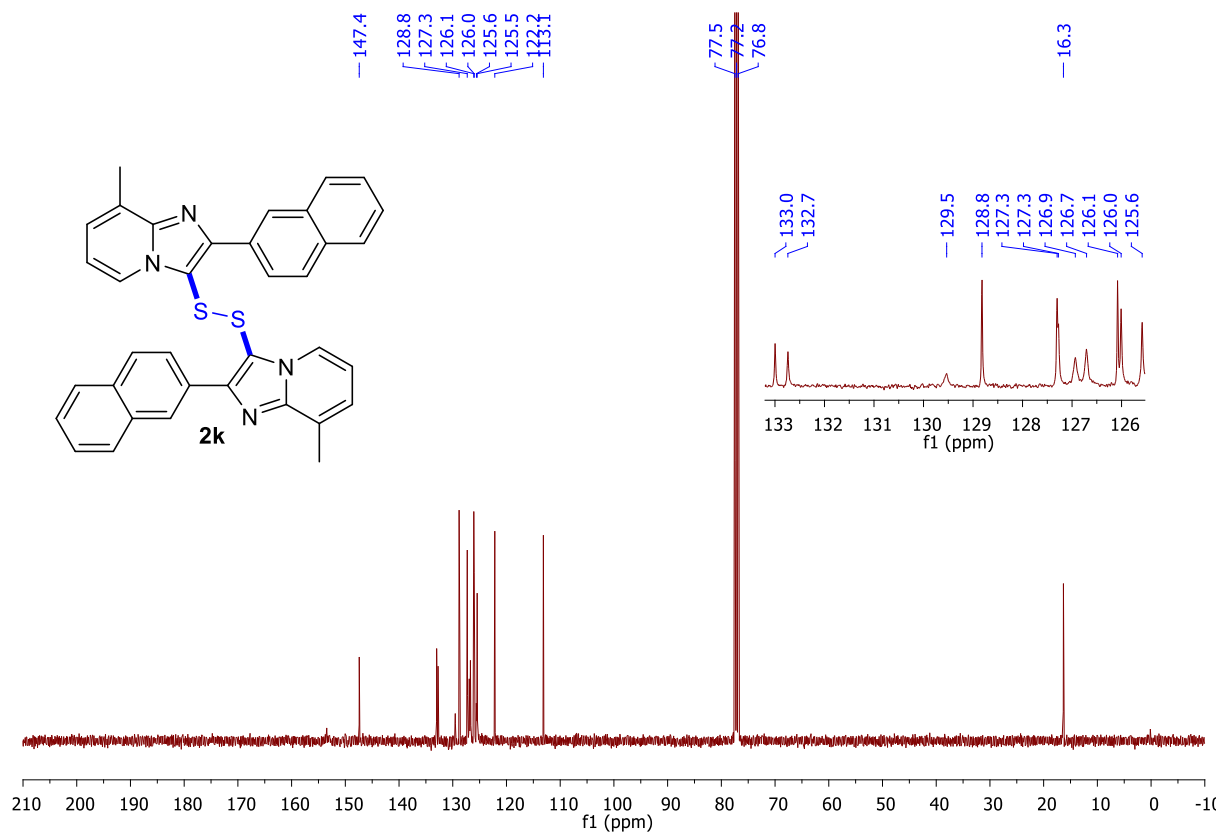



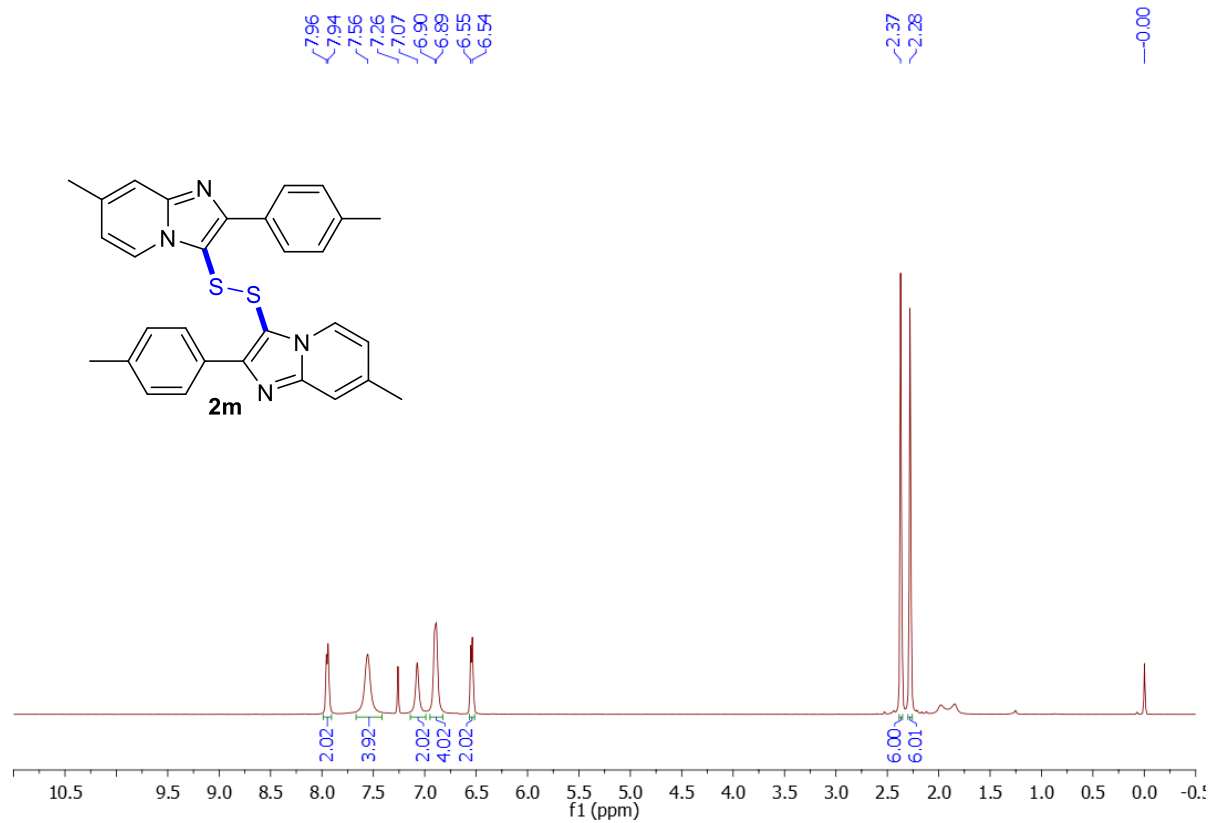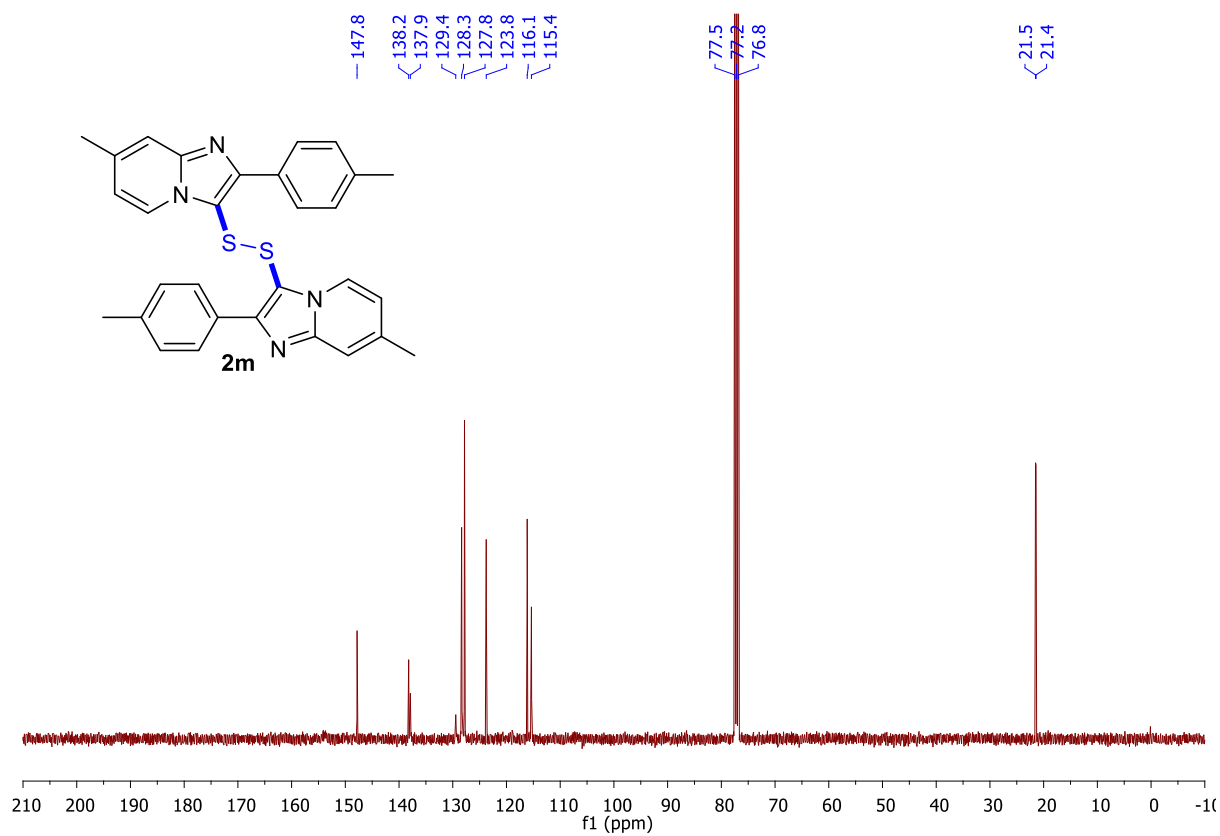

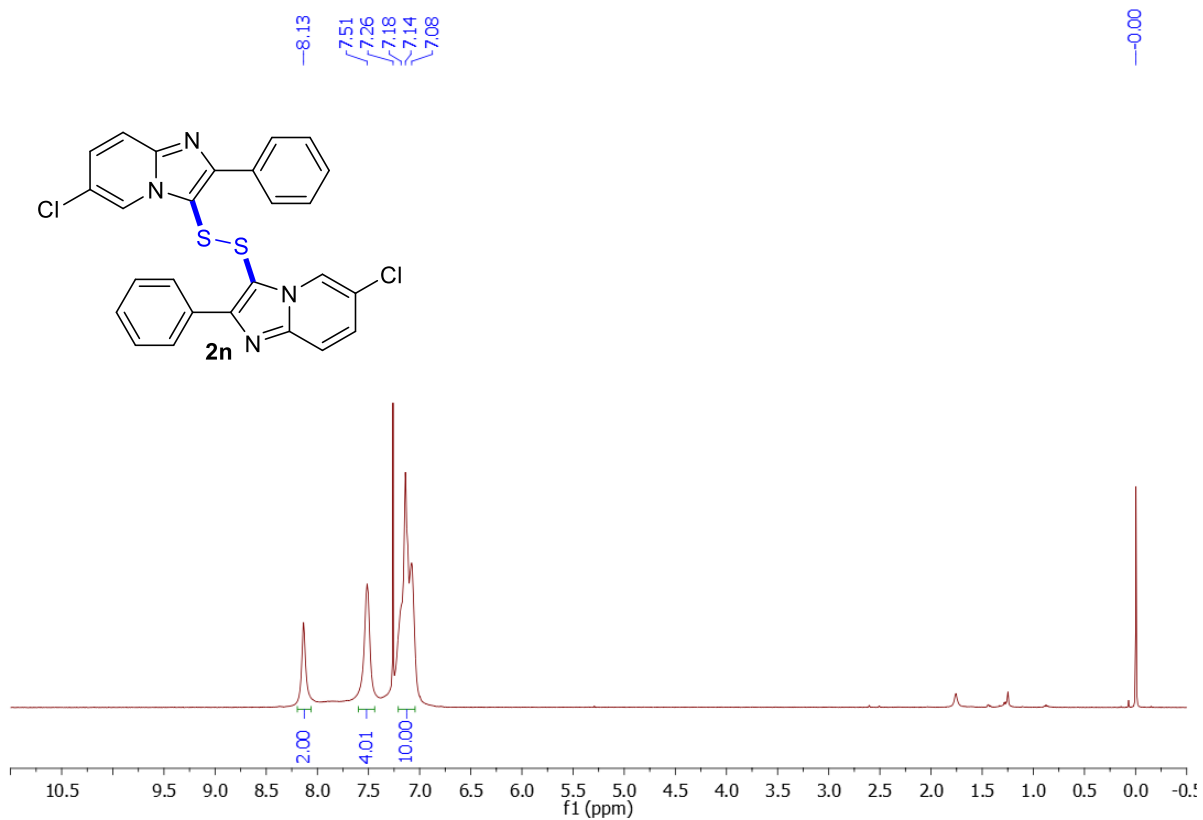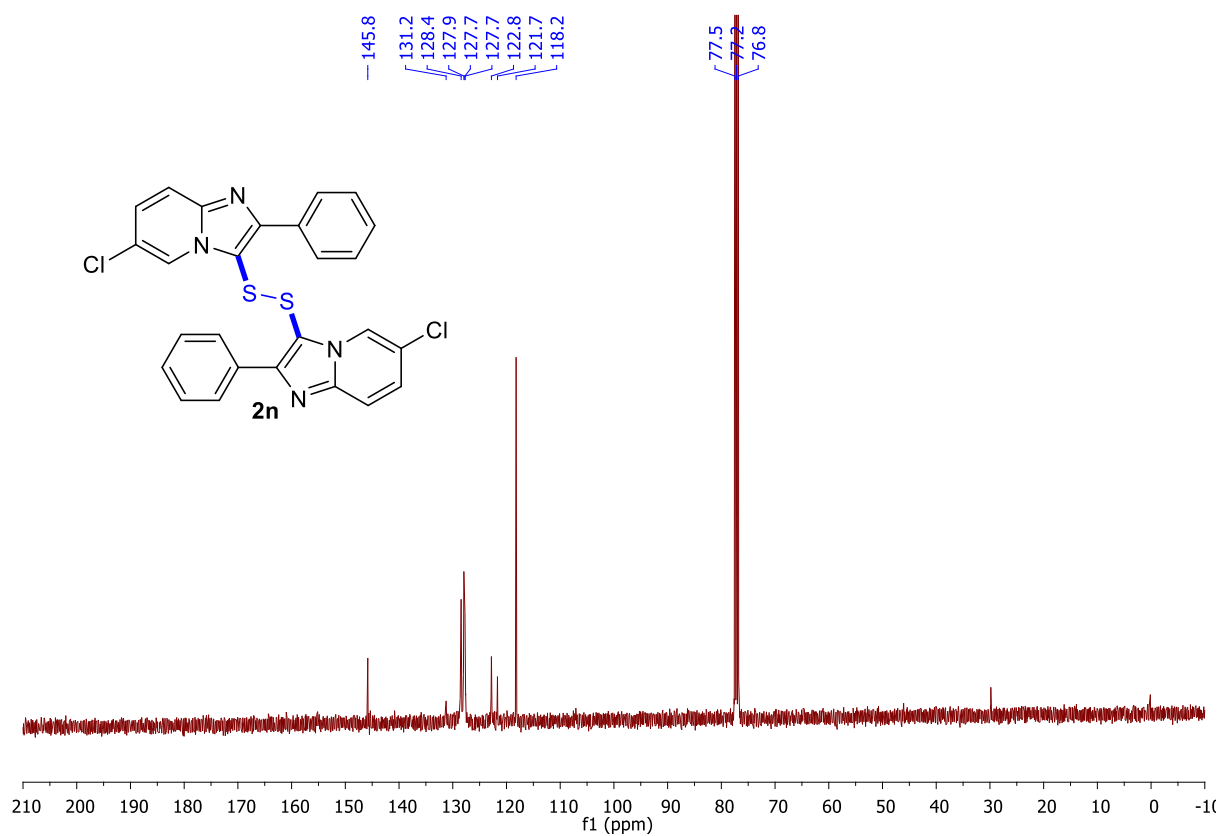

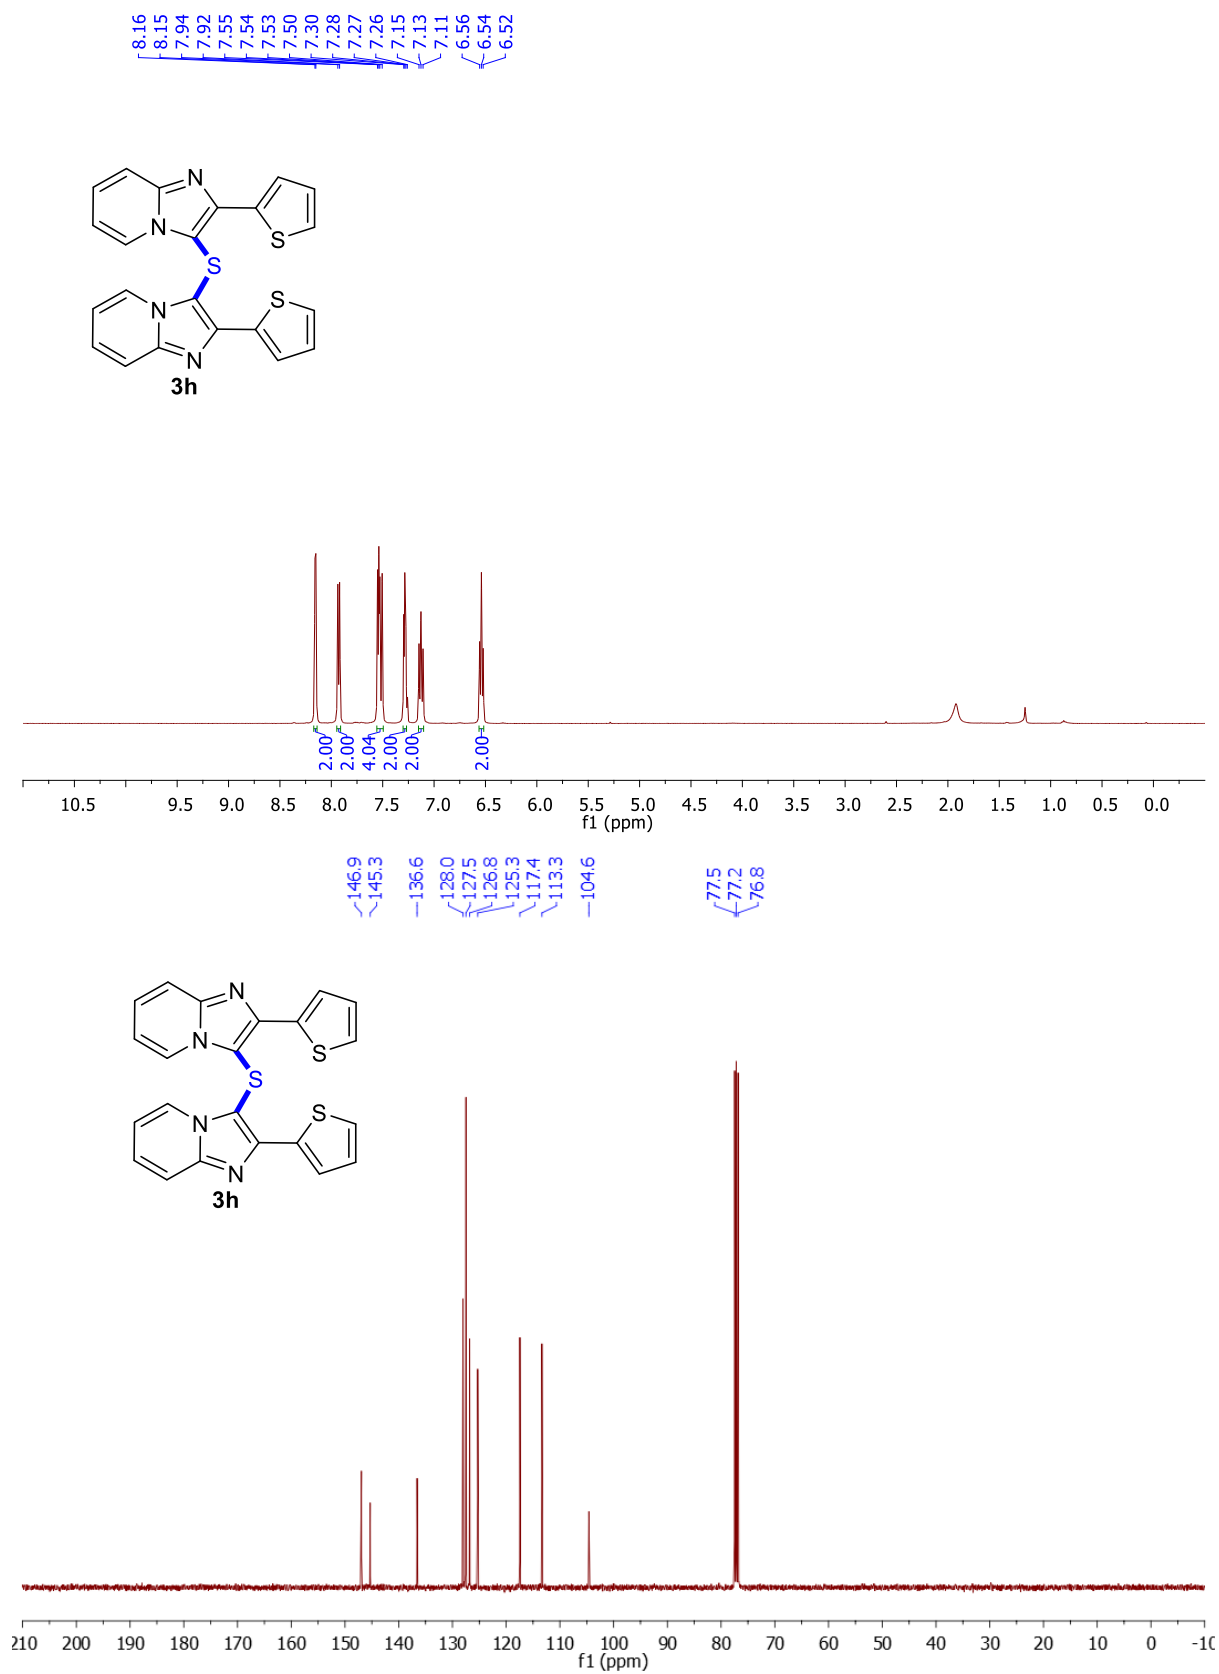

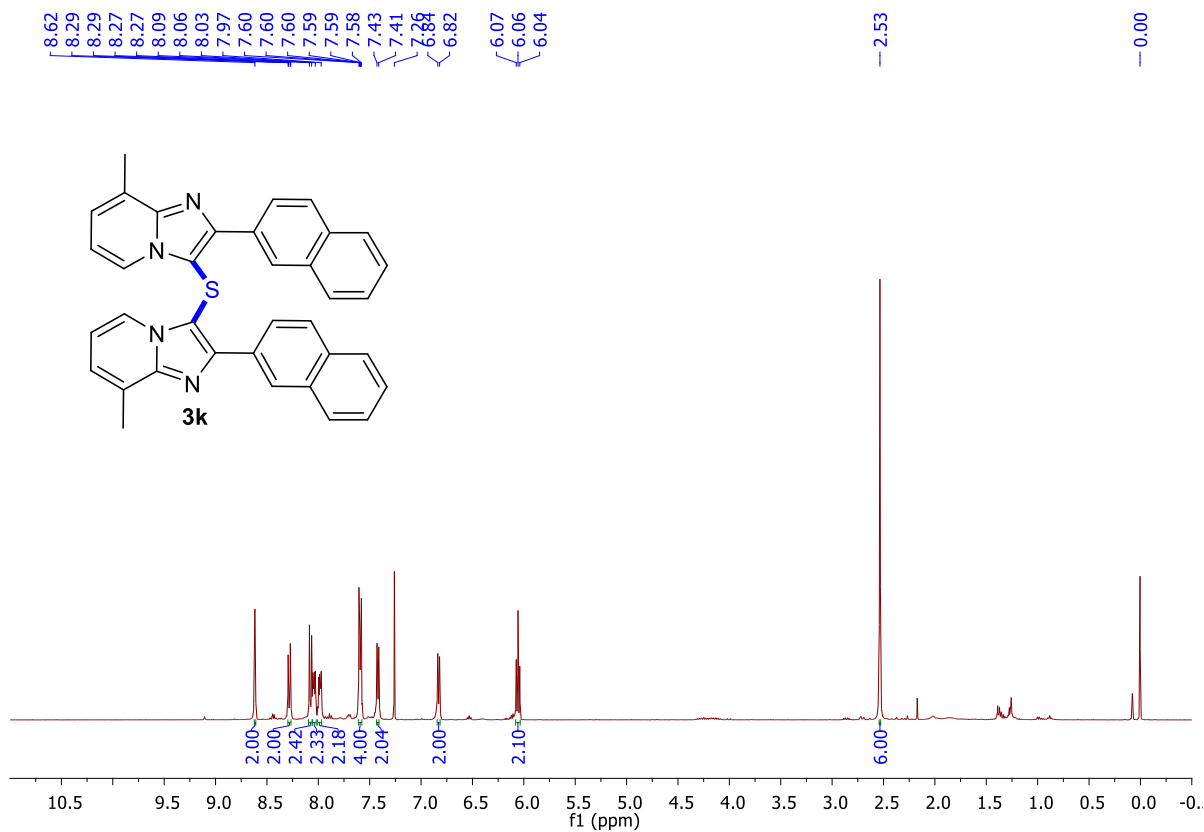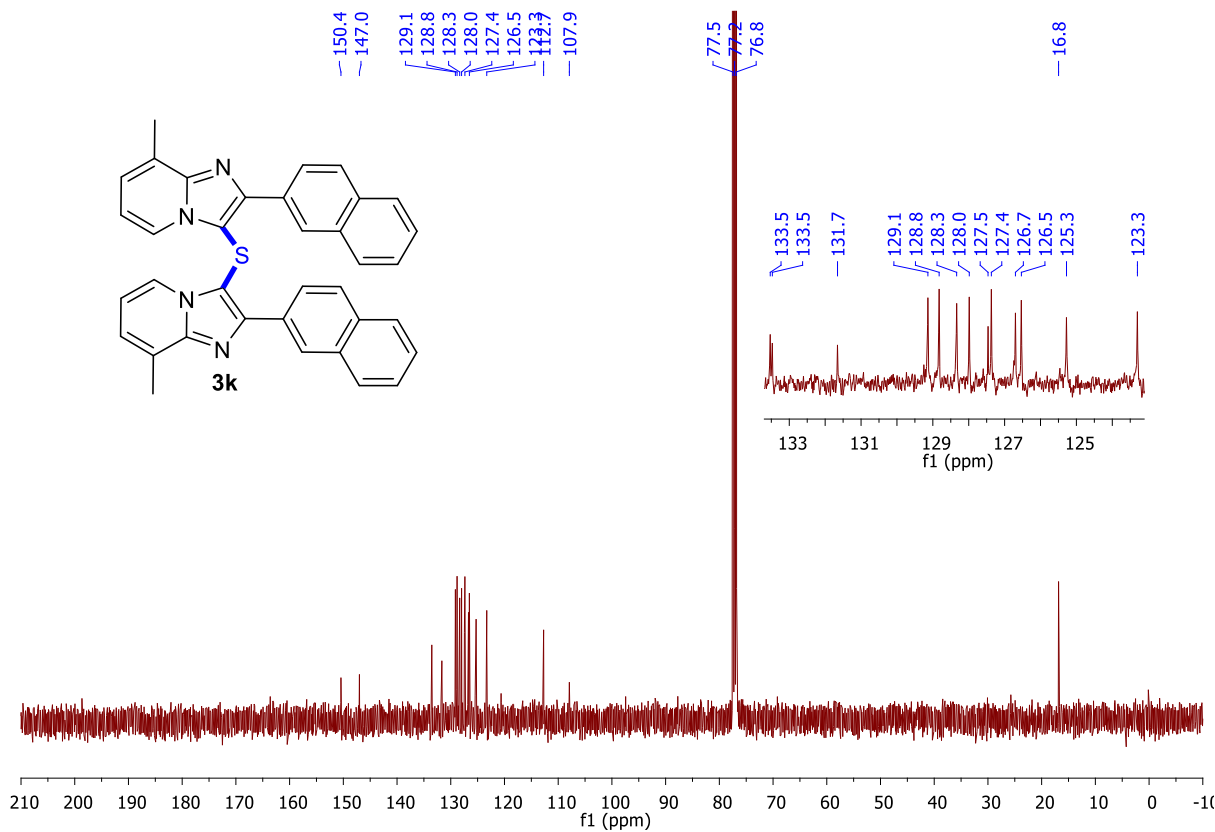

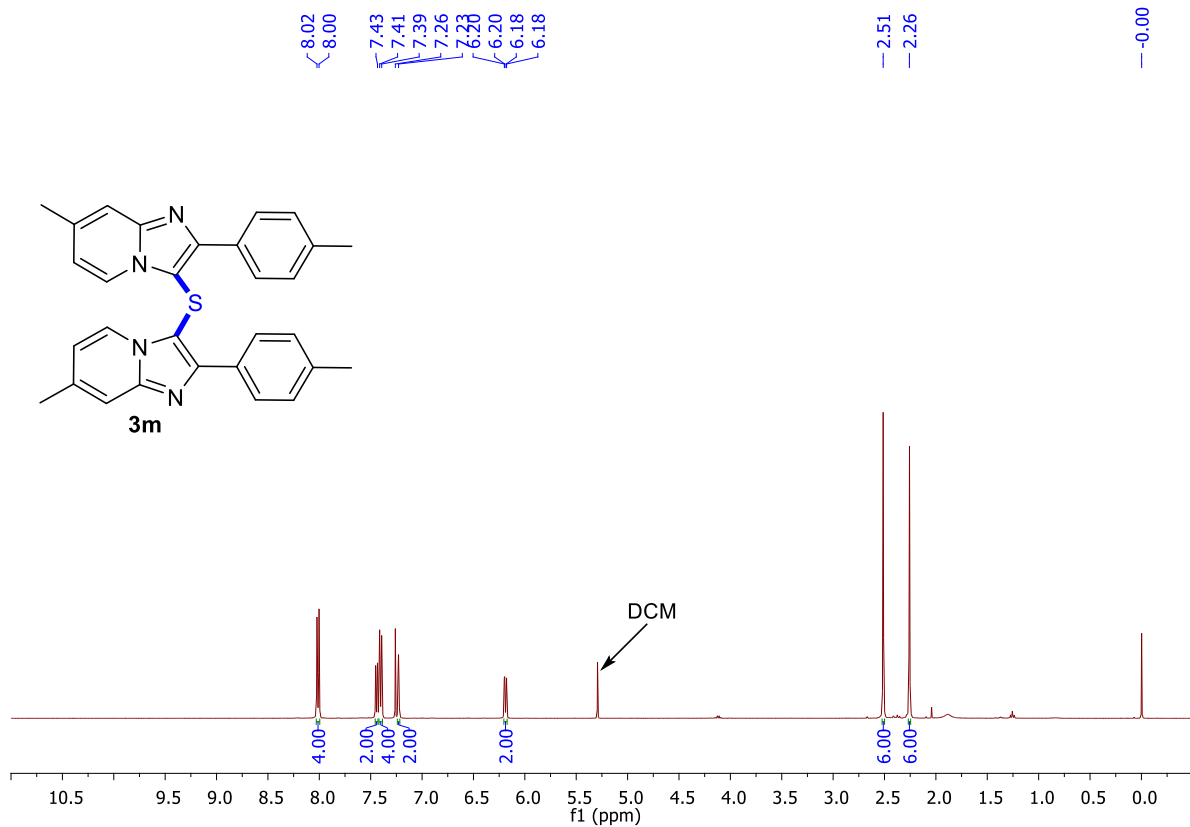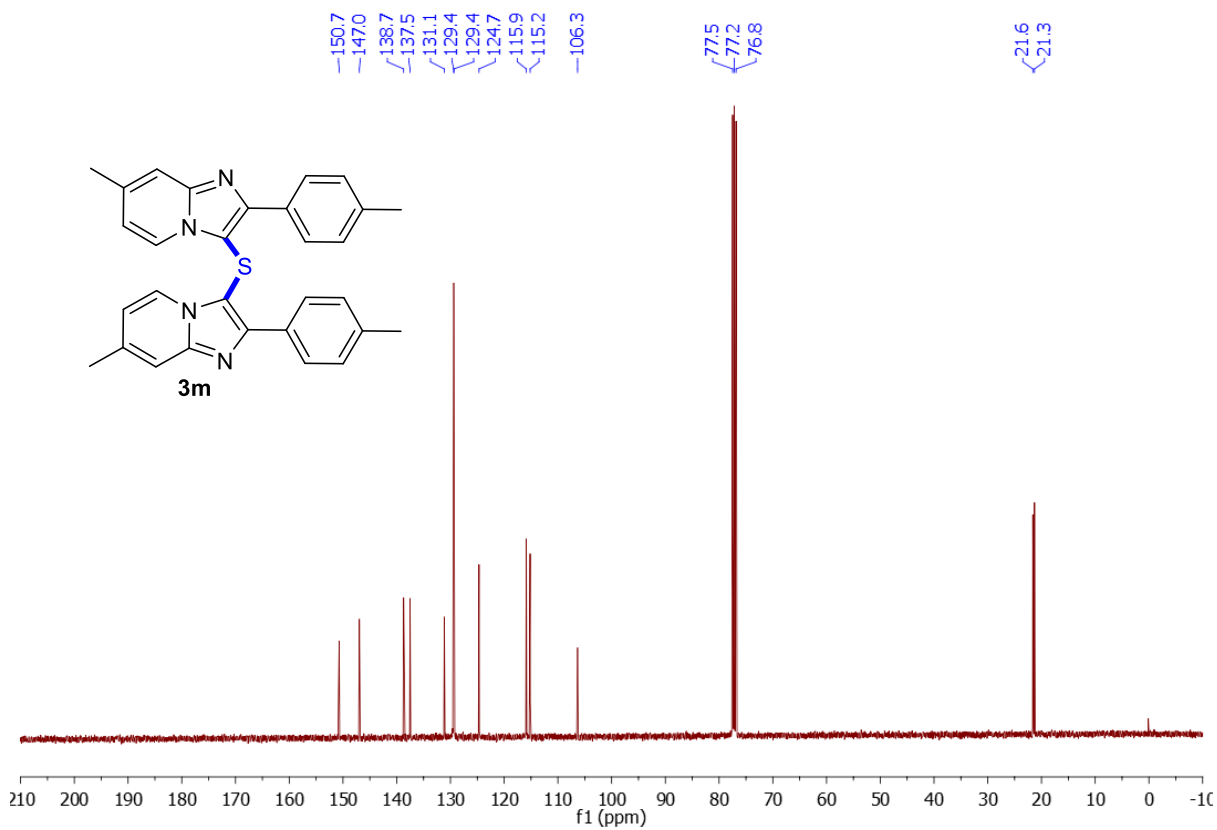

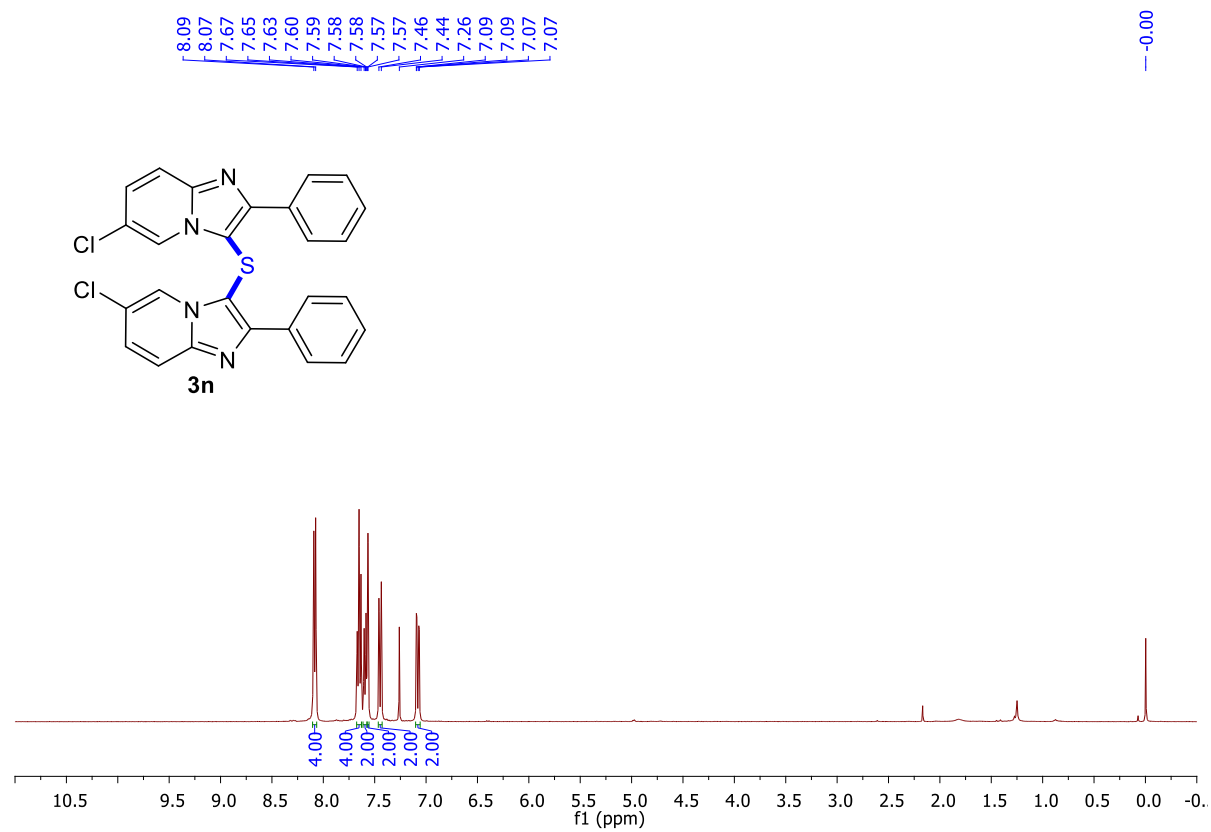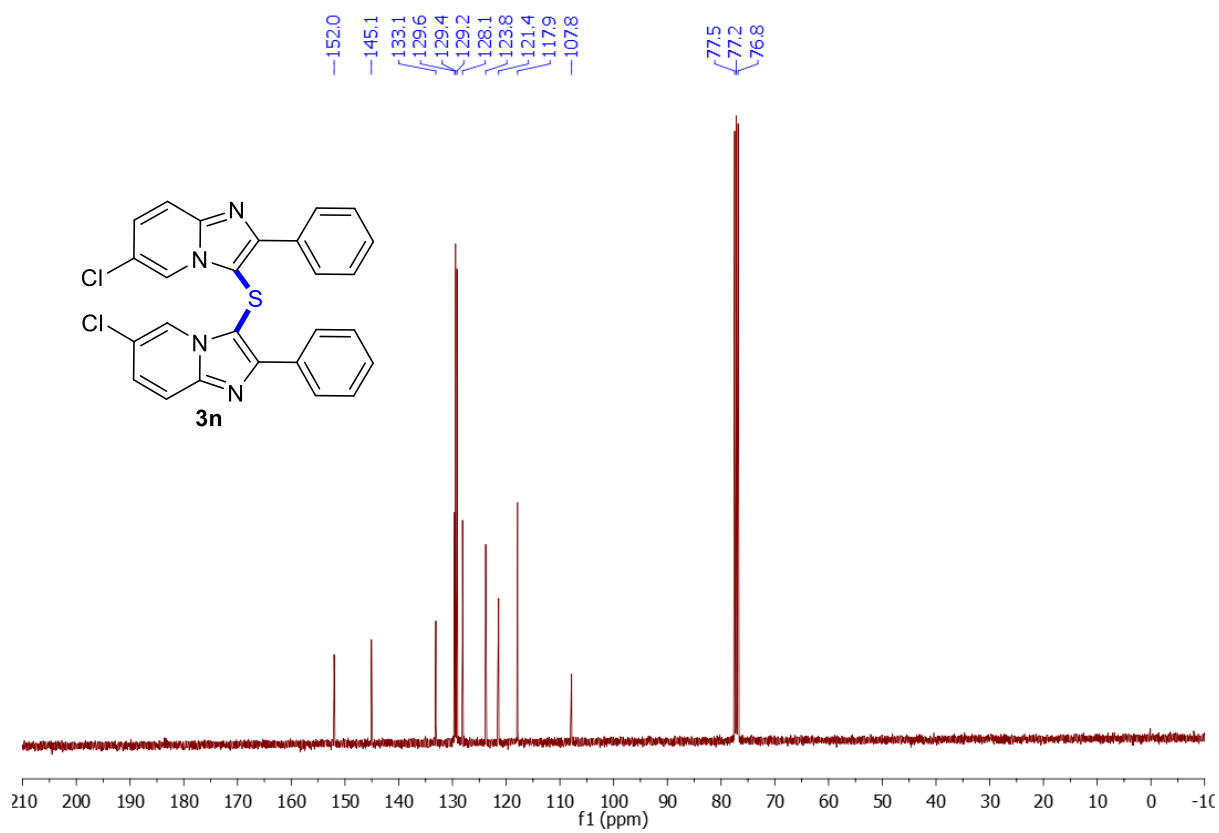



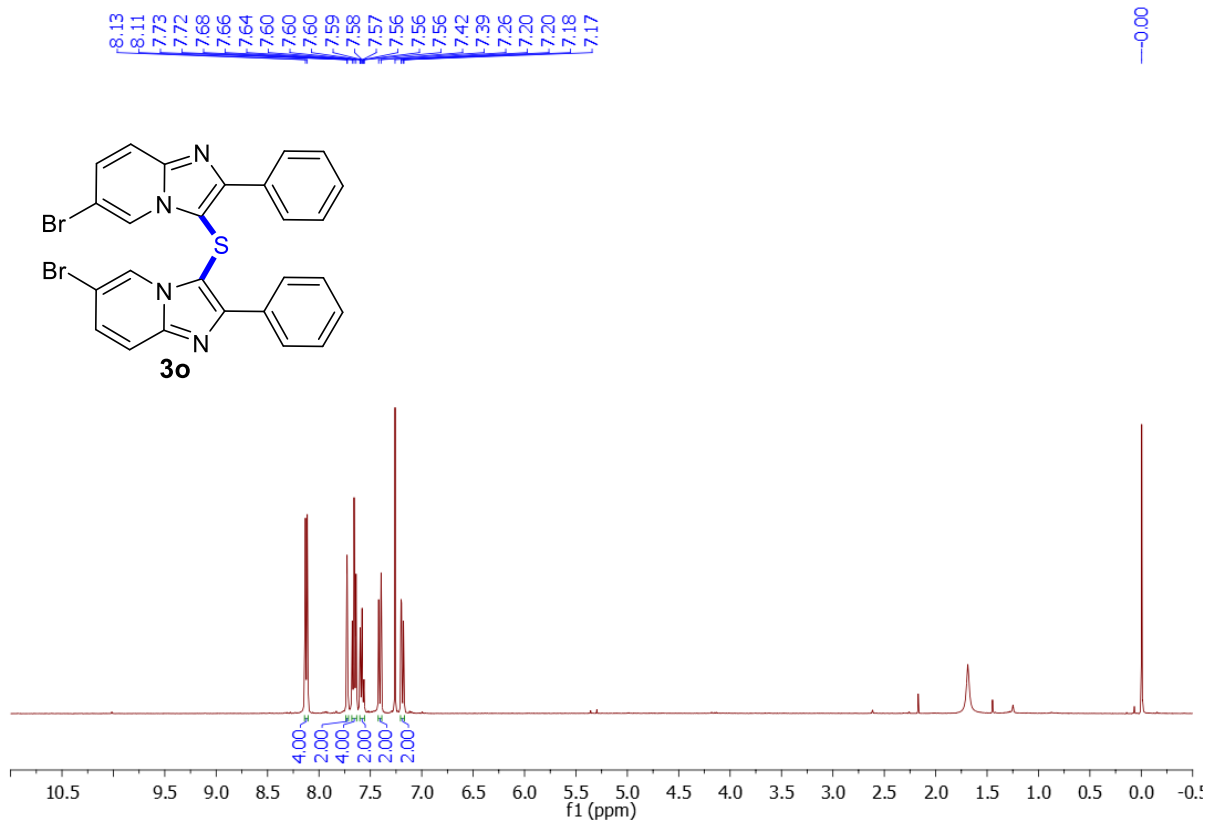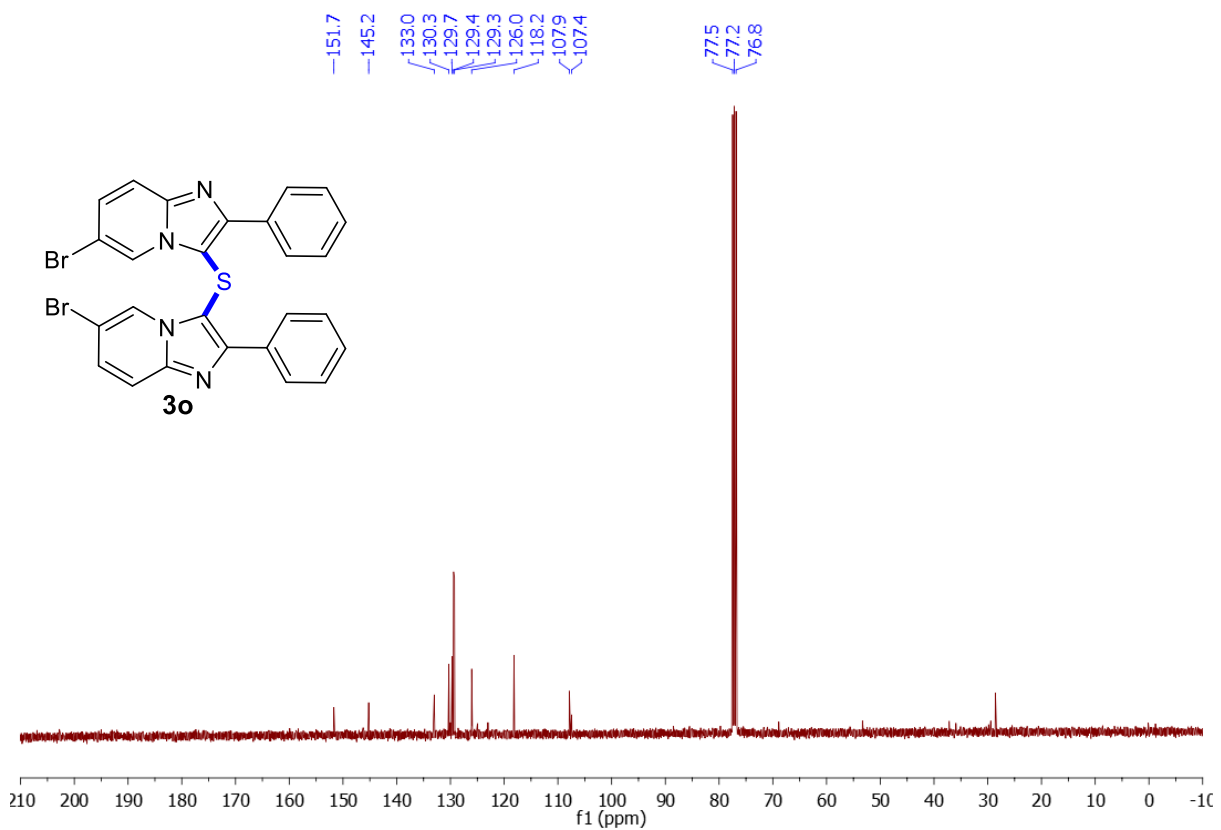

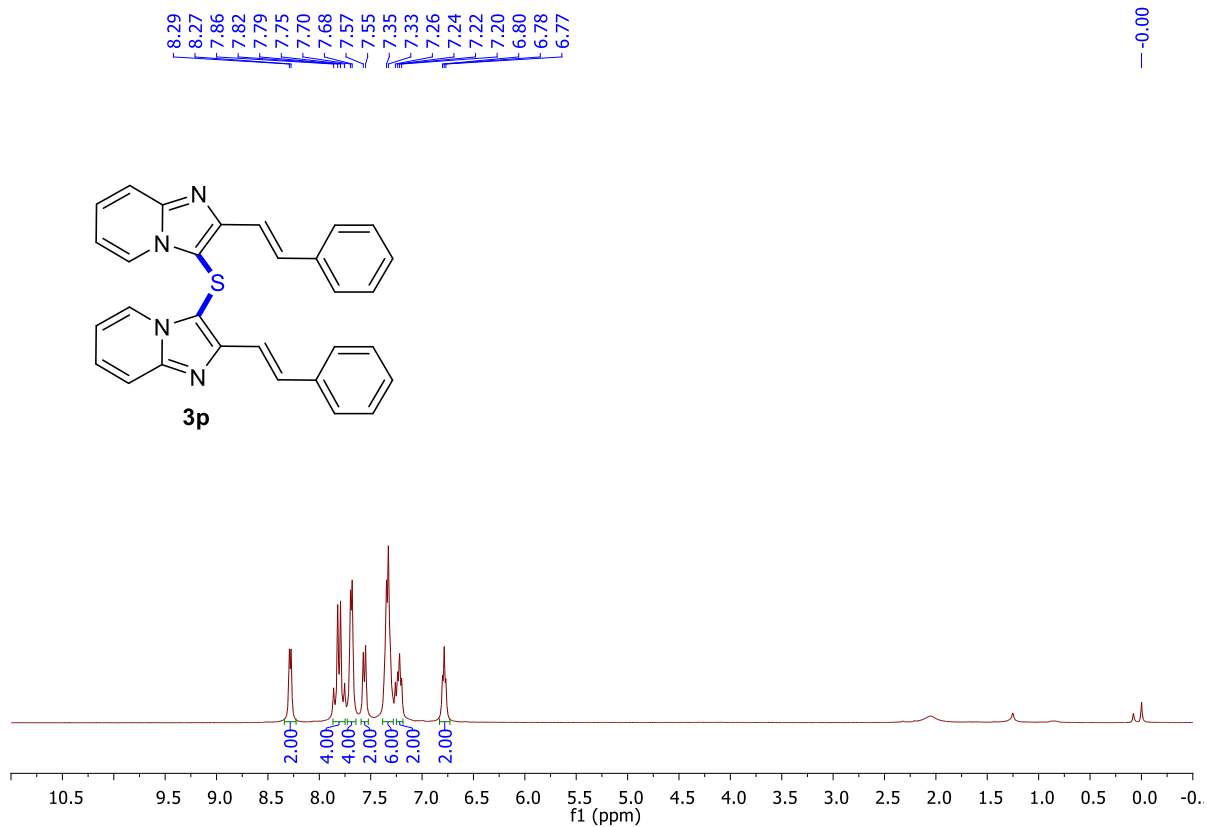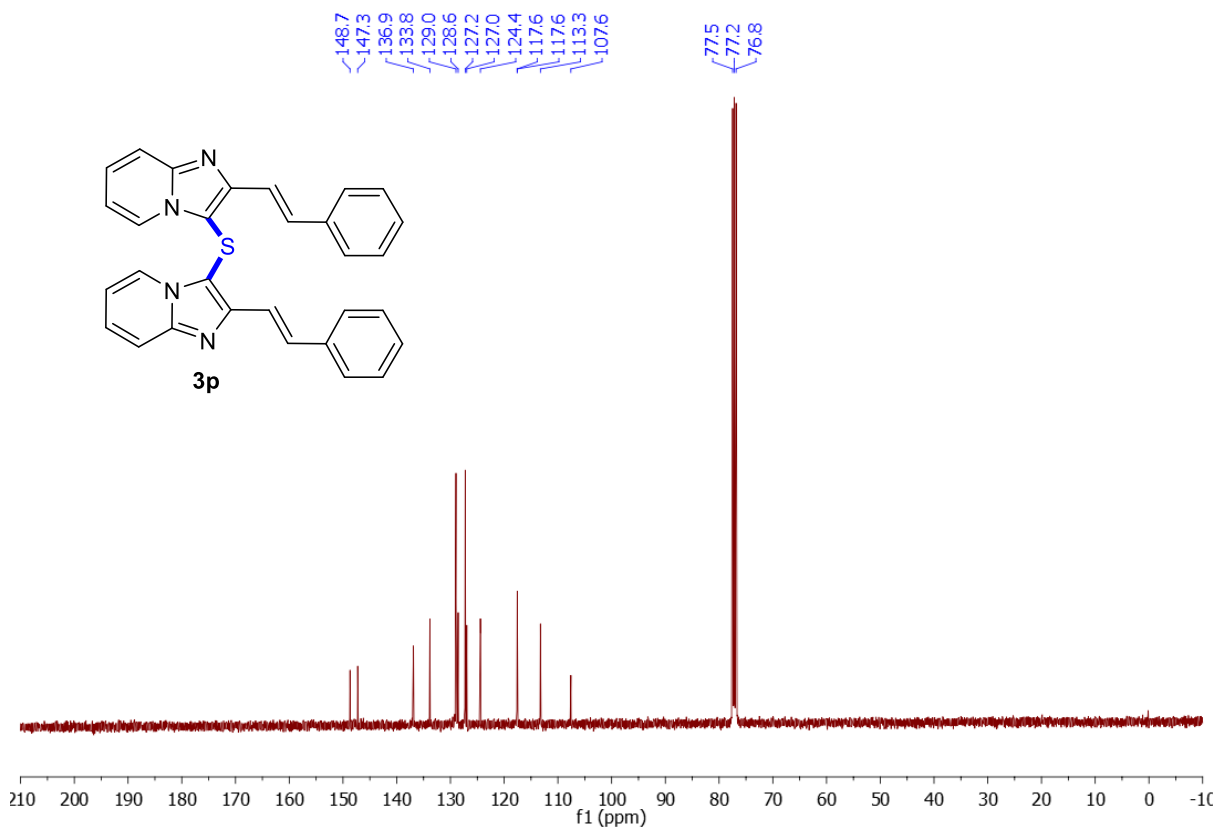

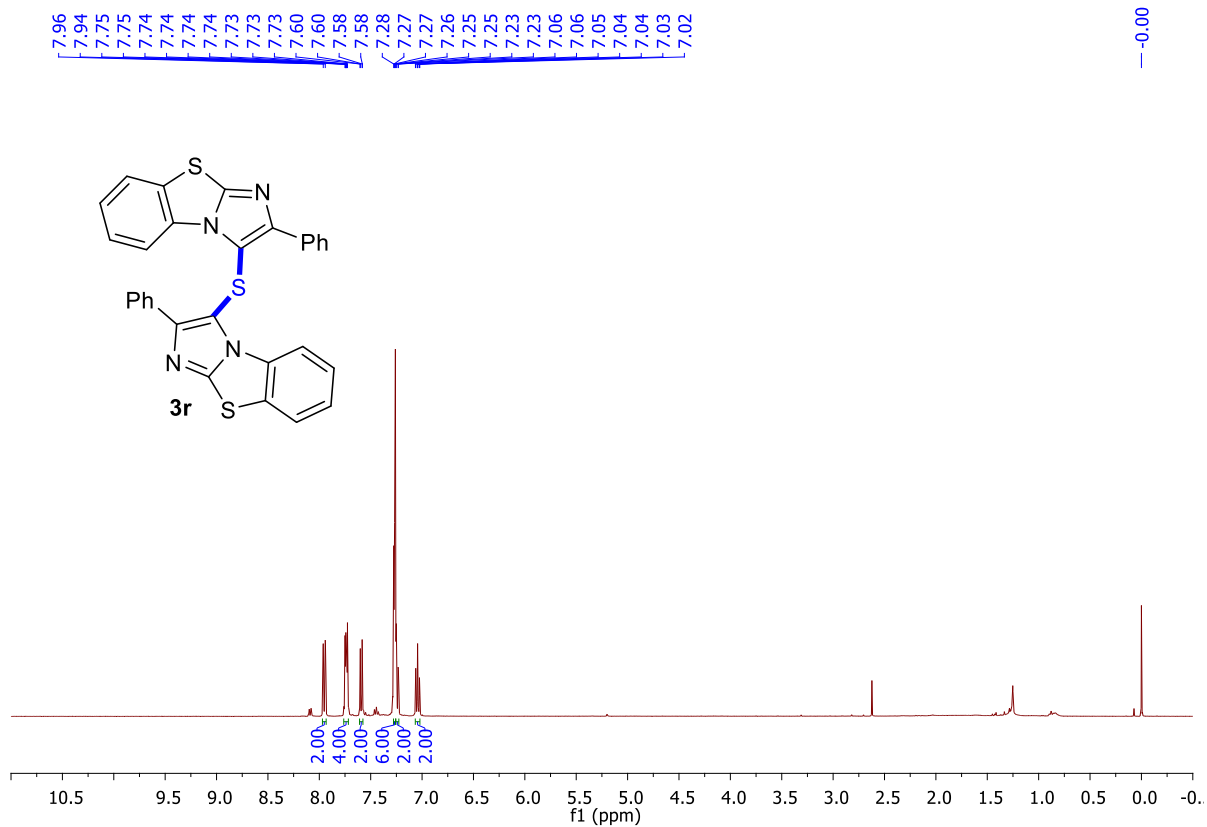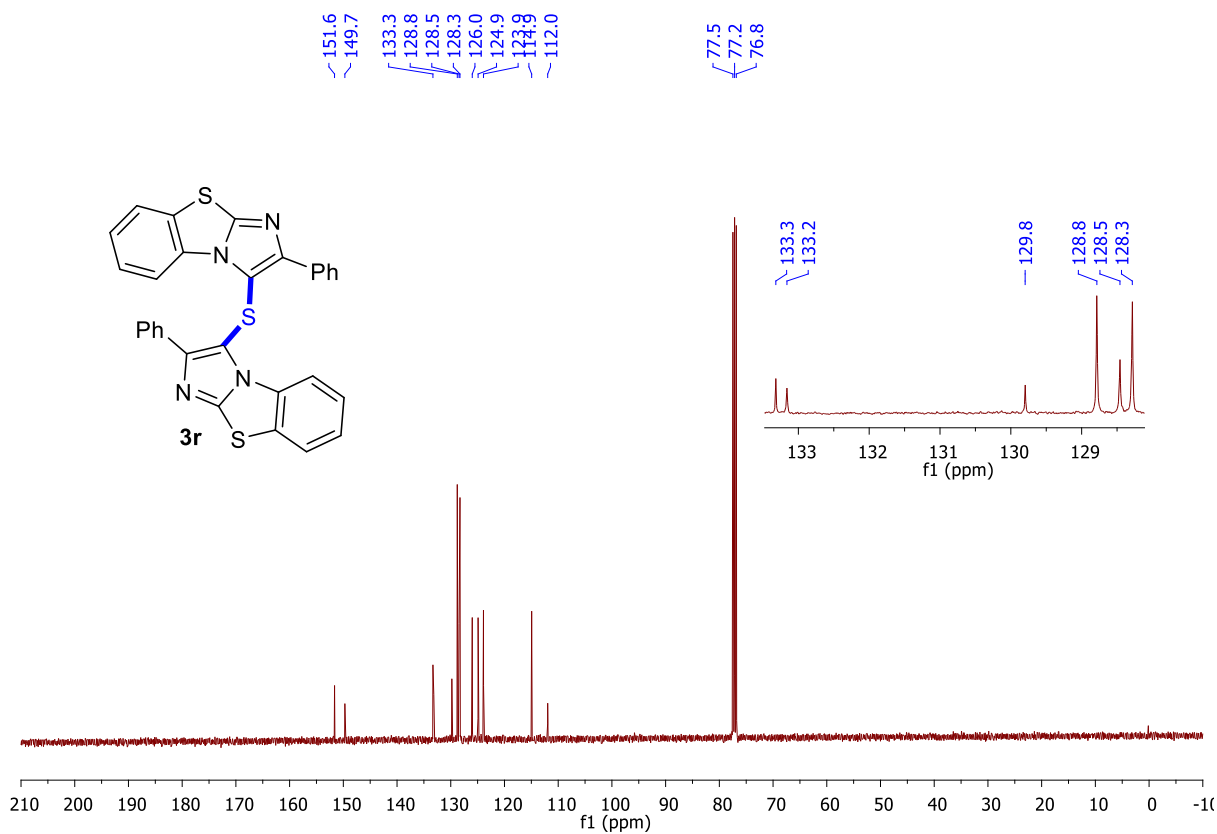

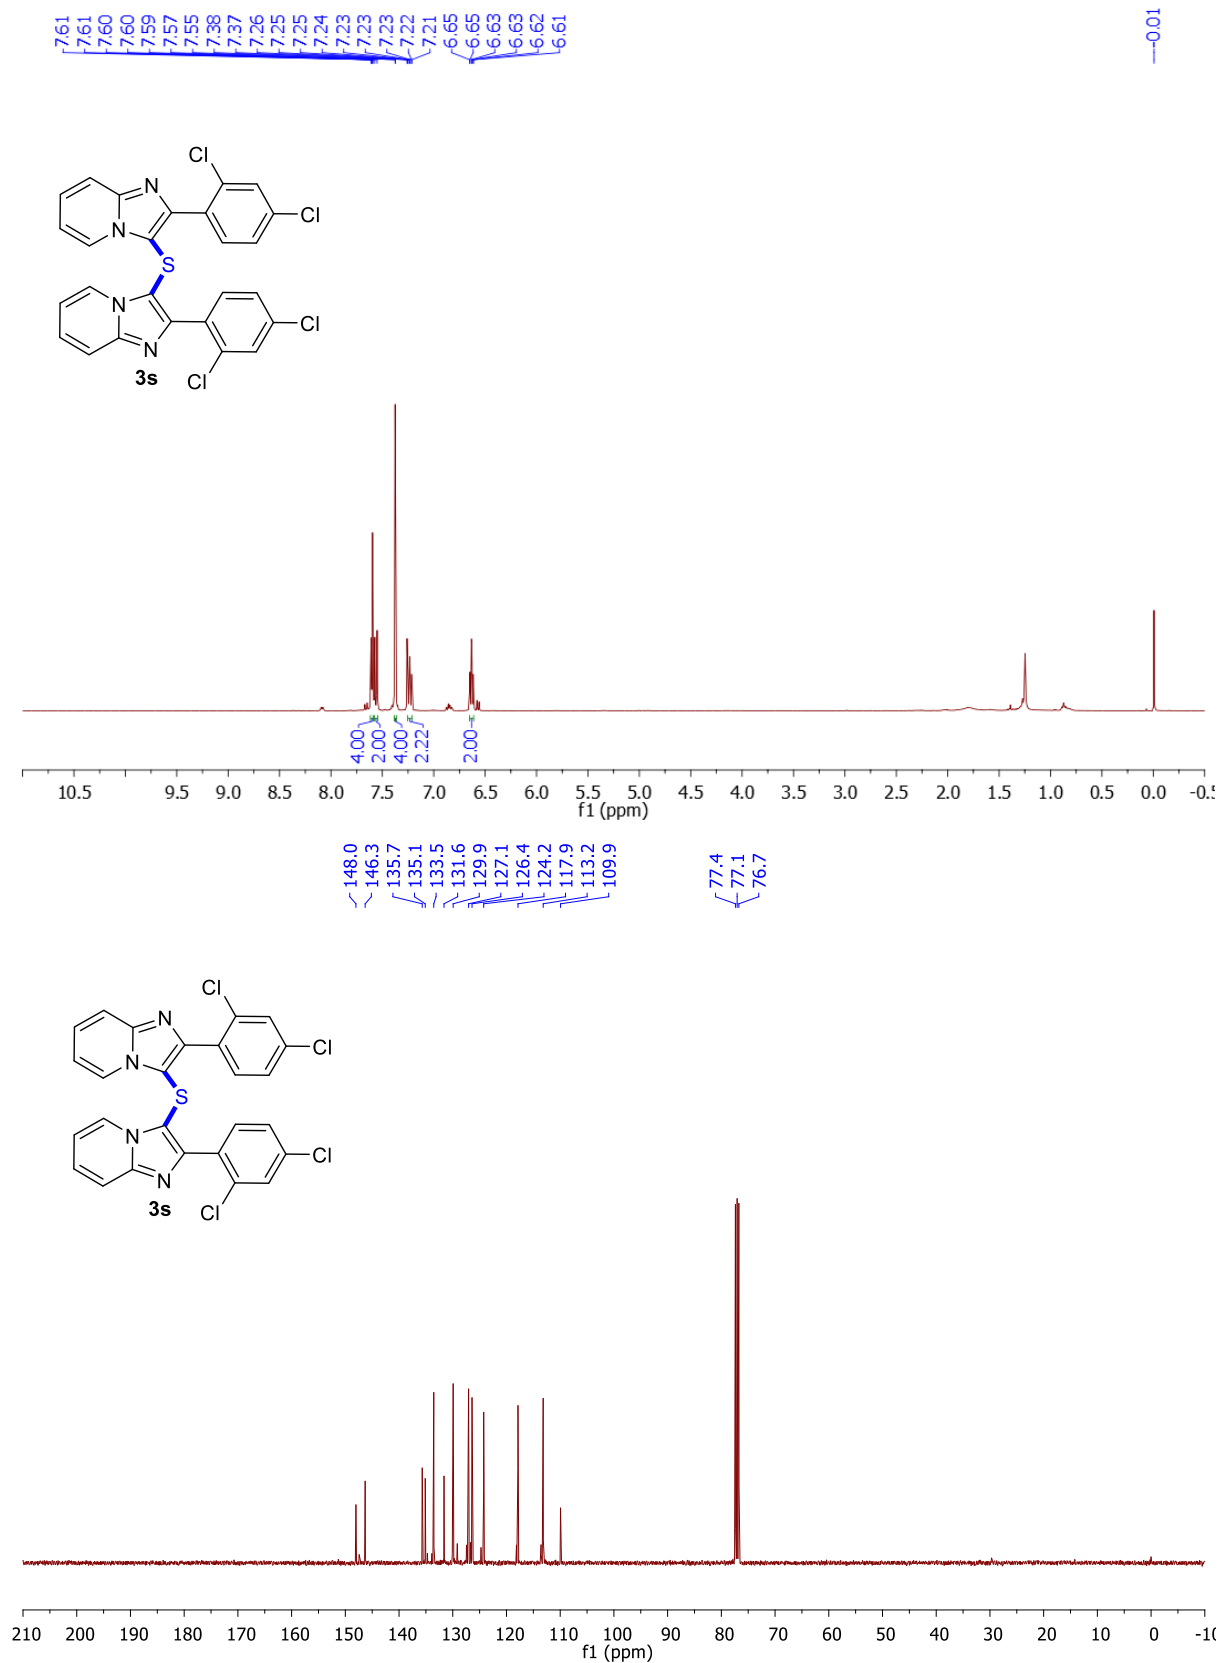

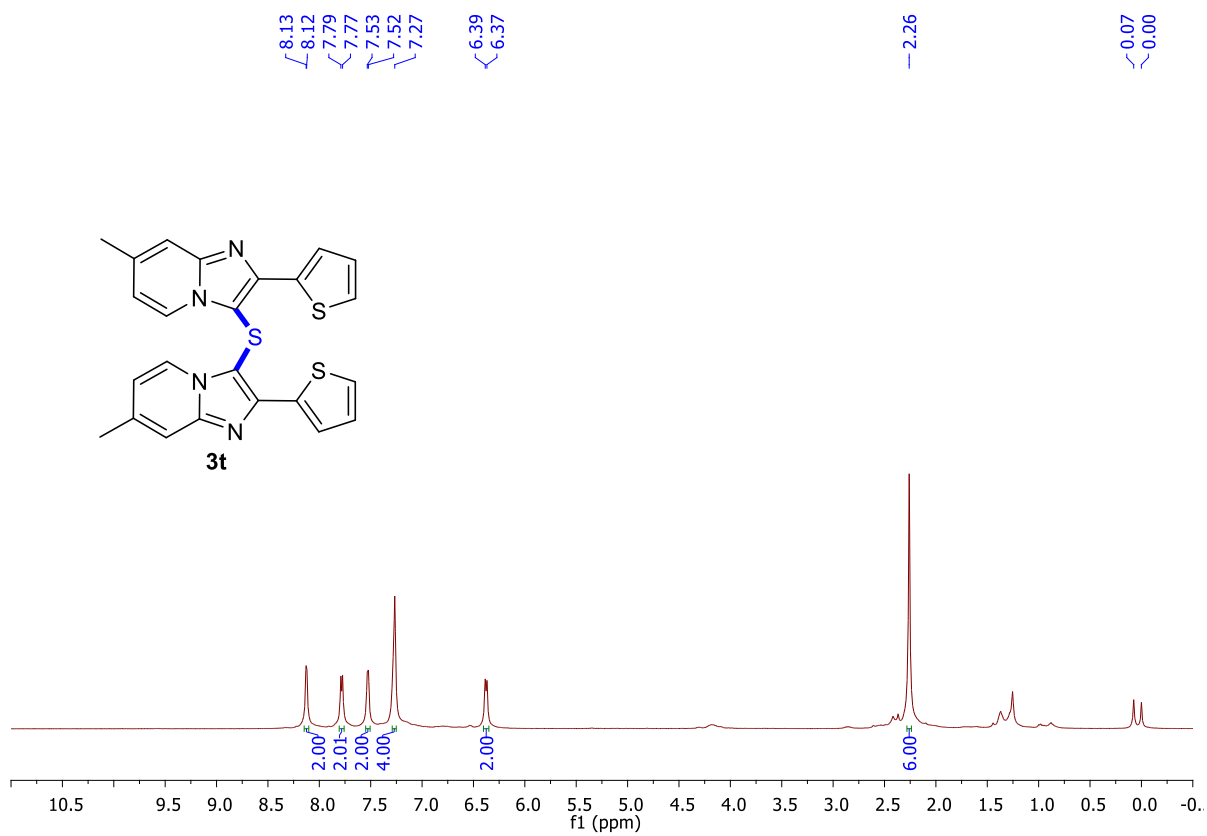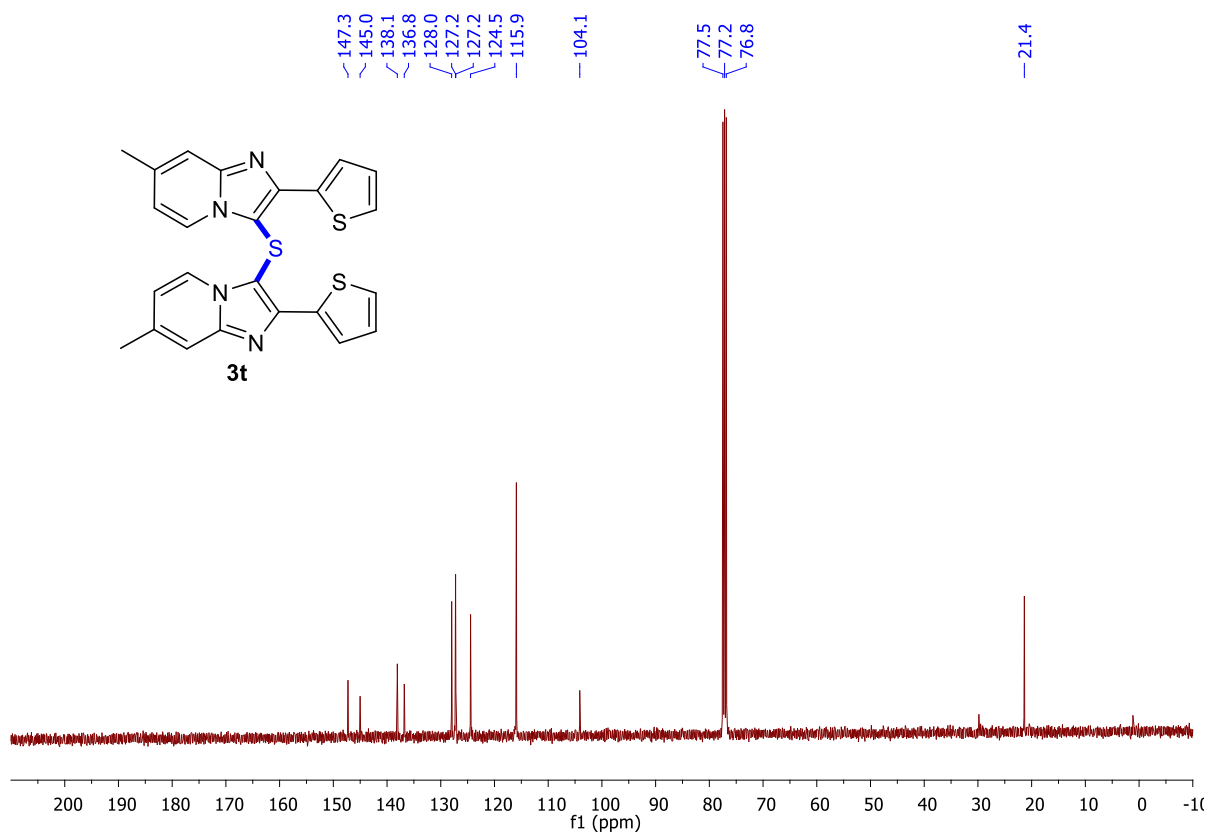

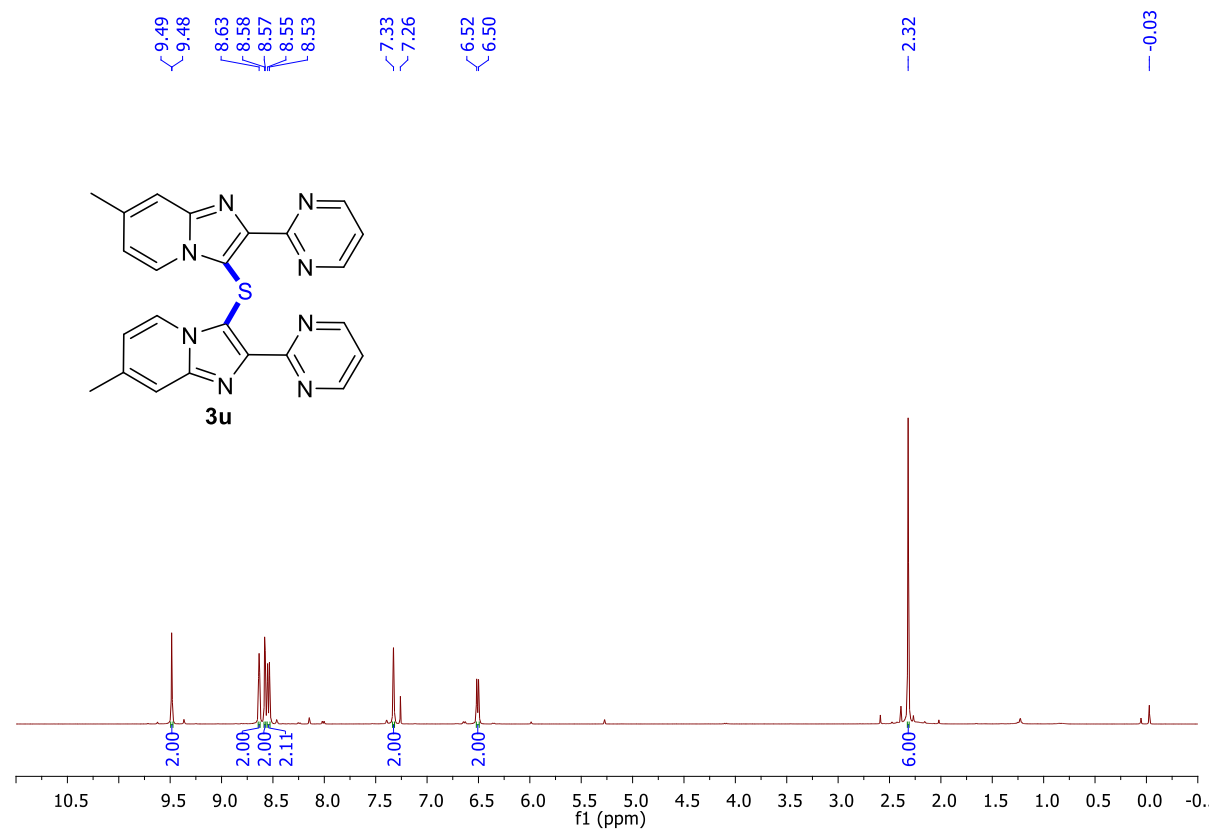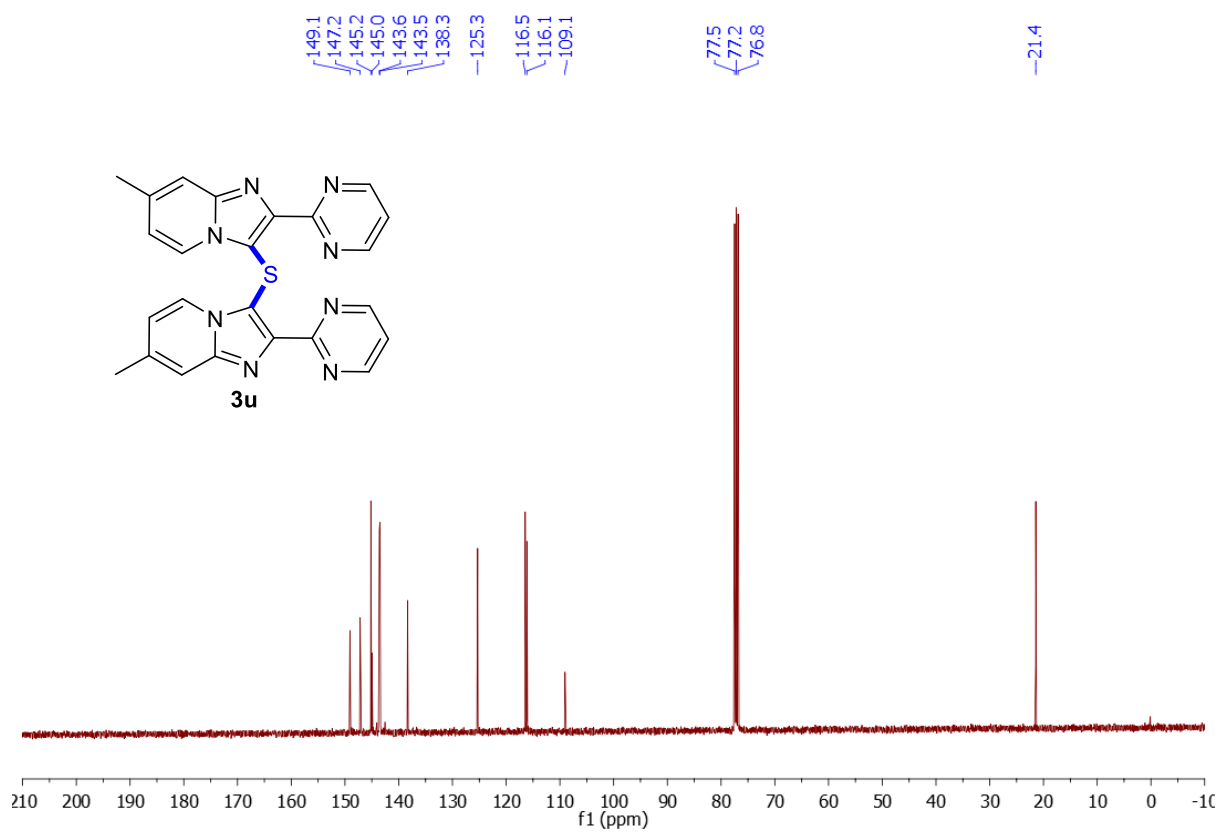

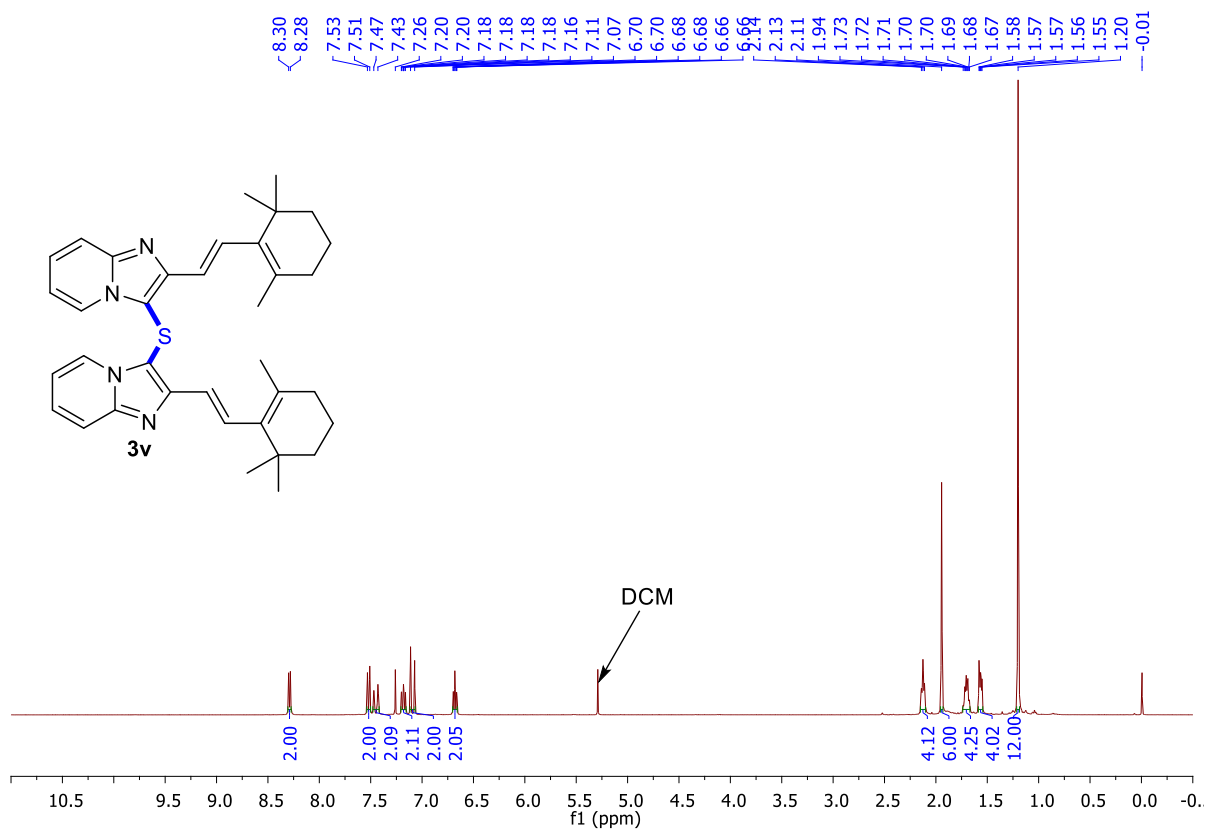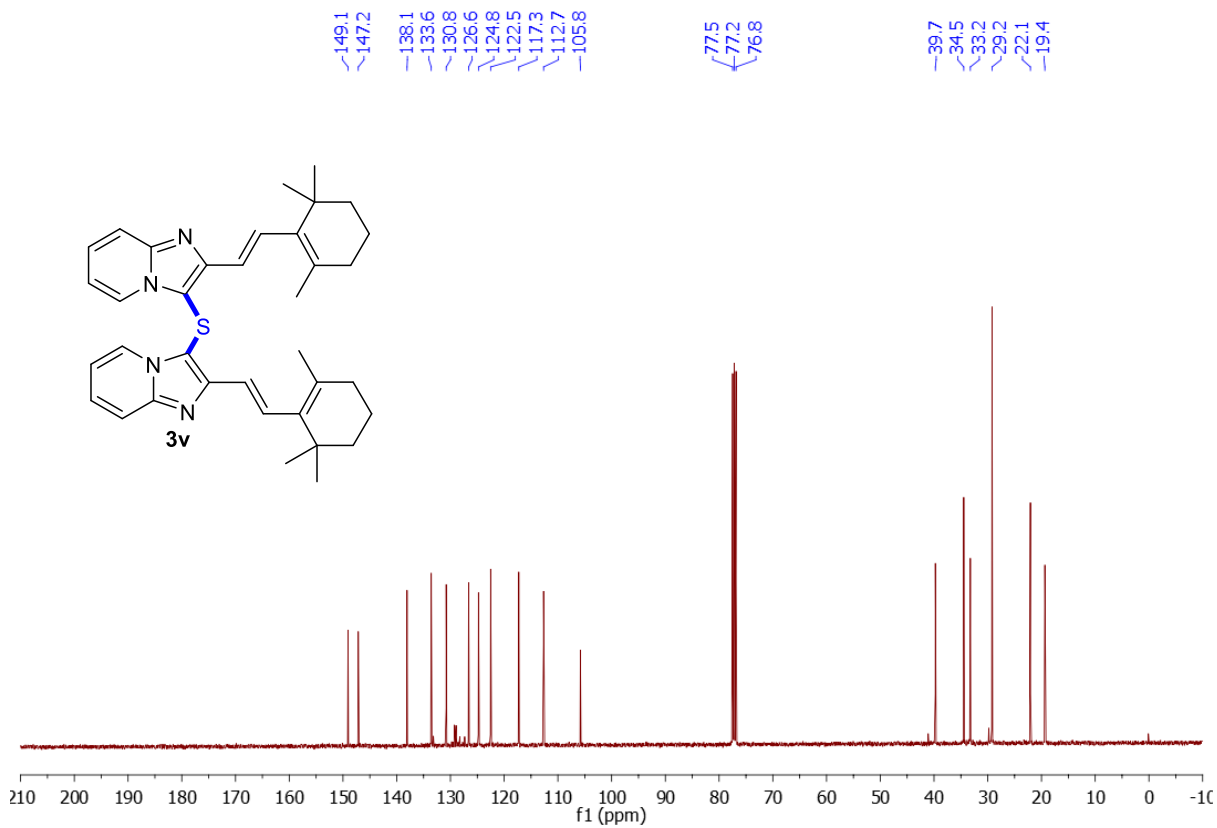





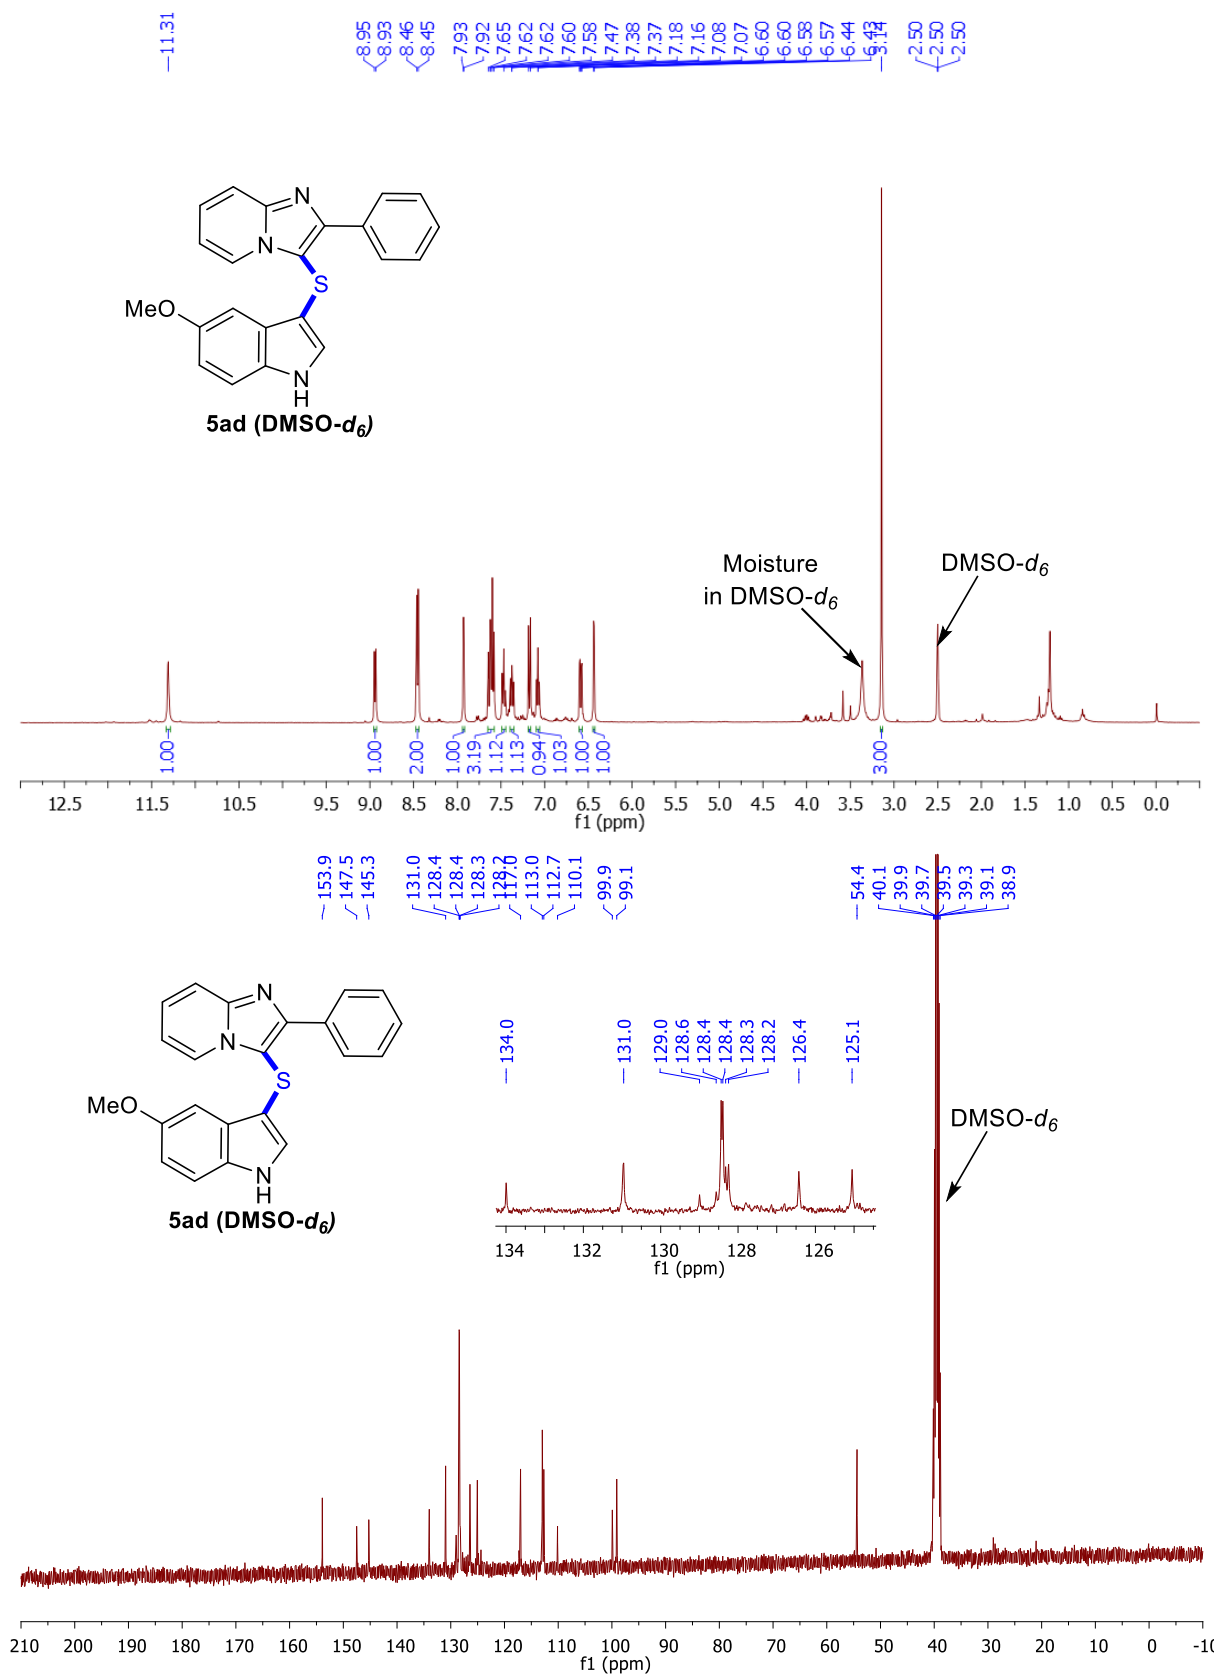

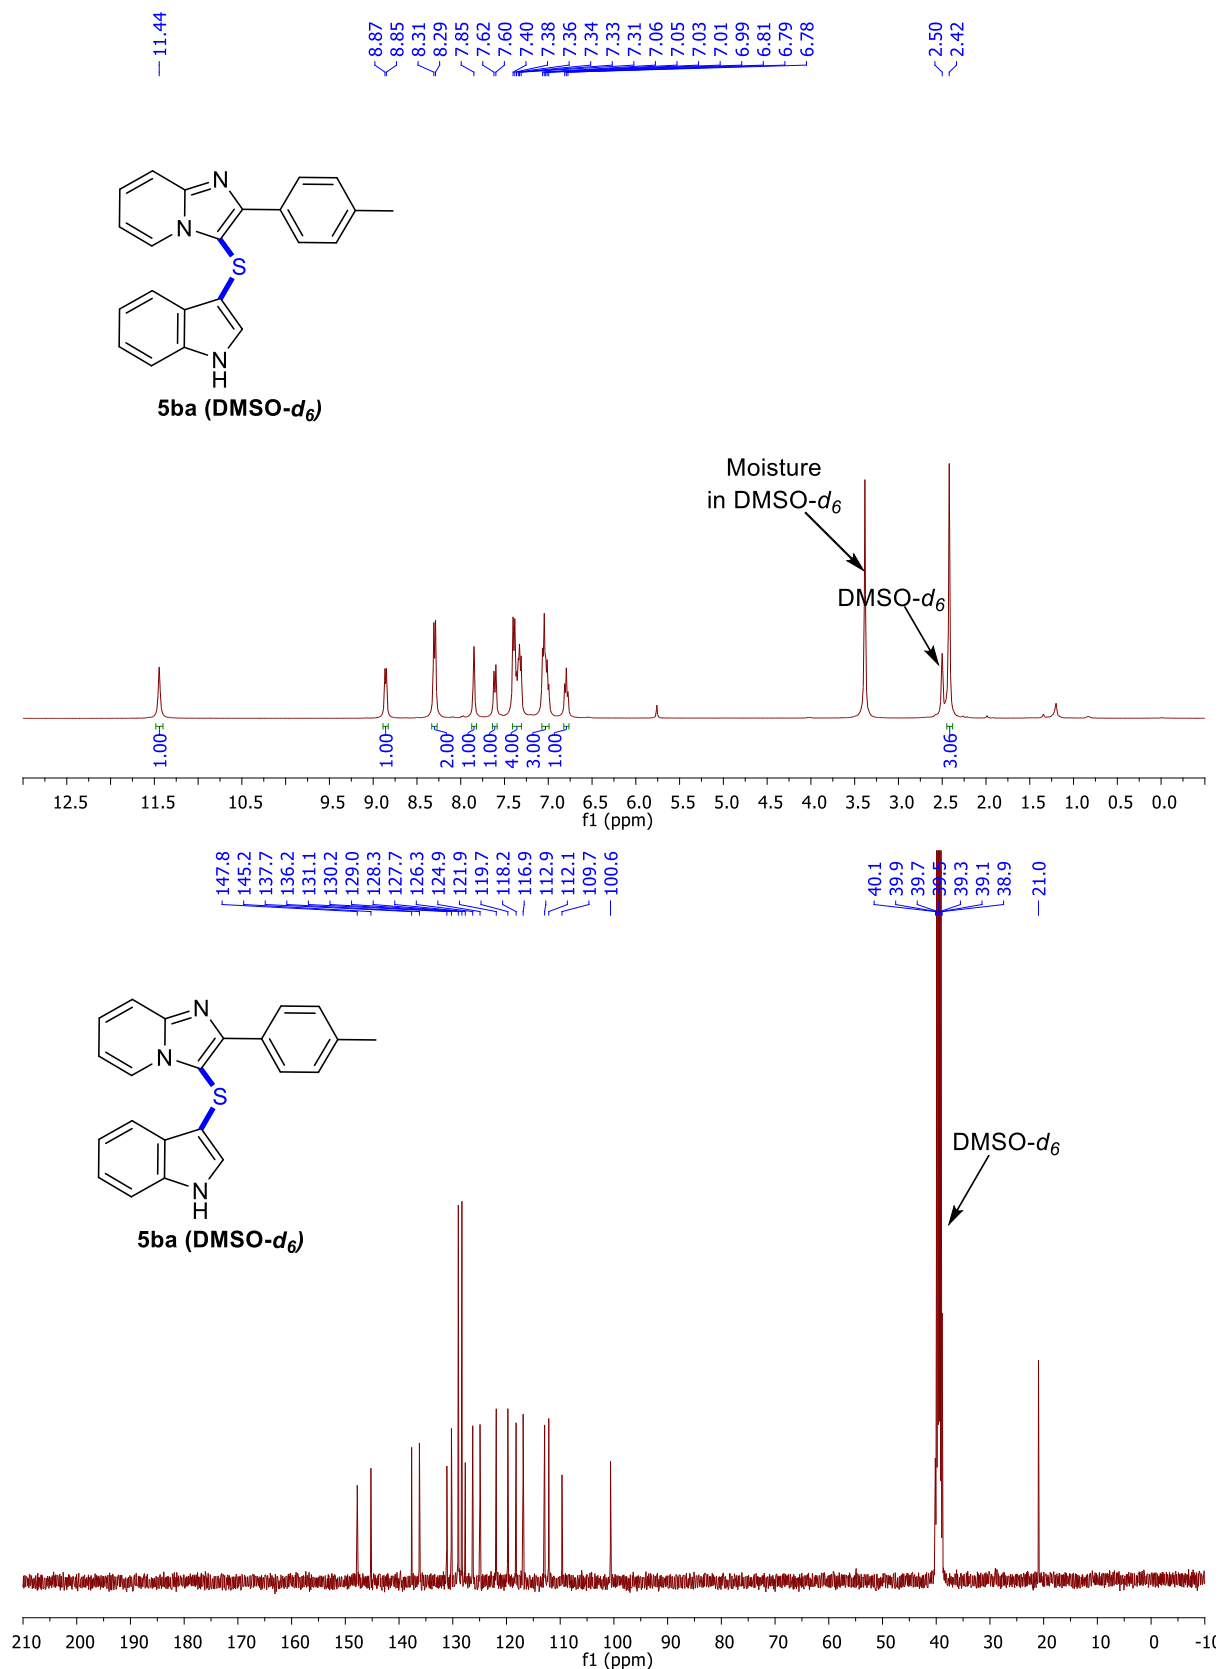

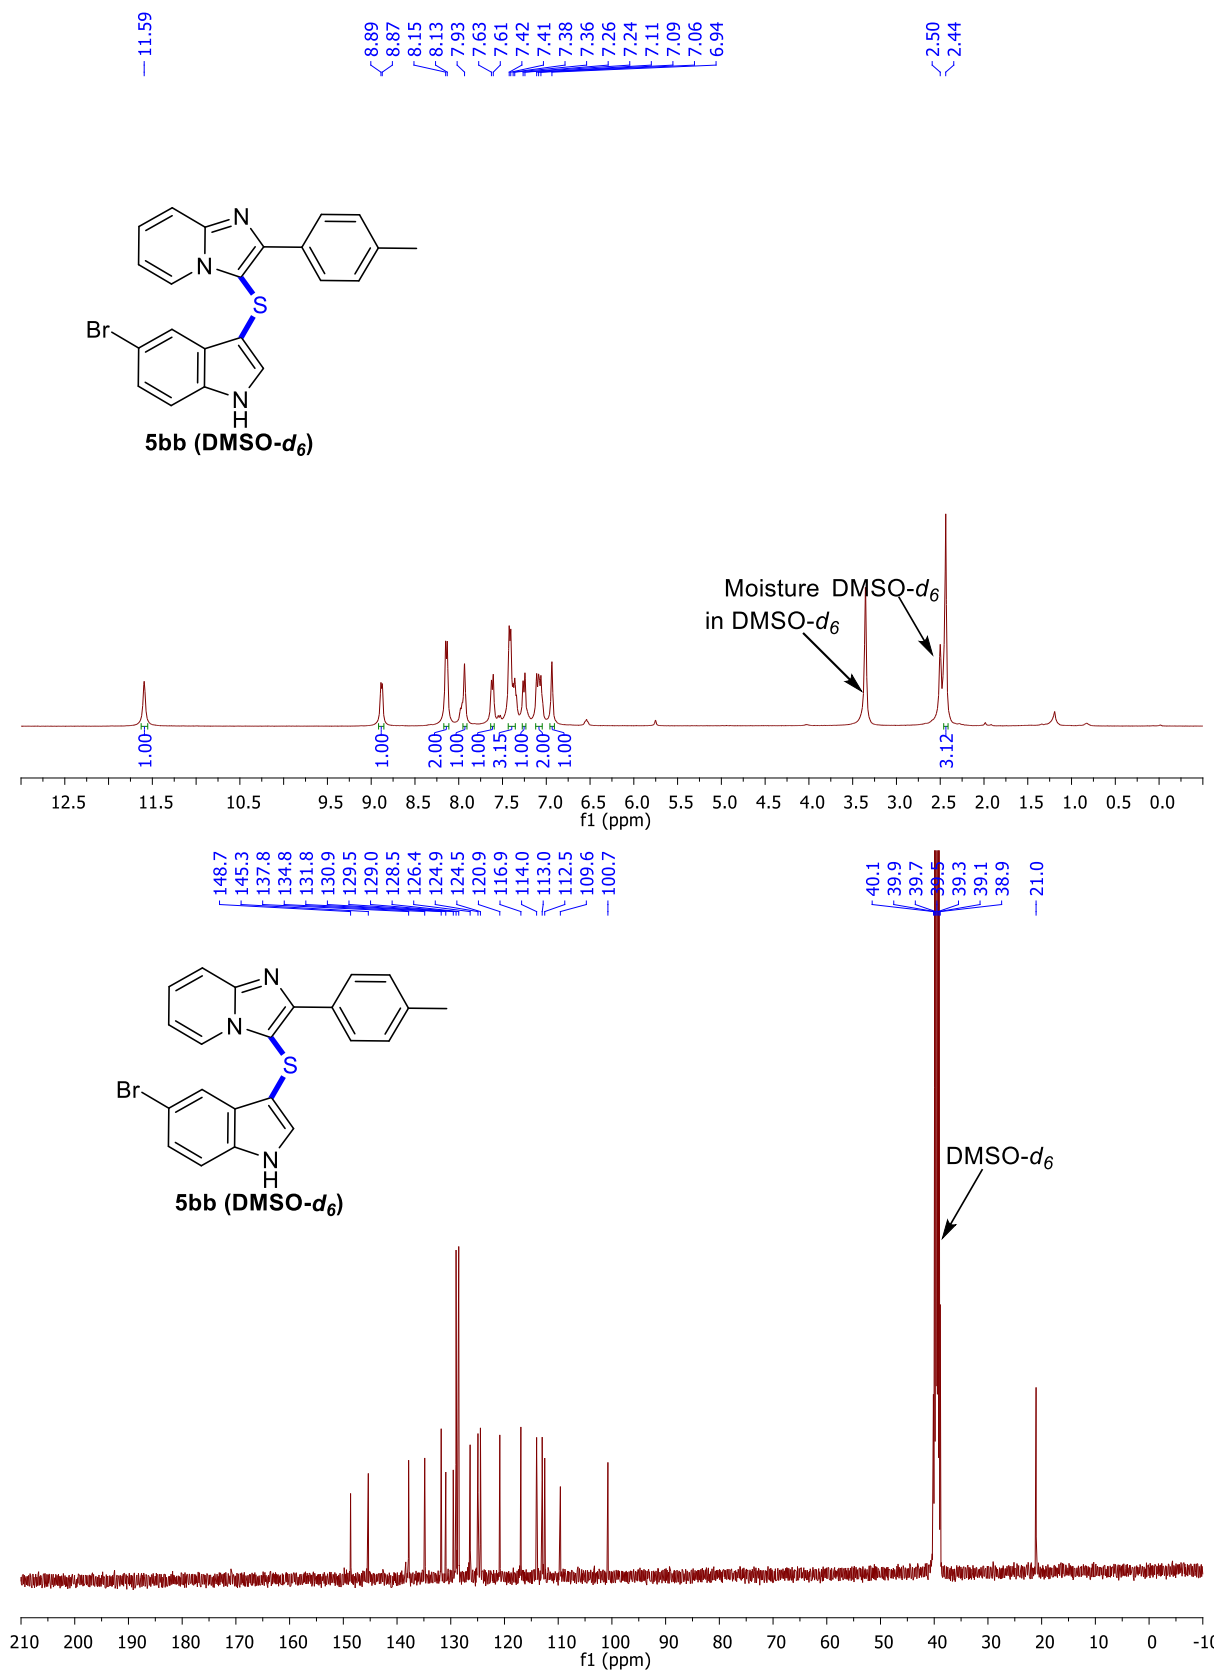

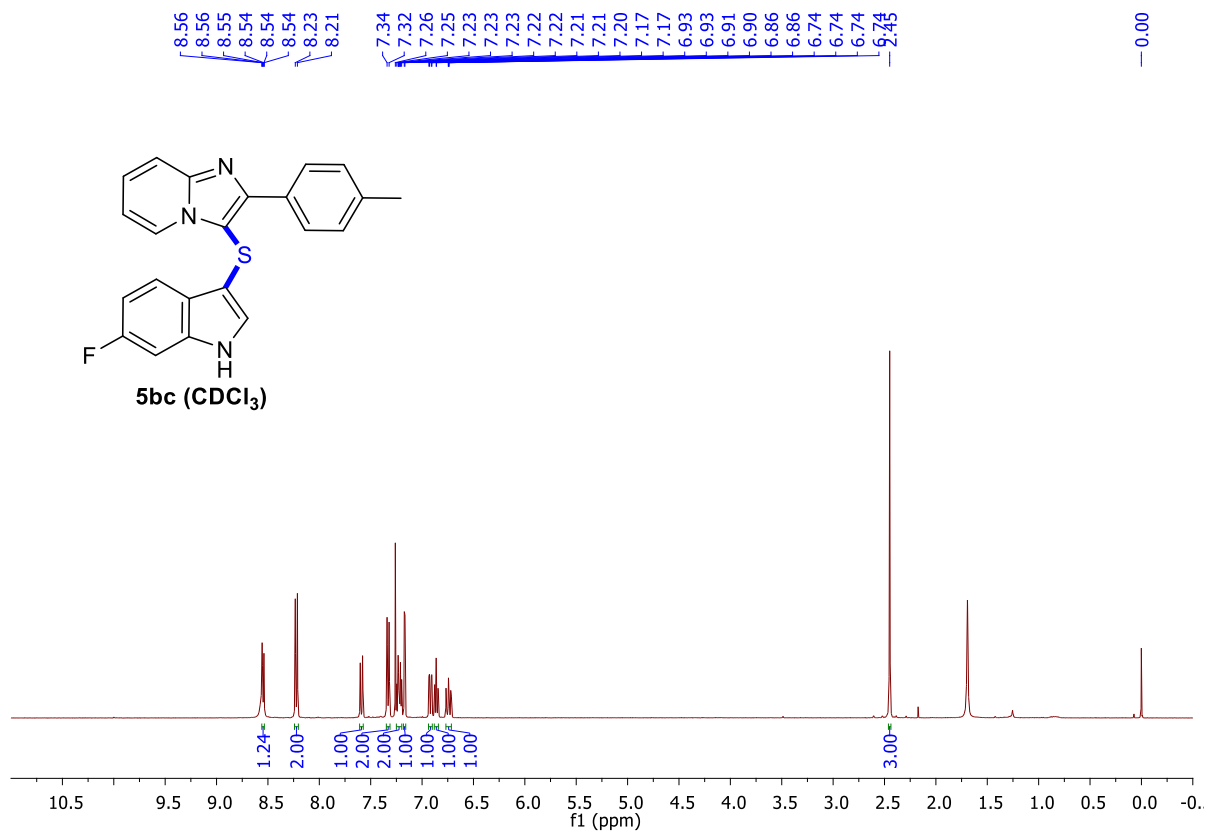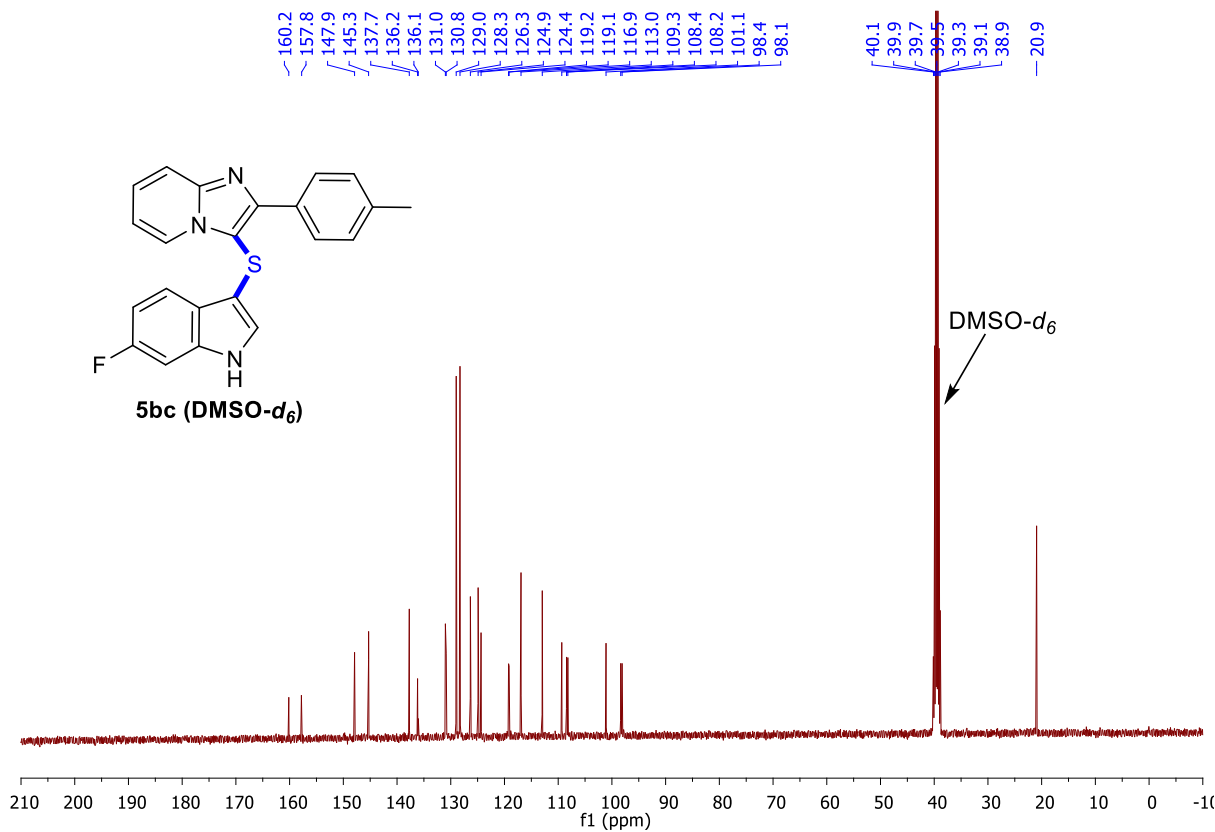

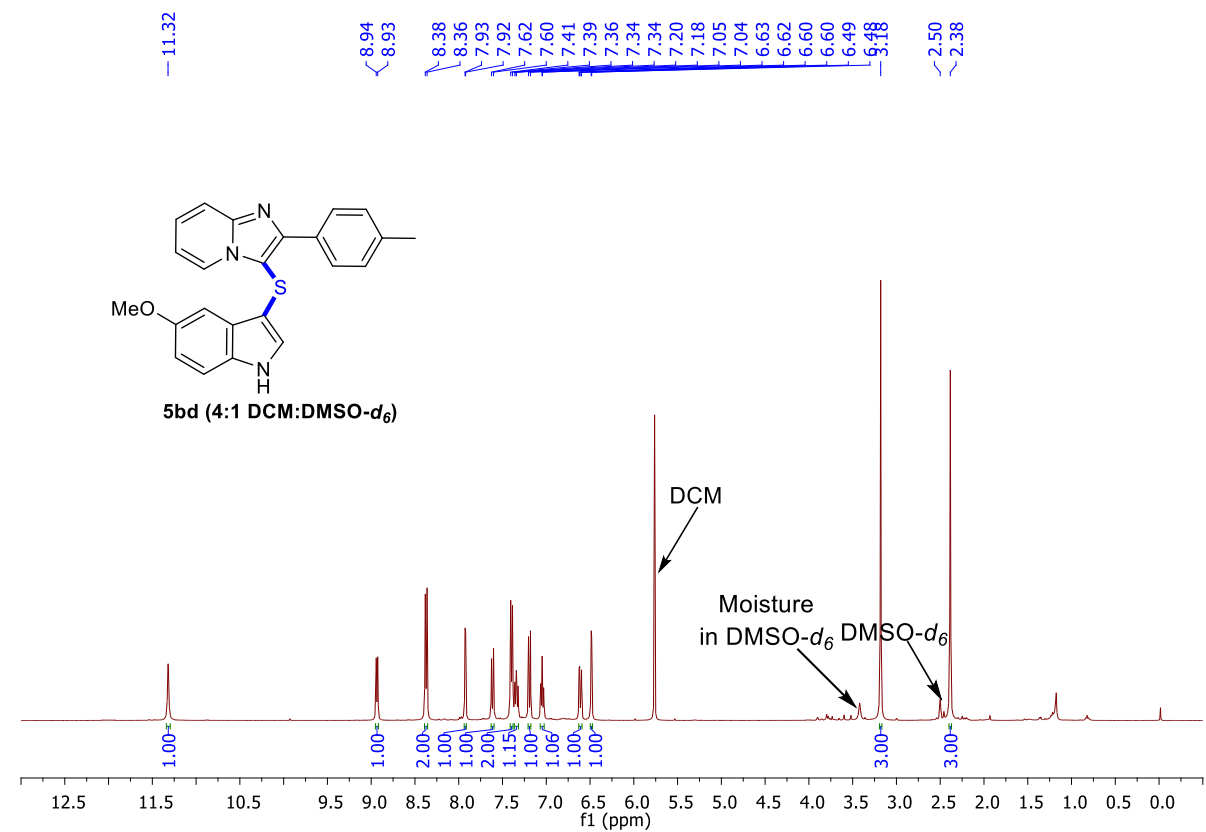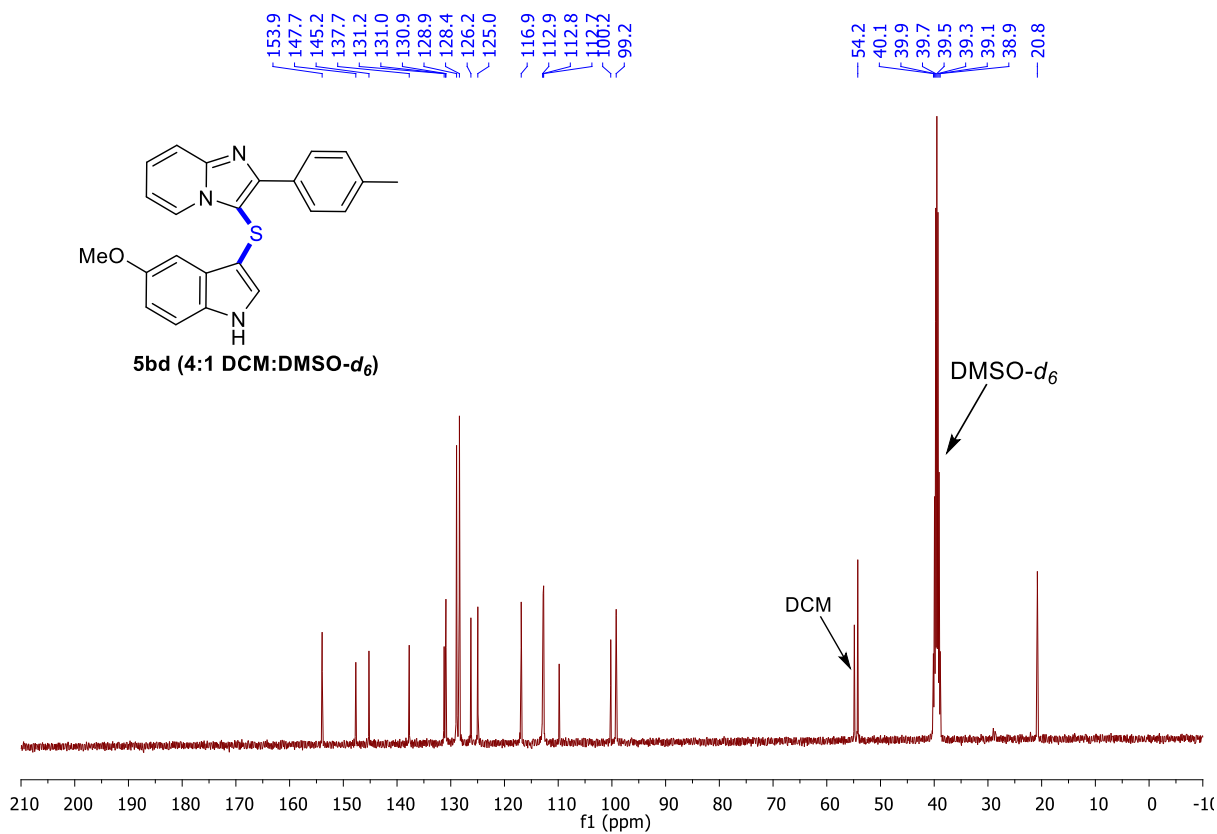

Supplement: d1nj05226h1.pdf [file d1nj05226h1.pdf]
